# Supplementary material for: The long-term effects of occupational exposure to vinyl chloride monomer on microcirculation: a cross-sectional study 15 years after retirement
Source: PubMed Central journal article supplement — BMJ Open. 2013 Jun 6;3(6):e002785. doi: 10.1136/bmjopen-2013-002785 (PMC3686170; doi:10.1136/bmjopen-2013-002785), 2013-06-06
Supplement: bmjopen-2013-002785.draft_revisions.pdf [file bmjopen-2013-002785.draft_revisions.pdf]

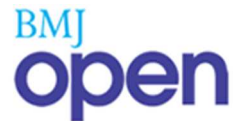

**The long-term effects of occupational exposure to vinyl chloride monomer on microcirculation: a cross-sectional study 15 years after retirement**

|                                 |                                                                                                                                                                                                                                                                                                                         |
|---------------------------------|-------------------------------------------------------------------------------------------------------------------------------------------------------------------------------------------------------------------------------------------------------------------------------------------------------------------------|
| Journal:                        | <i>BMJ Open</i>                                                                                                                                                                                                                                                                                                         |
| Manuscript ID:                  | bmjopen-2013-002785                                                                                                                                                                                                                                                                                                     |
| Article Type:                   | Research                                                                                                                                                                                                                                                                                                                |
| Date Submitted by the Author:   | 27-Feb-2013                                                                                                                                                                                                                                                                                                             |
| Complete List of Authors:       | Lopez, Vincent; CHU G. Montpied, Chamoux, Alain; CHU G. Montpied, Tempier, Marion; CHU G. Montpied, Thiel, Helene; CHU G. Montpied, Ughetto, Sylvie; CHU G. Montpied, Trousselard, Marion; IRBA, Naughton, Geraldine; Australian Catholic University, School of Exercise Science<br>Dutheil, Frederic; CHU G. Montpied, |
| <b>Primary Subject Heading</b>: | Occupational and environmental medicine                                                                                                                                                                                                                                                                                 |
| Secondary Subject Heading:      | Public health                                                                                                                                                                                                                                                                                                           |
| Keywords:                       | OCCUPATIONAL & INDUSTRIAL MEDICINE, CHEMICAL PATHOLOGY, PUBLIC HEALTH                                                                                                                                                                                                                                                   |
|                                 |                                                                                                                                                                                                                                                                                                                         |

SCHOLARONE™  
Manuscripts

only

1  
2  
3 **The long-term effects of occupational exposure to vinyl chloride monomer**  
4  
5 **on microcirculation: a cross-sectional study 15 years after retirement**  
6  
7  
8  
9

10  
11  
12  
13 Vincent Lopez <sup>1</sup>, Alain Chamoux <sup>1</sup>, Marion Tempier <sup>2</sup>, Hélène Thiel <sup>3</sup>, Sylvie Ughetto <sup>4</sup>,  
14  
15 Marion Trousselard <sup>5</sup>, Geraldine Naughton <sup>6</sup>, Frédéric Dutheil <sup>1,6,7,\*</sup>  
16  
17

18  
19  
20 <sup>1</sup> Occupational Medicine, University Hospital CHU G. Montpied, 63000 Clermont-Ferrand,  
21  
22 France

23  
24 <sup>2</sup> Radiopharmacy, University Hospital CHU G. Montpied, 63000 Clermont-Ferrand, France

25  
26 <sup>3</sup> Vascular Medicine, University Hospital CHU G. Montpied, 63000 Clermont-Ferrand,  
27  
28 France

29  
30  
31 <sup>4</sup> Department of Medical Information - Clinical research and innovation direction, University  
32  
33 Hospital CHU G. Montpied, 63000 Clermont-Ferrand, France

34  
35 <sup>5</sup> Neurophysiology of emotions, ENOP department, CRSSA/IRBA, 38702 La Tronche,  
36  
37 France

38  
39  
40 <sup>6</sup> School of Exercise Science, Australian Catholic University, Locked Bag 4115 Fitzroy MDC  
41  
42 VIC 3065, Australia

43  
44 <sup>7</sup> Laboratory of Metabolic Adaptations to Exercise in Physiological and Pathological  
45  
46 conditions (AME2P, EA3533), 63000 Clermont-Ferrand, France

47  
48  
49  
50  
51 **\*Correspondance to** Frédéric Dutheil, Occupational Medicine, University Hospital CHU G.  
52  
53 Montpied, 63000 Clermont-Ferrand, France Tel: +33 6 88 22 48 48. Fax: +33 4 73 27 46 49.  
54  
55 fred\_dutheil@yahoo.fr.  
56  
57  
58  
59  
60

1  
2  
3 Running Title: Capillaroscopy post-exposure to VCM  
4

5 Words count for introduction methods results discussion conclusion: 2298  
6

7 Number of tables: 1  
8

9 Number of figures: 2  
10

11 Words count for abstract: 258  
12  
13  
14  
15  
16  
17  
18  
19  
20  
21  
22  
23  
24  
25  
26  
27  
28  
29  
30  
31  
32  
33  
34  
35  
36  
37  
38  
39  
40  
41  
42  
43  
44  
45  
46  
47  
48  
49  
50  
51  
52  
53  
54  
55  
56  
57  
58  
59  
60

For peer review only

## ABSTRACT

**Objectives:** To assess residual long-term microcirculation abnormalities by capillaroscopy, 15 years after retiring from occupational exposure to vinyl chloride monomer (VCM).

**Design:** Cross-sectional study.

**Setting:** Allier, one of the major area of PVC production in France.

**Participants:** We enrolled 761 male retired workers exposed to chemical toxics. Exposure to chemical other than VCM excluded potential participants.

**Primary and secondary outcomes measures:** These participants underwent a medical examination including a capillaroscopy, symptoms of Raynaud, and comorbidities, as well as a survey to determine exposure time, direct or indirect contact, type of occupation, smoking status and time after exposure. A double blind analysis of capillaroscopic images was done. A control group was matched in age, sex, type of occupation.

**Results:** 179/761 retired workers were only exposed to VCM at their work, with 21 meeting the inclusion criteria and included. Exposure time was  $29.8 \pm 1.9$  years and time after exposure was  $15.9 \pm 2.4$  years. Retired workers previously exposed to VCM had significantly higher capillaroscopic modifications than 35 controls: enlarged capillaries (19% vs. 0%,  $p < .001$ ), dystrophy (28.6% vs. 0%,  $p = .0012$ ), and augmented length (33% vs. 0%,  $p < .001$ ). Time exposure was linked with enlarged capillaries ( $R^2$  adjusted = 53%,  $p < .0001$ ). They also had higher symptoms of Raynaud (19% vs. 0%,  $p = .007$ ) without correlation with capillaroscopic modifications.

**Conclusion:** Although VCM exposure was already known to affect microcirculation, our study demonstrates residual long term abnormalities following an average of 15 years retirement, with a time-related exposure response. Symptoms of Raynaud, although statistically associated with exposure was not related to capillaroscopic modifications; its origin remains to be determined.

1  
2  
3 **Keywords** Exposition, Vinyl chloride monomer, Capillaroscopy, Raynaud  
4  
5  
6  
7  
8  
9  
10  
11  
12  
13  
14  
15  
16  
17  
18  
19  
20  
21  
22  
23  
24  
25  
26  
27  
28  
29  
30  
31  
32  
33  
34  
35  
36  
37  
38  
39  
40  
41  
42  
43  
44  
45  
46  
47  
48  
49  
50  
51  
52  
53  
54  
55  
56  
57  
58  
59  
60

For peer review only

**ARTICLE SUMMARY****Article focus**

- Vinyl chloride monomer exposure induces microcirculation abnormalities, which can be diagnosed by capillaroscopy.
- Residual long-term abnormalities following retirement required investigation.

**Key messages**

- Our results demonstrated residual long-term abnormalities following an average of 15 years retirement, with a time-related exposure response.
- Symptoms of Raynaud, although statistically associated with exposure, was not related to capillaroscopic modifications; its origin remains to be determined.

**Strengths and limitations of this study**

- The strong points is that this study had a rigorous selection criteria of exclusively VCM exposed participants avoided confounding factor and the focus on retired workers at least 15 years after the end of occupational VCM exposure.
- The main limitation is that pathophysiology of Raynaud after VCM exposure remains unclear.

## INTRODUCTION

Vinyl chloride monomer (VCM) is primarily used in the manufacture of plastics and also serves as a raw material in organic synthesis. VCM is an aliphatic hydrocarbon also known as chloroethene. Its polymerization lead to a synthetic resin called polyvinyl chloride, commonly abbreviated PVC. PVC, is the third-most widely produced plastic, after polyethylene and polypropylene.<sup>1</sup> PVC can be made softer and more flexible by the addition of phthalates, and may also replace rubber. Thus, PVC is widely used including: pipes and water distribution, a substitute for painted wood (e.g. window frames, sills, flooring), electrical cable insulation, inflatable products, waterproof clothing (e.g. coats, skiing equipment, shoes), healthcare products (e.g. containers, tubing, catheters), food packaging, dental appliances and vinyl records.<sup>1</sup>

Harmless in its polymeric form, workers handling the finished PVC product are perfectly safe. In contrast, the at-risk phase lies in the manual descaling of autoclaves used for the polymerization where workers can contact it during its monomer state.<sup>2</sup> The chronic intoxication by gaseous monomer VCM is linked to several symptoms such as:<sup>3</sup> asthenia and dizziness,<sup>3</sup> Raynaud's syndrome,<sup>4 5</sup> digestive ulcers with nausea and anorexia,<sup>3</sup> systemic symptoms of arthralgia and myalgia<sup>3</sup>, trophic cutaneous symptoms and sclerosis. It has also been suspected in the onset of acroosteolysis<sup>4 6 7</sup> and hepatocellular carcinoma.<sup>8 9</sup> More generally, VCM exposure involves chromosomal aberrations and increased carcinogenic risk.<sup>10</sup> Even if VCM related diseases may have a genetic bases, they are also linked to prolonged occupational VCM exposure.<sup>5 11</sup>

Scleroderma-like microvascular abnormalities have been also described on exposed workers.<sup>12-14</sup> The most common and non-invasive means of investigating these abnormalities is capillaroscopy. Widespread identification of individuals most at risk could enable early detection and treatment. The residual effects of VCM on microcirculation have been shown

1  
2  
3 only once on 15 workers who had ceased their VCM exposure six months prior to testing.<sup>13</sup>  
4  
5 However, residual long-term abnormalities following retirement are unknown. Our hypothesis  
6  
7 was higher capillaroscopic abnormalities in the VCM exposed group than in the control  
8  
9 group.  
10  
11 Therefore, the aim of our cross-sectional study was to investigate residual long-term  
12  
13 capillaroscopic abnormalities following retirement, after 15 years without VCM exposure.  
14  
15  
16  
17  
18  
19

## 20 21 **METHODS**

### 22 23 **Participants**

24  
25 We enrolled male retired workers exposed to VCM in PVC production. They provided written  
26  
27 informed consent. The study was approved by the human ethics committees from Clermont-  
28  
29 Ferrand university hospital, France. To be eligible, participants had to be: male, retired, aged  
30  
31 over 60 years, with at least a 5-year occupational exposure to VCM, a time after VCM  
32  
33 exposure of at least 5 years, and no exposure to chemicals other than VCM. Moreover,  
34  
35 participants with diabetes mellitus were also excluded as it may interfere with  
36  
37 microcirculation,<sup>15-20</sup> as well as individuals declaring the use or previous use of treatments  
38  
39 which may alter microcirculation.  
40  
41  
42

43 Participants responded to a survey to determine exposure time, direct or indirect contact, type  
44  
45 of occupation, time after exposure and smoking history. They underwent a medical  
46  
47 examination including a capillaroscopy, symptoms of Raynaud, and comorbidities such as  
48  
49 pathologies that may interfere with microcirculation (arterial hypertension, dyslipidemia) or  
50  
51 pathologies potentially linked with VCM exposure (cardiovascular or respiratory diseases).<sup>21</sup>  
52  
53  
54  
55  
56  
57  
58  
59  
60



1  
2  
3 A control group was matched in age, sex, type of occupation. They were recruited via  
4 advertisements. Selection criteria for this group also included no occupational or leisure  
5 chemical exposure, and no diabetes mellitus.<sup>15-20</sup>  
6  
7  
8  
9

### 10 11 12 **Capillaroscopy**

13 A nailfold capillaroscopy was performed on all fingers of each patient, excluding thumbs.<sup>22</sup>

14 The nailfold capillaroscopies of the fingers were captured in images and electronically stored.

15 The same investigator conducted all the capillaroscopies. A double blind analysis of  
16 capillaroscopic images was completed on deidentified data.  
17  
18

19 The outcomes were the five following classical criteria used in capillaroscopy:<sup>23</sup> density,  
20 length, diameter, dystrophy and hemorrhage. Criteria for abnormalities were defined as:  
21 decreased capillary density <10/mm (avascular zone <7/mm), augmented capillary length  
22 >300µm, increased capillary diameter >30µm (megacapillary >50µm), and dystrophy was  
23 associated with capillary branching >15%.  
24  
25  
26  
27  
28  
29  
30  
31  
32  
33  
34  
35  
36

### 37 **Statistics**

38 Data are presented as mean percentage change and standard deviation (SD).

39 The main judgment criterion for abnormal microcirculation was the presence of at least one  
40 abnormality in capillaroscopy. The most common abnormality is capillary dystrophy.<sup>23</sup>

41 Previous data<sup>2 23</sup> and personal observation on residual long-term abnormalities following  
42 VCM exposure showed that a percentage of dystrophy of approximately 25% was required to  
43 differentiate between the exposed group and the controls. Using this value as the main  
44 outcome, we calculated that a sample of 10 participants per group allows a statistical power  
45 greater than 80% with an alpha level less than 5%.  
46  
47  
48  
49  
50  
51  
52  
53  
54  
55  
56  
57  
58  
59  
60

1  
2  
3 Statistical analyses were performed with SPSS software, v19. The Gaussian distribution for  
4 each parameter was assessed by a Shapiro-Wilk test. Comparisons between groups (exposed  
5 vs. control) were made through the usual tests: Chi2 test for categorical variables (or Fisher's  
6 exact test where appropriate) and Student's t test for quantitative variables (or Kruskal-Wallis  
7 if assumptions of normal distribution were violated). Significance was accepted for a p-value  
8 < 5%. A matrix of the correlations between the outcomes and exposure was determined using  
9 a non parametric Spearman test. Multivariate models were used to predict the relationship  
10 between capillary parameters and other parameters such as exposure time and time after  
11 exposure.  
12  
13  
14  
15  
16  
17  
18  
19  
20  
21  
22  
23  
24  
25  
26

## 27 **RESULTS**

### 31 **Participants**

32 We enrolled 761 male retired workers exposed to chemical toxics from two leading enterprises  
33 involved in PVC production (n=435 and n=91), as well as participants from many  
34 subcontracting companies (n=235), also known for VCM exposure. The strict selection  
35 criteria of exposure only to VCM reduced the sample size to 21 (figure 1).  
36  
37  
38  
39  
40  
41

42 Thirty five age-matched controls were also recruited without occupational or leisure time  
43 exposure to chemical toxics.  
44  
45  
46  
47  
48

### 49 **Main capillaroscopic outcomes**

50 There was no missing data. Double blinded analysis showed no statistical difference between  
51 the two investigators.  
52  
53  
54  
55  
56  
57  
58  
59  
60

1  
2  
3 Compared with controls, retired workers previously exposed to VCM had higher  
4 capillaroscopic abnormalities: enlarged capillaries (0% vs. 19%,  $p<.001$ ), dystrophy (0% vs.  
5 28.6%,  $p=.0012$ ) (figure 2), and augmented length (0% vs. 33%,  $p<.001$ ). The mean length  
6 was higher in the exposed group than in controls ( $291\pm 14\mu$  vs.  $254\pm 9\mu$ ,  $p=.020$ ), as well as  
7 the mean diameter of capillaries ( $28.9\pm 0.9\mu$  vs.  $25.7\pm 0.6\mu$ ,  $p=.006$ ) (table 1).  
8  
9  
10  
11  
12

### 13 14 15 16 **Exposure**

17 Exposure time was  $29.8\pm 1.9$  years and time after exposure was  $15.9\pm 2.4$  years. Time of  
18 exposure to VCM was strongly linked with enlarged capillaries ( $R^2$  adjusted = 53%,  $p<.0001$ )  
19 and modestly linked with capillary length ( $R^2$  adjusted = 8%;  $p=.031$ ) (table 1). Age was not  
20 associated with capillaroscopic abnormalities.  
21  
22  
23  
24  
25  
26  
27

### 28 29 30 **Symptoms of Raynaud**

31 VCM exposed group also had more symptoms of Raynaud (19% vs. 0%,  $p=.007$ ) independent  
32 of capillaroscopic modifications (table 1).  
33  
34  
35  
36  
37  
38  
39

### 40 41 42 **Comorbidities and smoking**

43 Neither respiratory nor cardiovascular diseases were associated with VCM exposure.  
44 However, we combined both groups to explore potential associations between capillaroscopic  
45 parameters and high blood pressure, dyslipidemia, and smoking. Capillary length in  
46 participants medicated for arterial hypertension ( $n=20/61$ ) did not differ from participants  
47 without hypertension. Participants treated with lipid lowering drugs with dyslipidemia  
48 ( $n=10/61$ ) also showed a trend for a higher capillary length than participants without  
49 dyslipidemia ( $p=.079$ ). Finally, there were no capillaroscopic difference between smokers and  
50  
51  
52  
53  
54  
55  
56  
57  
58  
59  
60

1  
2  
3 non smokers. However, smokers who had been exposed to VCM tended to have a higher  
4  
5 capillary length than non smokers (p=.073).  
6  
7  
8  
9

## 10 11 12 **DISCUSSION**

### 13 14 15 16 17 **Principal findings of the study**

18  
19 Changes in microcirculation persist for at least 15 years following occupational VCM  
20  
21 exposure, with a time-related exposure response. Symptoms of Raynaud, although statistically  
22  
23 associated with exposure, was not related to pathological capillaroscopic changes.  
24  
25

### 26 27 28 **what the study adds**

29  
30 The microcirculation changes following VCM exposure has been previously shown on 15  
31  
32 workers who ceased their occupational exposure six months prior to testing.<sup>13</sup> Our study  
33  
34 supports these results over a longer period following VCM exposure – 15 years.  
35

36  
37 The dose responsiveness of VCM exposure and compromised capillarisation is well  
38  
39 accepted.<sup>13</sup> Although daily VCM doses may have been more informative, the current study  
40  
41 was restricted to years of exposure. Thus, we are limited to describing associations with an  
42  
43 exposure time – response rather than a dose-response.  
44

45  
46 The absence of changes in microcirculation on less exposed workers<sup>24</sup> resulted in a suggestion  
47  
48 that a threshold of exposure exists. This finding is supported by previous studies showing that  
49  
50 long-term exposure (>8 years) induced greater chromosomal aberrations.<sup>10 25</sup> Further, not all  
51  
52 workers exposed to VCM develop microvascular abnormalities, suggestive of an underlying  
53  
54 genetic susceptibility (polymorphism of glutathione S-transferase).<sup>5 11</sup> A finding that female  
55  
56  
57  
58  
59  
60

1  
2  
3 VCM-exposed workers were more susceptible than males to the risk of increased  
4  
5 chromosome damage also reinforced genetic susceptibility theory.<sup>25</sup>  
6  
7  
8

### 9 10 **Comparison with other studies**

11 After 50 years, minor dystrophies could alter readability and interpretation of capillaroscopic  
12 analyses.<sup>26</sup> Nevertheless, we controlled this parameter by matching the exposed group and the  
13 controls on age and we conducted a double-blind analysis by two experienced readers.  
14  
15 Moreover, capillaroscopic abnormalities among workers exposed to VCM in the present study  
16 were not influenced by age.<sup>13</sup>  
17  
18

19 VCM has been suspected of causing respiratory and circulatory diseases.<sup>27</sup> However, similar  
20 frequencies of these diseases in both groups do not support this hypothesis.  
21  
22

23 Diabetes mellitus,<sup>15-20</sup> high blood pressure,<sup>17 28-30</sup> dyslipidemia,<sup>29</sup> or some  
24 comorbidities/medications<sup>21</sup> could interfere with microcirculation. In line with previous  
25 studies, we showed a diminished capillary length in participants treated for arterial  
26 hypertension,<sup>17 28-30</sup> and a trend for participants treated with lipid lowering drugs.<sup>29</sup> Diabetes  
27 mellitus was an exclusion criterion and thus, could not interfere with our results. Perhaps due  
28 to low numbers of participants, our results failed to support previous findings of compromised  
29 microcirculation in people with high blood pressure. The trend for increased capillary length  
30 observed in our participants with dyslipidemia could be a response to increased peripheral  
31 vascular resistance, in order to maintain their function of metabolic exchange.<sup>30</sup> Similarly,  
32 smoking could induce a decrease in tissue perfusion,<sup>31</sup> and dystrophia.<sup>32</sup> We did not observe  
33 differences between smokers and non-smokers, with the exception of a trend for abnormal  
34 microcirculation among smokers exposed to VCM. The potential of a synergistic effect of  
35 tobacco and VCM-exposure warrants further investigations. It should be noted that VCM  
36  
37  
38  
39  
40  
41  
42  
43  
44  
45  
46  
47  
48  
49  
50  
51  
52  
53  
54  
55  
56  
57  
58  
59  
60

1  
2  
3 exposure in the current study was more strongly associated with compromised  
4 microcirculation than high blood pressure, dyslipidemia and smoking.  
5  
6

7 A higher prevalence of symptoms of Raynaud has been established in workers with VCM  
8 exposure,<sup>27</sup> up to one third of the exposed workers.<sup>13</sup> Our results support these data, and  
9 extend knowledge by demonstrating the prevalence of symptoms of Raynaud remained higher  
10 at least 15 years following VCM exposure. Furthermore, in the current study, all the  
11 participants who suffered from symptoms of Raynaud had never taken medications or  
12 suffered from other diseases conducive to Raynaud.  
13  
14  
15  
16  
17  
18  
19  
20  
21  
22

### 23 **Unanswered questions**

24 Although symptoms of Raynaud are statistically associated with VCM exposure, we could not  
25 report a link with capillaroscopic modifications. The pathophysiology of Raynaud's  
26 phenomenon remains unknown. There seems to be primary or secondary vascular failure  
27 influenced by a hereditary factor.<sup>33</sup> Decreased perfusion pressure could be secondary to  
28 systemic hypotension or be caused by proximal arterial occlusion, influenced by many  
29 factors; both vascular and intra vascular, neural, environmental or hereditary.<sup>34</sup> Angiography  
30 of the hands of patients exposed to VCM showed occlusions, stenosis and narrowing of distal  
31 arteries with the development of collateral circulation.<sup>35</sup> Lack of statistical power in our study  
32 could contribute to the lack of relationship between capillaroscopic changes and symptoms of  
33 Raynaud.  
34  
35  
36  
37  
38  
39  
40  
41  
42  
43  
44  
45  
46  
47  
48  
49

### 50 **Strengths and limitations of study**

51 This study presents some major strengths: a rigorous selection criteria of exclusively VCM  
52 exposed participants avoided confounding factors, well-matched controls, a double blind  
53 analyses, sufficient number of participants to detect the capillaroscopic differences between  
54  
55  
56  
57  
58  
59  
60

1  
2  
3 groups, the focus on retired workers at least 15 years after the end of occupational VCM  
4 exposure. The attendance rate of 30% (53 of 179 individuals exclusively exposed to VCM at  
5 work agreed to participate in our study) seems very high compared with other studies<sup>36-40</sup>  
6  
7 taking into account their age (75 years), distance from the location of the medical examination  
8  
9 (averaging approximately 80 km), and that no financial compensation was offered.  
10  
11

12  
13  
14 There are limitations to this study: a cross-sectional design however, proof of concept was  
15 important and achieved (with a possibility of longitudinal follow-up); differences in some but  
16 not all capillary outcomes may be explained by a lack of power; the results are insufficient to  
17 propose guidelines for all workers exposed to VCM; more accurate quantifiable measures of  
18 VCM exposure are not available, however for the purpose of this study we used industry  
19 established lists of exposure legally required in France; we combined our knowledge only use a  
20 binary pathophysiology of Raynaud after VCM exposure remains unclear, most of the retired  
21 workers exposed to VCM were from the same enterprise; and potentially more at-risk  
22 manufacturing processes remained undetected.  
23  
24  
25  
26  
27  
28  
29  
30  
31  
32  
33  
34  
35  
36  
37  
38  
39

## 40 CONCLUSION

41  
42 Although VCM exposure was already known to affect microcirculation, our study  
43 demonstrated residual long-term abnormalities following an average of 15 years retirement,  
44 with a time exposure – response. Symptoms of Raynaud, although statistically associated with  
45 exposure were not associated with capillaroscopic modifications; its origin remains to be  
46 determined. Future research could focus on other chemical products which have a similar  
47 structure than VCM and more extensive research on type of occupations at-risk of VCM  
48 exposure.  
49  
50  
51  
52  
53  
54  
55  
56  
57  
58  
59  
60

### Role of the Funding Source

The Occupational Medicine department of CHU G. Montpied, Clermont-Ferrand, France funded this study. No other funding source had a role in the design, conduct, or reporting of the study.

### Contributors

VL has participated as a MD student and principal investigator. FD and AC obtained research funding and generated the intellectual development of the study. FD knew potential exposed workers to VCM. VL, FD, AC and SH contributed to the conception of the protocol. VL, FD and SH made data analysis. VL, FD, MT contributed to manuscript drafting. VL recruited all participants and performed all capillaroscopies. VL and MT completed the double blind analyses of capillaroscopy. FD, AC, VL, GN and MT revised the manuscript. All authors read and approved the final manuscript.

### Acknowledgments

Our thanks to Geraldine Naughton for help with manuscript English proof reading. We also want to acknowledge the “Association of the sick from chemicals” (Association des Malades de la Chimie), 15 Av Albert Poncet 03410 Domerat, France, which helped us recruit the retired workers from VCM exposure.

### REFERENCES

- 1 Allsopp M, Giovanni G. Poly(Vinyl Chloride) *Ullmann's Encyclopedia of Industrial Chemistry* 2000.
- 2 Fontana L, Baietto M, Becker F, Catilina P. [Clinical and capillaroscopic study of Raynaud's phenomenon in retired patients previously exposed to vinyl chloride monomer]. *J Mal Vasc* 1995;20:268-73.



- 1  
2  
3 Veltman G, Lange CE, Juhe S, Stein G, Bachner U. Clinical manifestations and course  
4 of vinyl chloride disease. *Ann NY Acad Sci* 1975;246:6-17.
- 5 Harris DK, Adams WG. Acro-osteolysis occurring in men engaged in the  
6 polymerization of vinyl chloride. *Br Med J* 1967;3:712-4.
- 7 Fontana L, Marion MJ, Ughetto S, Catilina P. Glutathione S-transferase M1 and GST  
8 T1 genetic polymorphisms and Raynaud's phenomenon in French vinyl chloride  
9 monomer-exposed workers. *J Hum Genet* 2006;51:879-86.
- 10 Preston BJ, Jones KL, Grainger RG. Clinical aspects of vinyl chloride disease: acro-  
11 osteolysis. *Proc R Soc Med* 1976;69:284-6.
- 12 Wilson RH, McCormick WE, Tatum CF, Creech JL. Occupational acroosteolysis.  
13 Report of 31 cases. *JAMA* 1967;201:577-81.
- 14 Dragani TA, Zocchetti C. Occupational exposure to vinyl chloride and risk of  
15 hepatocellular carcinoma. *Cancer Causes Control* 2008;19:1193-200.
- 16 Mundt KA, Dell LD, Austin RP, Luippold RS, Noess R, Bigelow C. Historical cohort  
17 study of 10 109 men in the North American vinyl chloride industry, 1942-72: update  
18 of cancer mortality to 31 December 1995. *Occup Environ Med* 2000;57:774-81.
- 19 Kumar AK, Balachandar V, Arun M et al. A Comprehensive Analysis of Plausible  
20 Genotoxic Covariates Among Workers of a Polyvinyl Chloride Plant Exposed to  
21 Vinyl Chloride Monomer. *Arch Environ Contam Toxicol* 2012.
- 22 Ji F, Zhu S, Sun P, Wang W. [Relationship between genetic polymorphisms of phase I  
23 and phase II metabolizing enzymes and DNA damage of workers exposed to vinyl  
24 chloride monomer]. *Wei Sheng Yan Jiu* 2009;38:7-11.
- 25 Langauer-Lewowicka H. Nailfolds capillary abnormalities in polyvinyl chloride  
26 production workers. *Int Arch Occup Environ Health* 1983;51:337-40.
- 27 Maricq HR, Darke CS, Archibald RM, Leroy EC. In vivo observations of skin  
28 capillaries in workers exposed to vinyl chloride. An English-American comparison. *Br  
29 J Ind Med* 1978;35:1-7.
- 30 Maricq HR, Johnson MN, Whetstone CL, LeRoy EC. Capillary abnormalities in  
31 polyvinyl chloride production workers. Examination by in vivo microscopy. *JAMA*  
32 1976;236:1368-71.
- 33 Pazos-Moura CC, Moura EG, Bouskela E, Torres Filho IP, Breitenbach MM. Nailfold  
34 capillaroscopy in non-insulin dependent diabetes mellitus: blood flow velocity during  
35 rest and post-occlusive reactive hyperaemia. *Clin Physiol* 1990;10:451-61.
- 36 Iabichella ML, Mariotti R, Nuti M, Balbarini A, Mariani M. [Site specificity of  
37 biomicroscopic pattern in diabetic patients]. *Minerva Cardioangiol* 1999;47:619-21.
- 38 Lambova SN, Muller-Ladner U. The specificity of capillaroscopic pattern in  
39 connective autoimmune diseases. A comparison with microvascular changes in  
40 diseases of social importance: arterial hypertension and diabetes mellitus. *Mod  
41 Rheumatol* 2009;19:600-5.
- 42 Vayssairat M, Le Devehat C. [Critical analysis of vascular explorations in diabetic  
43 complications]. *J Mal Vasc* 2001;26:122-5.
- 44 Meyer MF, Pfohl M, Schatz H. [Assessment of diabetic alterations of microcirculation  
45 by means of capillaroscopy and laser-Doppler anemometry]. *Med Klin (Munich)*  
46 2001;96:71-7.
- 47 Chang CH, Tsai RK, Wu WC, Kuo SL, Yu HS. Use of dynamic capillaroscopy for  
48 studying cutaneous microcirculation in patients with diabetes mellitus. *Microvasc Res*  
49 1997;53:121-7.
- 50 Gallucci F, Russo R, Buono R, Acampora R, Madrid E, Uomo G. Indications and  
51 results of videocapillaroscopy in clinical practice. *Adv Med Sci* 2008;53:149-57.
- 52  
53  
54  
55  
56  
57  
58  
59  
60

- 1  
2  
3 22 Hern S, Mortimer PS. Visualization of dermal blood vessels--capillaroscopy. *Clin Exp Dermatol* 1999;24:473-8.
- 4  
5 23 Kabasakal Y, Elvins DM, Ring EF, McHugh NJ. Quantitative nailfold capillaroscopy  
6 findings in a population with connective tissue disease and in normal healthy controls.  
7 *Ann Rheum Dis* 1996;55:507-12.
- 8  
9 24 Przybylowski J, Podolecki A, Laks L et al. [Health status of workers in polyvinyl  
10 chloride processing plants. I. Evaluation of occupational exposure. Subjective and  
11 capillaroscopy studies. Conduction velocity in the motor nerves]. *Med Pr*  
12 1983;34:385-96.
- 13  
14 25 Jiao J, Feng NN, Li Y et al. Estimation of a Safe Level for Occupational Exposure to  
15 Vinyl Chloride Using a Benchmark Dose Method in Central China. *J Occup Health*  
16 2012.
- 17  
18 26 Carpentier PH. New techniques for clinical assessment of the peripheral  
19 microcirculation. *Drugs* 1999;59 Spec No:17-22.
- 20  
21 27 Laplanche A, Clavel F, Contassot JC, Lanouziere C. Exposure to vinyl chloride  
22 monomer: report on a cohort study. *Br J Ind Med* 1987;44:711-5.
- 23  
24 28 Prasad A, Dunnill GS, Mortimer PS, MacGregor GA. Capillary rarefaction in the  
25 forearm skin in essential hypertension. *J Hypertens* 1995;13:265-8.
- 26  
27 29 Bonacci E, Santacroce N, D'Amico N, Mattace R. Nail-fold capillaroscopy in the  
28 study of microcirculation in elderly hypertensive patients. *Arch Gerontol Geriatr*  
29 1996;22 Suppl 1:79-83.
- 30  
31 30 Antonios TF, Singer DR, Markandu ND, Mortimer PS, MacGregor GA. Structural  
32 skin capillary rarefaction in essential hypertension. *Hypertension* 1999;33:998-1001.
- 33  
34 31 Lehr HA. Microcirculatory dysfunction induced by cigarette smoking.  
35 *Microcirculation* 2000;7:367-84.
- 36  
37 32 Lova RM, Miniati B, Macchi C et al. Morphologic changes in the microcirculation  
38 induced by chronic smoking habit: a videocapillaroscopic study on the human labial  
39 mucosa. *Am Heart J* 2002;143:658.
- 40  
41 33 Block JA, Sequeira W. Raynaud's phenomenon. *Lancet* 2001;357:2042-8.
- 42  
43 34 Herrick AL. The pathogenesis, diagnosis and treatment of Raynaud phenomenon. *Nat*  
44 *Rev Rheumatol* 2012;8:469-79.
- 45  
46 35 Koischwitz D, Marsteller HJ, Lackner K, Brecht G, Brecht T. [Changes in the arteries  
47 in the hand and fingers due to vinyl chloride exposure (author's transl)]. *Rofo*  
48 1980;132:62-8.
- 49  
50 36 Dutheil F, Kelly C, Biat I et al. [Relation between the level of knowledge and the rate  
51 of vaccination against the flu virus among the staff of the Clermont-Ferrand  
52 University hospital]. *Med Mal Infect* 2008;38:586-94.
- 53  
54 37 Chiew M, Weber MF, Egger S, Sitas F. A cross-sectional exploration of smoking  
55 status and social interaction in a large population-based Australian cohort. *Social*  
56 *Science and Medicine* 2012;75:77-86.
- 57  
58 38 Penformis A, San-Galli F, Cimino L, Huet D. Current insulin therapy in patients with  
59 type 2 diabetes: results of the ADHOC survey in France. *Diabetes and Metabolism*  
60 2011;37:440-5.
- 61  
62 39 Heinavaara S, Tokola K, Kurttio P, Auvinen A. Validation of exposure assessment  
63 and assessment of recruitment methods for a prospective cohort study of mobile phone  
64 users (COSMOS) in Finland: a pilot study. *Environ Health* 2011;10:14.
- 65  
66 40 Eriksen L, Gronbaek M, Helge JW, Tolstrup JS, Curtis T. The Danish Health  
67 Examination Survey 2007-2008 (DANHES 2007-2008). *Scand J Public Health*  
68 2011;39:203-11.

**Table 1** Characteristics of participants, exposure to VCM and capillaroscopic outcomes.

|                                                                 | Retired from<br>exposure to VCM<br>(n=21) | Controls<br>(n=40) | p-<br>value |
|-----------------------------------------------------------------|-------------------------------------------|--------------------|-------------|
| Age – years                                                     | 74.4±2.9                                  | 76.3±3.2           | NS          |
| type of occupation: blue collar workers – “manual”              | 100%                                      | 100%               | NS          |
| <b>Exposure to VCM:</b>                                         |                                           |                    |             |
| direct contact with VCM                                         | 100%                                      | 0                  | <.001       |
| exposure time – years                                           | 29.8±1.9                                  | 0                  | <.001       |
| time after exposure – years                                     | 15.9±2.4                                  | -                  | -           |
| <b>Main capillaroscopic outcomes:</b>                           |                                           |                    |             |
| <b>1. density</b>                                               |                                           |                    |             |
| mean density – mm                                               | 8.6±0.4                                   | 8.8±0.3            | NS          |
| decreased capillary density <10/mm – n (%)                      | 9 (43)                                    | 16 (46)            | NS          |
| avascular zone <7/mm – n(%)                                     | 0                                         | 0                  | NS          |
| <b>2. length</b>                                                |                                           |                    |             |
| mean length – mm                                                | 291±14µ                                   | 254±9µ             | .020        |
| augmented capillary length >300µm – n(%)                        | 7 (33)                                    | 0                  | <.001       |
| <b>3. diameter</b>                                              |                                           |                    |             |
| mean diameter of capillaries – mm                               | 28.9±0.9µ                                 | 25.7±0.6µ          | .006        |
| enlarged capillaries >30µm – n(%)                               | 4 (19)                                    | 0                  | <.001       |
| megacapillary >50µm – n(%)                                      | 0                                         | 0                  | NS          |
| <b>4. dystrophy</b>                                             |                                           |                    |             |
| capillary branching >15% – n(%)                                 | 6 (29)                                    | 0                  | <.001       |
| <b>5. hemorrhage – n(%)</b>                                     |                                           |                    |             |
|                                                                 | 0                                         | 0                  | NS          |
| <b>Symptoms of Raynaud:</b>                                     |                                           |                    |             |
| n(%) with Raynaud                                               | 4 (19)                                    | 0                  | .007        |
| Participants with medications which could induce Raynaud – n(%) | 2 (9)                                     | 4 (11)             | NS          |
| Other causes of Raynaud                                         | 0                                         | 0                  | NS          |
| <b>Comorbidities</b>                                            |                                           |                    |             |
| Respiratory diseases                                            | 2 (9)                                     | 6 (17)             | NS          |
| Cardiovascular diseases (except high blood pressure)            | 4 (19)                                    | 5 (14)             | NS          |
| Myocardial infraction                                           | 3 (14)                                    | 3(9)               | NS          |
| <b>Routine medications – n(%) of patients treated for:</b>      |                                           |                    |             |
| Blood pressure                                                  | 7 (33)                                    | 13 (37)            | NS          |
| Lipid lowering                                                  | 4 (19)                                    | 6 (17)             | NS          |
| <b>Smoking – n(%)</b>                                           | 9 (43)                                    | 18 (51)            | NS          |

Figure 1 Participant flow chart.

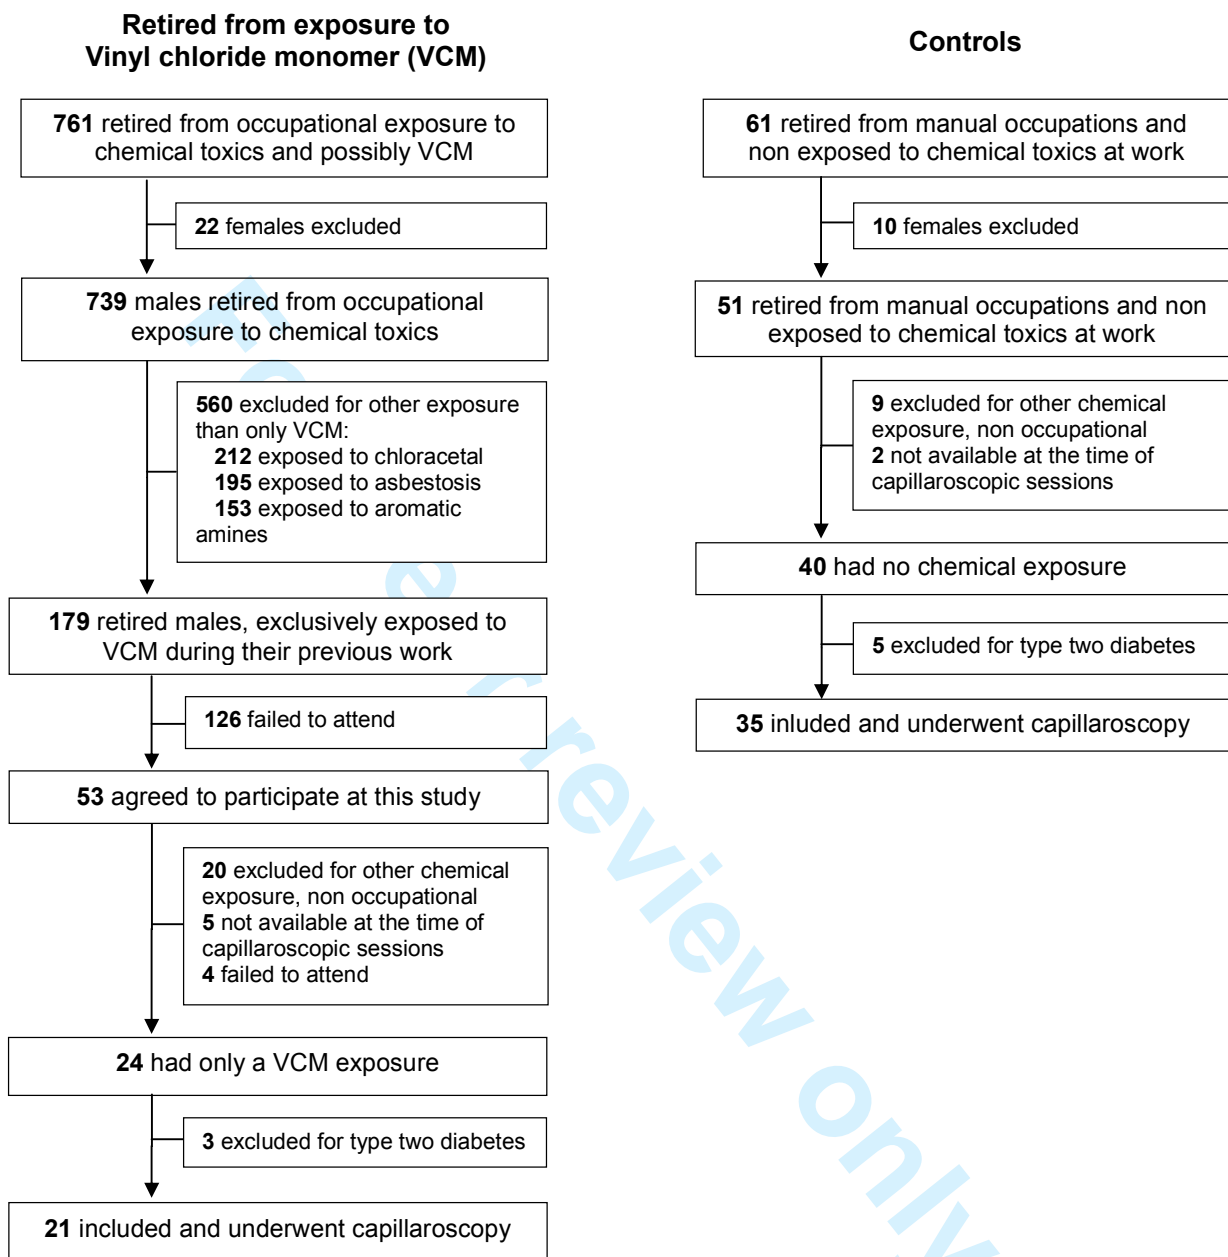

1  
2  
3 **Figure 2** Normal capillaroscopy on a control participant (A) and capillaroscopy with  
4 dystrophia >15% in a retired worker exposed to VCM for 37 years, with no treatment and no  
5 comorbidity, non smoking (B).  
6  
7  
8

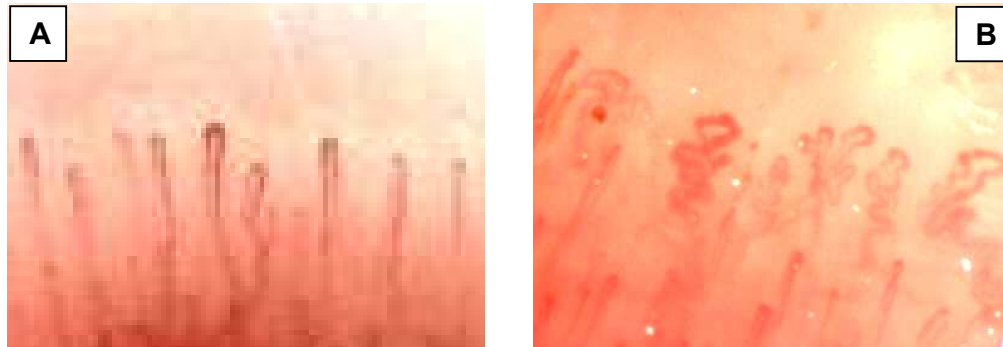

STROBE 2007 (v4) Statement—Checklist of items that should be included in reports of cross-sectional studies

| Section/Topic             | Item # | Recommendation                                                                                                                                                                       | Reported on page # |
|---------------------------|--------|--------------------------------------------------------------------------------------------------------------------------------------------------------------------------------------|--------------------|
| Title and abstract        | 1      | (a) Indicate the study’s design with a commonly used term in the title or the abstract                                                                                               | 1                  |
|                           |        | (b) Provide in the abstract an informative and balanced summary of what was done and what was found                                                                                  | 3                  |
| <b>Introduction</b>       |        |                                                                                                                                                                                      |                    |
| Background/rationale      | 2      | Explain the scientific background and rationale for the investigation being reported                                                                                                 | 6                  |
| Objectives                | 3      | State specific objectives, including any prespecified hypotheses                                                                                                                     | 7                  |
| <b>Methods</b>            |        |                                                                                                                                                                                      |                    |
| Study design              | 4      | Present key elements of study design early in the paper                                                                                                                              | 7-8                |
| Setting                   | 5      | Describe the setting, locations, and relevant dates, including periods of recruitment, exposure, follow-up, and data collection                                                      | 7                  |
| Participants              | 6      | (a) Give the eligibility criteria, and the sources and methods of selection of participants                                                                                          | 7                  |
| Variables                 | 7      | Clearly define all outcomes, exposures, predictors, potential confounders, and effect modifiers. Give diagnostic criteria, if applicable                                             | 7-8                |
| Data sources/ measurement | 8*     | For each variable of interest, give sources of data and details of methods of assessment (measurement). Describe comparability of assessment methods if there is more than one group | 7-8                |
| Bias                      | 9      | Describe any efforts to address potential sources of bias                                                                                                                            | 7                  |
| Study size                | 10     | Explain how the study size was arrived at                                                                                                                                            | 19 (figure 1)      |
| Quantitative variables    | 11     | Explain how quantitative variables were handled in the analyses. If applicable, describe which groupings were chosen and why                                                         | 8-9                |
| Statistical methods       | 12     | (a) Describe all statistical methods, including those used to control for confounding                                                                                                | 8-9                |
|                           |        | (b) Describe any methods used to examine subgroups and interactions                                                                                                                  | 8-9                |
|                           |        | (c) Explain how missing data were addressed                                                                                                                                          | 8-9                |
|                           |        | (d) If applicable, describe analytical methods taking account of sampling strategy                                                                                                   | 8-9                |
|                           |        | (e) Describe any sensitivity analyses                                                                                                                                                | 8-9                |
| <b>Results</b>            |        |                                                                                                                                                                                      |                    |

|                          |     |                                                                                                                                                                                                              |                     |
|--------------------------|-----|--------------------------------------------------------------------------------------------------------------------------------------------------------------------------------------------------------------|---------------------|
| Participants             | 13* | (a) Report numbers of individuals at each stage of study—eg numbers potentially eligible, examined for eligibility, confirmed eligible, included in the study, completing follow-up, and analysed            | 19 (figure 1)       |
|                          |     | (b) Give reasons for non-participation at each stage                                                                                                                                                         | 19 (figure 1)       |
|                          |     | (c) Consider use of a flow diagram                                                                                                                                                                           | 19 (figure 1)       |
| Descriptive data         | 14* | (a) Give characteristics of study participants (eg demographic, clinical, social) and information on exposures and potential confounders                                                                     | 7;9; 19 (figure 1)  |
|                          |     | (b) Indicate number of participants with missing data for each variable of interest                                                                                                                          | 9                   |
| Outcome data             | 15* | Report numbers of outcome events or summary measures                                                                                                                                                         | 9-10; 19 (figure 1) |
| Main results             | 16  | (a) Give unadjusted estimates and, if applicable, confounder-adjusted estimates and their precision (eg, 95% confidence interval). Make clear which confounders were adjusted for and why they were included | 9-10; 19 (figure 1) |
|                          |     | (b) Report category boundaries when continuous variables were categorized                                                                                                                                    | 9-10; 19 (figure 1) |
|                          |     | (c) If relevant, consider translating estimates of relative risk into absolute risk for a meaningful time period                                                                                             | -                   |
| Other analyses           | 17  | Report other analyses done—eg analyses of subgroups and interactions, and sensitivity analyses                                                                                                               | 9-10                |
| <b>Discussion</b>        |     |                                                                                                                                                                                                              |                     |
| Key results              | 18  | Summarise key results with reference to study objectives                                                                                                                                                     | 11-13               |
| Limitations              | 19  | Discuss limitations of the study, taking into account sources of potential bias or imprecision. Discuss both direction and magnitude of any potential bias                                                   | 13-14               |
| Interpretation           | 20  | Give a cautious overall interpretation of results considering objectives, limitations, multiplicity of analyses, results from similar studies, and other relevant evidence                                   | 11-13               |
| Generalisability         | 21  | Discuss the generalisability (external validity) of the study results                                                                                                                                        | 14                  |
| <b>Other information</b> |     |                                                                                                                                                                                                              |                     |
| Funding                  | 22  | Give the source of funding and the role of the funders for the present study and, if applicable, for the original study on which the present article is based                                                | 15                  |

\*Give information separately for cases and controls in case-control studies and, if applicable, for exposed and unexposed groups in cohort and cross-sectional studies.

**Note:** An Explanation and Elaboration article discusses each checklist item and gives methodological background and published examples of transparent reporting. The STROBE checklist is best used in conjunction with this article (freely available on the Web sites of PLoS Medicine at <http://www.plosmedicine.org/>, Annals of Internal Medicine at <http://www.annals.org/>, and Epidemiology at <http://www.epidem.com/>). Information on the STROBE Initiative is available at [www.strobe-statement.org](http://www.strobe-statement.org).



**The long-term effects of occupational exposure to vinyl chloride monomer on microcirculation: a cross-sectional study 15 years after retirement**

|                                 |                                                                                                                                                                                                                                                                                                                         |
|---------------------------------|-------------------------------------------------------------------------------------------------------------------------------------------------------------------------------------------------------------------------------------------------------------------------------------------------------------------------|
| Journal:                        | <i>BMJ Open</i>                                                                                                                                                                                                                                                                                                         |
| Manuscript ID:                  | bmjopen-2013-002785.R1                                                                                                                                                                                                                                                                                                  |
| Article Type:                   | Research                                                                                                                                                                                                                                                                                                                |
| Date Submitted by the Author:   | 04-Apr-2013                                                                                                                                                                                                                                                                                                             |
| Complete List of Authors:       | Lopez, Vincent; CHU G. Montpied, Chamoux, Alain; CHU G. Montpied, Tempier, Marion; CHU G. Montpied, Thiel, Helene; CHU G. Montpied, Ughetto, Sylvie; CHU G. Montpied, Trousselard, Marion; IRBA, Naughton, Geraldine; Australian Catholic University, School of Exercise Science<br>Dutheil, Frederic; CHU G. Montpied, |
| <b>Primary Subject Heading</b>: | Occupational and environmental medicine                                                                                                                                                                                                                                                                                 |
| Secondary Subject Heading:      | Public health                                                                                                                                                                                                                                                                                                           |
| Keywords:                       | OCCUPATIONAL & INDUSTRIAL MEDICINE, CHEMICAL PATHOLOGY, PUBLIC HEALTH                                                                                                                                                                                                                                                   |
|                                 |                                                                                                                                                                                                                                                                                                                         |

SCHOLARONE™  
Manuscripts

only



STROBE 2007 (v4) Statement—Checklist of items that should be included in reports of *cross-sectional studies*

| Section/Topic                | Item # | Recommendation                                                                                                                                                                       | Reported on page # |
|------------------------------|--------|--------------------------------------------------------------------------------------------------------------------------------------------------------------------------------------|--------------------|
| Title and abstract           | 1      | (a) Indicate the study's design with a commonly used term in the title or the abstract                                                                                               | 1                  |
|                              |        | (b) Provide in the abstract an informative and balanced summary of what was done and what was found                                                                                  | 3                  |
| <b>Introduction</b>          |        |                                                                                                                                                                                      |                    |
| Background/rationale         | 2      | Explain the scientific background and rationale for the investigation being reported                                                                                                 | 6                  |
| Objectives                   | 3      | State specific objectives, including any prespecified hypotheses                                                                                                                     | 7                  |
| <b>Methods</b>               |        |                                                                                                                                                                                      |                    |
| Study design                 | 4      | Present key elements of study design early in the paper                                                                                                                              | 7-8                |
| Setting                      | 5      | Describe the setting, locations, and relevant dates, including periods of recruitment, exposure, follow-up, and data collection                                                      | 7                  |
| Participants                 | 6      | (a) Give the eligibility criteria, and the sources and methods of selection of participants                                                                                          | 7                  |
| Variables                    | 7      | Clearly define all outcomes, exposures, predictors, potential confounders, and effect modifiers. Give diagnostic criteria, if applicable                                             | 7-8                |
| Data sources/<br>measurement | 8*     | For each variable of interest, give sources of data and details of methods of assessment (measurement). Describe comparability of assessment methods if there is more than one group | 7-8                |
| Bias                         | 9      | Describe any efforts to address potential sources of bias                                                                                                                            | 7                  |
| Study size                   | 10     | Explain how the study size was arrived at                                                                                                                                            | 19 (figure 1)      |
| Quantitative variables       | 11     | Explain how quantitative variables were handled in the analyses. If applicable, describe which groupings were chosen and why                                                         | 8-9                |
| Statistical methods          | 12     | (a) Describe all statistical methods, including those used to control for confounding                                                                                                | 8-9                |
|                              |        | (b) Describe any methods used to examine subgroups and interactions                                                                                                                  | 8-9                |
|                              |        | (c) Explain how missing data were addressed                                                                                                                                          | 8-9                |
|                              |        | (d) If applicable, describe analytical methods taking account of sampling strategy                                                                                                   | 8-9                |
|                              |        | (e) Describe any sensitivity analyses                                                                                                                                                | 8-9                |
| <b>Results</b>               |        |                                                                                                                                                                                      |                    |

|                          |     |                                                                                                                                                                                                              |                     |
|--------------------------|-----|--------------------------------------------------------------------------------------------------------------------------------------------------------------------------------------------------------------|---------------------|
| Participants             | 13* | (a) Report numbers of individuals at each stage of study—eg numbers potentially eligible, examined for eligibility, confirmed eligible, included in the study, completing follow-up, and analysed            | 19 (figure 1)       |
|                          |     | (b) Give reasons for non-participation at each stage                                                                                                                                                         | 19 (figure 1)       |
|                          |     | (c) Consider use of a flow diagram                                                                                                                                                                           | 19 (figure 1)       |
| Descriptive data         | 14* | (a) Give characteristics of study participants (eg demographic, clinical, social) and information on exposures and potential confounders                                                                     | 7;9; 19 (figure 1)  |
|                          |     | (b) Indicate number of participants with missing data for each variable of interest                                                                                                                          | 9                   |
| Outcome data             | 15* | Report numbers of outcome events or summary measures                                                                                                                                                         | 9-10; 19 (figure 1) |
| Main results             | 16  | (a) Give unadjusted estimates and, if applicable, confounder-adjusted estimates and their precision (eg, 95% confidence interval). Make clear which confounders were adjusted for and why they were included | 9-10; 19 (figure 1) |
|                          |     | (b) Report category boundaries when continuous variables were categorized                                                                                                                                    | 9-10; 19 (figure 1) |
|                          |     | (c) If relevant, consider translating estimates of relative risk into absolute risk for a meaningful time period                                                                                             | -                   |
| Other analyses           | 17  | Report other analyses done—eg analyses of subgroups and interactions, and sensitivity analyses                                                                                                               | 9-10                |
| <b>Discussion</b>        |     |                                                                                                                                                                                                              |                     |
| Key results              | 18  | Summarise key results with reference to study objectives                                                                                                                                                     | 11-13               |
| Limitations              | 19  | Discuss limitations of the study, taking into account sources of potential bias or imprecision. Discuss both direction and magnitude of any potential bias                                                   | 13-14               |
| Interpretation           | 20  | Give a cautious overall interpretation of results considering objectives, limitations, multiplicity of analyses, results from similar studies, and other relevant evidence                                   | 11-13               |
| Generalisability         | 21  | Discuss the generalisability (external validity) of the study results                                                                                                                                        | 14                  |
| <b>Other information</b> |     |                                                                                                                                                                                                              |                     |
| Funding                  | 22  | Give the source of funding and the role of the funders for the present study and, if applicable, for the original study on which the present article is based                                                | 15                  |

\*Give information separately for cases and controls in case-control studies and, if applicable, for exposed and unexposed groups in cohort and cross-sectional studies.

**Note:** An Explanation and Elaboration article discusses each checklist item and gives methodological background and published examples of transparent reporting. The STROBE checklist is best used in conjunction with this article (freely available on the Web sites of PLoS Medicine at <http://www.plosmedicine.org/>, Annals of Internal Medicine at <http://www.annals.org/>, and Epidemiology at <http://www.epidem.com/>). Information on the STROBE Initiative is available at [www.strobe-statement.org](http://www.strobe-statement.org).

1  
2  
3 **The long-term effects of occupational exposure to vinyl chloride monomer**  
4  
5 **on microcirculation: a cross-sectional study 15 years after retirement**  
6  
7  
8  
9

10  
11  
12  
13 Vincent Lopez <sup>1</sup>, Alain Chamoux <sup>1</sup>, Marion Tempier <sup>2</sup>, H el ene Thiel <sup>3</sup>, Sylvie Ughetto <sup>4</sup>,  
14  
15 Marion Trousselard <sup>5</sup>, Geraldine Naughton <sup>6</sup>, Fr ed eric Dutheil <sup>1,6,7,\*</sup>  
16  
17

18  
19  
20 <sup>1</sup> Occupational Medicine, University Hospital CHU G. Montpied, 63000 Clermont-Ferrand,  
21  
22 France

23  
24 <sup>2</sup> Radiopharmacy, University Hospital CHU G. Montpied, 63000 Clermont-Ferrand, France

25  
26 <sup>3</sup> Vascular Medicine, University Hospital CHU G. Montpied, 63000 Clermont-Ferrand,  
27  
28 France

29  
30  
31 <sup>4</sup> Department of Medical Information - Clinical research and innovation direction, University  
32  
33 Hospital CHU G. Montpied, 63000 Clermont-Ferrand, France

34  
35 <sup>5</sup> Neurophysiology of emotions, ENOP department, CRSSA/IRBA, 38702 La Tronche,  
36  
37 France

38  
39  
40 <sup>6</sup> School of Exercise Science, Australian Catholic University, Locked Bag 4115 Fitzroy MDC  
41  
42 VIC 3065, Australia

43  
44 <sup>7</sup> Laboratory of Metabolic Adaptations to Exercise in Physiological and Pathological  
45  
46 conditions (AME2P, EA3533), 63000 Clermont-Ferrand, France

47  
48  
49  
50  
51 **\*Correspondance to** Fr ed eric Dutheil, Occupational Medicine, University Hospital CHU G.  
52  
53 Montpied, 63000 Clermont-Ferrand, France Tel: +33 6 88 22 48 48. Fax: +33 4 73 27 46 49.  
54  
55 fred\_dutheil@yahoo.fr.  
56  
57  
58  
59  
60

1  
2  
3 Running Title: Capillaroscopy post-exposure to VCM  
4

5 Words count for introduction methods results discussion conclusion: 2298  
6

7 Number of tables: 1  
8

9 Number of figures: 2  
10

11 Words count for abstract: 258  
12  
13  
14  
15  
16  
17  
18  
19  
20  
21  
22  
23  
24  
25  
26  
27  
28  
29  
30  
31  
32  
33  
34  
35  
36  
37  
38  
39  
40  
41  
42  
43  
44  
45  
46  
47  
48  
49  
50  
51  
52  
53  
54  
55  
56  
57  
58  
59  
60

For peer review only

## ABSTRACT

**Objectives:** To assess residual long-term microcirculation abnormalities by capillaroscopy, 15 years after retiring from occupational exposure to vinyl chloride monomer (VCM).

**Design:** Cross-sectional study.

**Setting:** Allier, one of the major area of PVC production in France.

**Participants:** We screened 761 (97% males) retired workers exposed to chemical toxics. Exposure to chemical other than VCM excluded potential participants.

**Primary and secondary outcomes measures:** These participants underwent a medical examination including a capillaroscopy, symptoms of Raynaud, and comorbidities, as well as a survey to determine exposure time, direct or indirect contact, type of occupation, smoking status and time after exposure. A double blind analysis of capillaroscopic images was done. A control group was matched in age, sex, type of occupation.

**Results:** 179/761 retired workers were only exposed to VCM at their work, with 21 meeting the inclusion criteria and included. Exposure time was  $29.8 \pm 1.9$  years and time after exposure was  $15.9 \pm 2.4$  years. Retired workers previously exposed to VCM had significantly higher capillaroscopic modifications than 35 controls: enlarged capillaries (19% vs. 0%,  $p < .001$ ), dystrophy (28.6% vs. 0%,  $p = .0012$ ), and augmented length (33% vs. 0%,  $p < .001$ ). Time exposure was linked with enlarged capillaries ( $R^2$  adjusted = 63%,  $p < .0001$ ). They also had higher symptoms of Raynaud (19% vs. 0%,  $p = .007$ ) without correlation with capillaroscopic modifications.

**Conclusion:** Although VCM exposure was already known to affect microcirculation, our study demonstrates residual long term abnormalities following an average of 15 years retirement, with a time-related exposure response. Symptoms of Raynaud, although statistically associated with exposure was not related to capillaroscopic modifications; its origin remains to be determined.

1  
2  
3 **Keywords** Exposition, Vinyl chloride monomer, Capillaroscopy, Raynaud  
4  
5  
6  
7  
8  
9  
10  
11  
12  
13  
14  
15  
16  
17  
18  
19  
20  
21  
22  
23  
24  
25  
26  
27  
28  
29  
30  
31  
32  
33  
34  
35  
36  
37  
38  
39  
40  
41  
42  
43  
44  
45  
46  
47  
48  
49  
50  
51  
52  
53  
54  
55  
56  
57  
58  
59  
60

For peer review only

**ARTICLE SUMMARY****Article focus**

- Vinyl chloride monomer exposure induces microcirculation abnormalities, which can be diagnosed by capillaroscopy.
- Residual long-term abnormalities following retirement required investigation.

**Key messages**

- Our results demonstrated residual long-term abnormalities following an average of 15 years retirement, with a time-related exposure response.
- Symptoms of Raynaud, although statistically associated with exposure, was not related to capillaroscopic modifications; its origin remains to be determined.

**Strengths and limitations of this study**

- The strong points is that this study had a rigorous selection criteria of exclusively VCM exposed participants avoided confounding factor and the focus on retired workers at least 15 years after the end of occupational VCM exposure.
- The main limitation is that pathophysiology of Raynaud after VCM exposure remains unclear.

## INTRODUCTION

Vinyl chloride monomer (VCM) is primarily used in the manufacture of plastics and also serves as a raw material in organic synthesis. VCM is an aliphatic hydrocarbon also known as chloroethene. Its polymerization lead to a synthetic resin called polyvinyl chloride, commonly abbreviated PVC. PVC, is the third-most widely produced plastic, after polyethylene and polypropylene.<sup>1</sup> PVC can be made softer and more flexible by the addition of phthalates, and may also replace rubber. Thus, PVC is widely used including: pipes and water distribution, a substitute for painted wood (e.g. window frames, sills, flooring), electrical cable insulation, inflatable products, waterproof clothing (e.g. coats, skiing equipment, shoes), healthcare products (e.g. containers, tubing, catheters), food packaging, dental appliances and vinyl records.<sup>1</sup>

Harmless in its polymeric form, workers handling the finished PVC product are perfectly safe. In contrast, the at-risk phase lies in the manual descaling of autoclaves used for the polymerization where workers can contact it during its monomer state.<sup>2</sup> The chronic intoxication by gaseous monomer VCM is linked to several symptoms such as:<sup>3</sup> asthenia and dizziness,<sup>3</sup> Raynaud's syndrome,<sup>4 5</sup> digestive ulcers with nausea and anorexia,<sup>3</sup> systemic symptoms of arthralgia and myalgia<sup>3</sup>, trophic cutaneous symptoms and sclerosis. It has also been suspected in the onset of acroosteolysis<sup>4 6 7</sup> and hepatocellular carcinoma.<sup>8 9</sup> More generally, VCM exposure involves chromosomal aberrations and increased carcinogenic risk.<sup>10</sup> Even if VCM related diseases may have a genetic bases, they are also linked to prolonged occupational VCM exposure.<sup>5 11</sup>

Scleroderma-like microvascular abnormalities have been also described on exposed workers.<sup>12-14</sup> The most common and non-invasive means of investigating these abnormalities is capillaroscopy. Widespread identification of individuals most at risk could enable early detection and management strategy.<sup>15</sup> The residual effects of VCM on microcirculation have



1  
2  
3 been shown only once on 15 workers who had ceased their VCM exposure six months prior to  
4 testing.<sup>13</sup> However, residual long-term abnormalities following retirement are unknown. Our  
5  
6 hypothesis was higher capillaroscopic abnormalities in the VCM exposed group than in the  
7  
8 control group.  
9

10  
11 Therefore, the aim of our cross-sectional study was to investigate residual long-term  
12  
13 capillaroscopic abnormalities following retirement, after 15 years without VCM exposure.  
14  
15

## 16 17 18 19 20 21 **METHODS**

### 22 23 **Participants**

24  
25 We enrolled male retired workers exposed to VCM in PVC production. They provided written  
26  
27 informed consent. The study was approved by the human ethics committees from Clermont-  
28  
29 Ferrand university hospital, France. To be eligible, participants had to be: male (due to male  
30  
31 dominance in this workforce), retired, aged over 60 years, with at least a 5-year occupational  
32  
33 exposure to VCM, a time after VCM exposure of at least 5 years, and no exposure to  
34  
35 chemicals other than VCM. Moreover, participants with diabetes mellitus were also excluded  
36  
37 as it may interfere with microcirculation,<sup>16-21</sup> as well as individuals declaring the use or  
38  
39 previous use of treatments which may alter microcirculation.  
40  
41

42  
43 Participants responded to a survey to determine exposure time, direct or indirect contact, type  
44  
45 of occupation, time after exposure and smoking history. They underwent a medical  
46  
47 examination including a capillaroscopy, symptoms of Raynaud, and comorbidities such as  
48  
49 pathologies that may interfere with microcirculation (arterial hypertension, dyslipidemia) or  
50  
51 pathologies potentially linked with VCM exposure (cardiovascular or respiratory diseases).<sup>22</sup>  
52  
53  
54  
55  
56  
57  
58  
59  
60

1  
2  
3 A control group was matched in age, sex, type of occupation. They were recruited via  
4 advertisements. Selection criteria for this group also included no occupational or leisure  
5 chemical exposure, and no diabetes mellitus.<sup>16-21</sup>  
6  
7  
8  
9

### 10 11 12 **Capillaroscopy**

13 A nailfold capillaroscopy was performed on all fingers of each patient, excluding thumbs.<sup>23</sup>  
14 The nailfold capillaroscopies of the fingers were captured in images and electronically stored.  
15 The same investigator conducted all the capillaroscopies. A double blind analysis of  
16 capillaroscopic images was completed on deidentified data.  
17  
18  
19  
20  
21  
22

23 The outcomes were the five following classical criteria used in capillaroscopy: density,  
24 length, diameter, dystrophy and hemorrhage. Criteria for abnormalities were defined as:  
25 decreased capillary density  $<10/\text{mm}$  (avascular zone  $<7/\text{mm}$ ),<sup>24</sup> augmented capillary length  
26  $>300\mu\text{m}$ ,<sup>24 25</sup> increased capillary diameter  $>25\mu\text{m}$ <sup>25</sup> (megacapillary  $>50\mu\text{m}$ )<sup>26 27</sup>, and  
27 dystrophy was associated with capillary branching  $>15\%$ .<sup>28</sup> Hemorrhage is defined as the  
28 microvascular extravasation of the red blood cells linked to the damage of the vessel wall.<sup>27</sup>  
29  
30  
31  
32  
33  
34  
35  
36  
37  
38

### 39 **Statistics**

40 Data are presented as mean percentage change and standard deviation (SD).

41 The main judgment criterion for abnormal microcirculation was the presence of at least one  
42 abnormality in capillaroscopy. The most common abnormality is capillary dystrophy.<sup>25</sup>  
43 Previous data<sup>2 25</sup> and personal observation on residual long-term abnormalities following  
44 VCM exposure showed that a percentage of dystrophy of approximately 25% was required to  
45 differentiate between the exposed group and the controls. Using this value as the main  
46 outcome, we calculated that a sample of 10 participants per group allows a statistical power  
47 greater than 80% with an alpha level less than 5%.  
48  
49  
50  
51  
52  
53  
54  
55  
56  
57  
58  
59  
60

1  
2  
3 Statistical analyses were performed with SPSS software, v19. Correlations were used for  
4 inter-observer reliability. The Gaussian distribution for each parameter was assessed by a  
5 Shapiro-Wilk test. Comparisons between groups (exposed vs. control) were made through the  
6 usual tests: Chi2 test for categorical variables (or Fisher's exact test where appropriate) and  
7 Student's t test for quantitative variables (or Kruskal-Wallis if assumptions of normal  
8 distribution were violated). Significance was accepted for a p-value < 5%. The links between  
9 continuous variables were analyzed using linear regression. The links between binary and  
10 continuous variables were analyzed with logistic regression. Multivariate models were used to  
11 predict the relationship between capillary parameters and other parameters such as exposure  
12 time and time after exposure.  
13  
14  
15  
16  
17  
18  
19  
20  
21  
22  
23  
24  
25  
26  
27  
28

## 29 **RESULTS**

### 30 **Participants**

31  
32  
33  
34 We screened 761 (97% males) retired workers exposed to chemical toxics from two leading  
35 enterprises involved in PVC production (n=435 and n=91), as well as participants from many  
36 subcontracting companies (n=235), also known for VCM exposure. The strict selection  
37 criteria of exposure only to VCM reduced the sample size to 21 (figure 1).  
38  
39  
40  
41  
42  
43  
44

45 Thirty five age-matched controls were also recruited without occupational or leisure time  
46 exposure to chemical toxics.  
47  
48  
49

### 50 **Main capillaroscopic outcomes**

51  
52 There was no missing data. Inter-rater reliability was confirmed with correlations exceeding  
53 0.70 for each parameter. The mean of the values of the 2 investigators is presented in table 1.  
54  
55  
56  
57  
58  
59  
60

1  
2  
3 Concerning the qualitative data, when a disagreement occurred, the two observers analyzed  
4 again together and requested the opinion of a third expert. The disagreement occurred only for  
5  
6  
7 2 decreased capillary density <10/mm, and 1 capillary branching >15%.

8  
9 Compared with controls, retired workers previously exposed to VCM had higher  
10 capillaroscopic abnormalities: enlarged capillaries (0% vs. 19%,  $p<.001$ ), dystrophy (0% vs.  
11 28.6%,  $p=.0012$ ) (figure 2), and augmented length (0% vs. 33%,  $p<.001$ ). The mean length  
12 was 15% higher in the exposed group than in controls ( $p=.020$ ), as well as a 12% greater  
13 diameter of capillaries ( $p=.006$ ) (table 1).  
14  
15  
16  
17  
18  
19

### 20 21 22 23 **Exposure**

24 Exposure time was  $29.8\pm 1.9$  years and time after exposure was  $15.9\pm 2.4$  years. Time of  
25 exposure to VCM was strongly linked with enlarged capillaries ( $R^2$  adjusted = 63%,  $p<.0001$ )  
26 and modestly linked with capillary length ( $R^2 = 8\%$ ;  $p=.031$ ) (table 1). Age was not associated  
27 with capillaroscopic abnormalities. No multivariate models improved results from simple  
28 regressions.  
29  
30  
31  
32  
33  
34  
35  
36  
37  
38

### 39 **Symptoms of Raynaud**

40 VCM exposed group also had more symptoms of Raynaud (19% vs. 0%,  $p=.007$ ) independent  
41 of capillaroscopic modifications (table 1).  
42  
43  
44  
45  
46  
47

### 48 **Comorbidities and smoking**

49 Neither respiratory nor cardiovascular diseases were associated with VCM exposure.  
50 However, we combined both groups to explore potential associations between capillaroscopic  
51 parameters and high blood pressure, dyslipidemia, and smoking. Capillary length in  
52 participants medicated for arterial hypertension ( $n=20/61$ ) did not differ from participants  
53  
54  
55  
56  
57  
58  
59  
60

1  
2  
3 without hypertension. Participants treated with lipid lowering drugs with dyslipidemia  
4 (n=10/61) also showed a trend for a higher capillary length than participants without  
5 dyslipidemia (p=.079). Finally, there were no capillaroscopic difference between smokers and  
6  
7  
8  
9  
10  
11  
12  
13  
14  
15  
16  
17  
18  
19  
20  
21  
22  
23  
24  
25  
26  
27  
28  
29  
30  
31  
32  
33  
34  
35  
36  
37  
38  
39  
40  
41  
42  
43  
44  
45  
46  
47  
48  
49  
50  
51  
52  
53  
54  
55  
56  
57  
58  
59  
60

without hypertension. Participants treated with lipid lowering drugs with dyslipidemia (n=10/61) also showed a trend for a higher capillary length than participants without dyslipidemia (p=.079). Finally, there were no capillaroscopic difference between smokers and non smokers. However, smokers who had been exposed to VCM tended to have a higher capillary length than non smokers (p=.073).

## DISCUSSION

### Principal findings of the study

Changes in microcirculation persist for at least 15 years following occupational VCM exposure, with a time-related exposure response. Symptoms of Raynaud, although statistically associated with exposure, was not related to pathological capillaroscopic changes.

### What the study adds

The microcirculation changes following VCM exposure has been previously shown on 15 workers who ceased their occupational exposure six months prior to testing.<sup>13</sup> Our study supports these results over a longer period following VCM exposure – 15 years.

The dose responsiveness of VCM exposure and compromised capillarisation is generally,<sup>13</sup> but not always,<sup>12</sup> reported. Although daily VCM doses may have been more informative, the current study was restricted to years of exposure. Thus, we are limited to describing associations with an exposure time – response rather than a dose-response. Years of exposure is an easy question for physicians to ask of workers during risk assessment protocols.

The absence of changes in microcirculation on less exposed workers<sup>29</sup> resulted in a suggestion that a threshold of exposure exists. This finding is supported by previous studies showing that

1  
2  
3 long-term exposure (>8 years) induced greater chromosomal aberrations.<sup>10 30</sup> Further, not all  
4  
5 workers exposed to VCM develop microvascular abnormalities, suggestive of an underlying  
6  
7 genetic susceptibility (polymorphism of glutathione S-transferase).<sup>5 11</sup> A finding that female  
8  
9 VCM-exposed workers were more susceptible than males to the risk of increased  
10  
11 chromosome damage also reinforced genetic susceptibility theory.<sup>30</sup>  
12  
13

### 14 15 16 **Comparison with other studies**

17  
18 After 50 years of age, minor dystrophies could alter readability and interpretation of  
19  
20 capillaroscopic analyses.<sup>31</sup> Nevertheless, we controlled this parameter by matching the  
21  
22 exposed group and the controls on age and we conducted a double-blind analysis by two  
23  
24 experienced readers. Moreover, capillaroscopic abnormalities among workers exposed to  
25  
26 VCM in the present study were not influenced by age.<sup>13</sup>  
27  
28

29  
30 VCM has been suspected of causing respiratory and circulatory diseases.<sup>32</sup> However, similar  
31  
32 frequencies of these diseases in both groups do not support this hypothesis.

33  
34 Diabetes mellitus,<sup>16-21</sup> high blood pressure,<sup>18 33-35</sup> dyslipidemia,<sup>34</sup> or some  
35  
36 comorbidities/medications<sup>22</sup> could interfere with microcirculation. In line with previous  
37  
38 studies, we showed a diminished capillary length in participants treated for arterial  
39  
40 hypertension,<sup>18 33-35</sup> and a trend for participants treated with lipid lowering drugs.<sup>34</sup> Diabetes  
41  
42 mellitus was an exclusion criterion and thus, could not interfere with our results. Perhaps due  
43  
44 to low numbers of participants, our results failed to support previous findings of compromised  
45  
46 microcirculation in people with high blood pressure. The trend for increased capillary length  
47  
48 observed in our participants with dyslipidemia could be a response to increased peripheral  
49  
50 vascular resistance, in order to maintain their function of metabolic exchange.<sup>35</sup> Similarly,  
51  
52 smoking could induce a decrease in tissue perfusion,<sup>36</sup> and dystrophia.<sup>37</sup> We did not observe  
53  
54 differences between smokers and non-smokers, with the exception of a trend for abnormal  
55  
56  
57  
58  
59  
60

1  
2  
3 microcirculation among smokers exposed to VCM. The potential of a synergistic effect of  
4 tobacco and VCM-exposure warrants further investigations. It should be noted that VCM  
5 exposure in the current study was more strongly associated with compromised  
6 microcirculation than high blood pressure, dyslipidemia and smoking.  
7  
8

9  
10  
11 Previous research into the links between systemic sclerosis and VCM exposure is limited by  
12 single case design<sup>38</sup> and somewhat dated analyses of a population exposed to solvents.<sup>39</sup> The  
13 broader use of term such as solvents is less specific than the VCM exposure carefully isolated  
14 for investigation in the present study.  
15  
16

17  
18  
19 A higher prevalence of symptoms of Raynaud has been established in workers with VCM  
20 exposure,<sup>32</sup> up to one third of the exposed workers.<sup>13</sup> The comparison between studies with  
21 different selection criteria and different sample sizes is difficult. There is also the possibility  
22 of selection bias in non randomized recruitment. Within these limitations, our results support  
23 previous data, and extend knowledge by demonstrating the prevalence of symptoms of  
24 Raynaud remained higher at least 15 years following VCM exposure. Furthermore, in the  
25 current study, all the participants who suffered from symptoms of Raynaud had never taken  
26 medications or suffered from other diseases conducive to Raynaud.  
27  
28  
29  
30  
31  
32  
33  
34  
35  
36  
37  
38  
39  
40

#### 41 **Unanswered questions**

42  
43 Although symptoms of Raynaud are statistically associated with VCM exposure, we could not  
44 report a link with capillaroscopic modifications. The pathophysiology of Raynaud's  
45 phenomenon remains unknown. There seems to be primary or secondary vascular failure  
46 influenced by a hereditary factor.<sup>40</sup> Decreased perfusion pressure could be secondary to  
47 systemic hypotension or be caused by proximal arterial occlusion, influenced by many  
48 factors; both vascular and intra vascular, neural, environmental or hereditary.<sup>41</sup> Angiography  
49 of the hands of patients exposed to VCM showed occlusions, stenosis and narrowing of distal  
50  
51  
52  
53  
54  
55  
56  
57  
58  
59  
60

1  
2  
3 arteries with the development of collateral circulation.<sup>42</sup> Lack of statistical power in our study  
4  
5 could contribute to the lack of relationship between capillaroscopic changes and symptoms of  
6  
7 Raynaud.  
8  
9

### 10 11 12 **Strengths and limitations of study**

13  
14 This study presents some major strengths: a rigorous selection criteria of exclusively VCM  
15  
16 exposed participants avoided confounding factors, well-matched controls, a double blind  
17  
18 analyses, sufficient number of participants to detect the capillaroscopic differences between  
19  
20 groups, the focus on retired workers at least 15 years after the end of occupational VCM  
21  
22 exposure. The attendance rate of 30% (53 of 179 individuals exclusively exposed to VCM at  
23  
24 work agreed to participate in our study) seems very high compared with other studies<sup>43-47</sup>  
25  
26 taking into account their age (75 years), distance from the location of the medical examination  
27  
28 (averaging approximately 80 km), and that no financial compensation was offered.  
29

30  
31 There are limitations to this study: a cross-sectional design however, proof of concept was  
32  
33 important and achieved (with a possibility of longitudinal follow-up); differences in some but  
34  
35 not all capillary outcomes may be explained by a lack of power; the results are insufficient to  
36  
37 propose guidelines for all workers exposed to VCM; more accurate quantifiable measures of  
38  
39 VCM exposure are not available, however for the purpose of this study we used industry  
40  
41 established lists of exposure legally required in France; we combined our knowledge only use a  
42  
43 binary pathophysiology of Raynaud after VCM exposure remains unclear, most of the retired  
44  
45 workers exposed to VCM were from the same enterprise; and potentially more at-risk  
46  
47 manufacturing processes remained undetected.  
48  
49  
50  
51

### 52 53 54 55 56 57 **CONCLUSION**



1  
2  
3 Although VCM exposure was already known to affect microcirculation, our study  
4  
5 demonstrated the potential for residual long-term abnormalities following an average of 15  
6  
7 years retirement, with a time exposure – response. Symptoms of Raynaud, although  
8  
9 statistically associated with exposure were not associated with capillaroscopic modifications;  
10  
11 its origin remains to be determined. Future research could focus on other chemical products  
12  
13 which have a similar structure than VCM and more extensive research on type of occupations  
14  
15 at-risk of VCM exposure.  
16  
17  
18  
19  
20  
21  
22

### 23 **Role of the Funding Source**

24  
25 The Occupational Medicine department of CHU G. Montpied, Clermont-Ferrand, France  
26  
27 funded this study. No other funding source had a role in the design, conduct, or reporting of  
28  
29 the study.  
30  
31  
32  
33

### 34 **Contributors**

35  
36 VL has participated as a MD student and principal investigator. FD and AC obtained research  
37  
38 funding and generated the intellectual development of the study. FD knew potential exposed  
39  
40 workers to VCM. VL, FD, AC and SH contributed to the conception of the protocol. VL, FD  
41  
42 and SH made data analysis. VL, FD, MT contributed to manuscript drafting. VL recruited all  
43  
44 participants and performed all capillaroscopies. VL and MT completed the double blind  
45  
46 analyses of capillaroscopy. FD, AC, VL, GN and MT revised the manuscript. All authors read  
47  
48 and approved the final manuscript.  
49  
50  
51  
52  
53

### 54 **Acknowledgments**

55  
56  
57  
58  
59  
60

Our thanks to Geraldine Naughton for help with manuscript English proof reading. We also want to acknowledge the “Association of the sick from chemicals” (Association des Malades de la Chimie), 15 Av Albert Poncet 03410 Domerat, France, which helped us recruit the retired workers from VCM exposure.

## REFERENCES

- 1 Allsopp M, Giovanni G. Poly(Vinyl Chloride) *Ullmann's Encyclopedia of Industrial Chemistry* 2000.
- 2 Fontana L, Baietto M, Becker F, Catilina P. [Clinical and capillaroscopic study of Raynaud's phenomenon in retired patients previously exposed to vinyl chloride monomer]. *J Mal Vasc* 1995;20:268-73.
- 3 Veltman G, Lange CE, Juhe S, Stein G, Bachner U. Clinical manifestations and course of vinyl chloride disease. *Ann N Y Acad Sci* 1975;246:6-17.
- 4 Harris DK, Adams WG. Acro-osteolysis occurring in men engaged in the polymerization of vinyl chloride. *Br Med J* 1967;3:712-4.
- 5 Fontana L, Marion MJ, Ughetto S, Catilina P. Glutathione S-transferase M1 and GST T1 genetic polymorphisms and Raynaud's phenomenon in French vinyl chloride monomer-exposed workers. *J Hum Genet* 2006;51:879-86.
- 6 Preston BJ, Jones KL, Grainger RG. Clinical aspects of vinyl chloride disease: acro-osteolysis. *Proc R Soc Med* 1976;69:284-6.
- 7 Wilson RH, McCormick WE, Tatum CF, Creech JL. Occupational acroosteolysis. Report of 31 cases. *JAMA* 1967;201:577-81.
- 8 Dragani TA, Zocchetti C. Occupational exposure to vinyl chloride and risk of hepatocellular carcinoma. *Cancer Causes Control* 2008;19:1193-200.
- 9 Mundt KA, Dell LD, Austin RP, Luippold RS, Noess R, Bigelow C. Historical cohort study of 10 109 men in the North American vinyl chloride industry, 1942-72: update of cancer mortality to 31 December 1995. *Occup Environ Med* 2000;57:774-81.
- 10 Kumar AK, Balachandar V, Arun M et al. A Comprehensive Analysis of Plausible Genotoxic Covariates Among Workers of a Polyvinyl Chloride Plant Exposed to Vinyl Chloride Monomer. *Arch Environ Contam Toxicol* 2012.
- 11 Ji F, Zhu S, Sun P, Wang W. [Relationship between genetic polymorphisms of phase I and phase II metabolizing enzymes and DNA damage of workers exposed to vinyl chloride monomer]. *Wei Sheng Yan Jiu* 2009;38:7-11.
- 12 Langauer-Lewowicka H. Nailfold capillary abnormalities in polyvinyl chloride production workers. *Int Arch Occup Environ Health* 1983;51:337-40.
- 13 Maricq HR, Darke CS, Archibald RM, Leroy EC. In vivo observations of skin capillaries in workers exposed to vinyl chloride. An English-American comparison. *Br J Ind Med* 1978;35:1-7.
- 14 Maricq HR, Johnson MN, Whetstone CL, LeRoy EC. Capillary abnormalities in polyvinyl chloride production workers. Examination by in vivo microscopy. *JAMA* 1976;236:1368-71.

- 1  
2  
3 15 Kowal-Bielecka O, Bielecki M, Kowal K. Recent advances in the diagnosis and  
4 treatment of systemic sclerosis. *Polskie Archiwum Medycyny Wewnętrznej*  
5 2013;123:51-8.
- 6 16 Pazos-Moura CC, Moura EG, Bouskela E, Torres Filho IP, Breitenbach MM. Nailfold  
7 capillaroscopy in non-insulin dependent diabetes mellitus: blood flow velocity during  
8 rest and post-occlusive reactive hyperaemia. *Clin Physiol* 1990;10:451-61.
- 9 17 Iabichella ML, Mariotti R, Nuti M, Balbarini A, Mariani M. [Site specificity of  
10 biomicroscopic pattern in diabetic patients]. *Minerva Cardioangiol* 1999;47:619-21.
- 11 18 Lambova SN, Muller-Ladner U. The specificity of capillaroscopic pattern in  
12 connective autoimmune diseases. A comparison with microvascular changes in  
13 diseases of social importance: arterial hypertension and diabetes mellitus. *Mod*  
14 *Rheumatol* 2009;19:600-5.
- 15 19 Vayssairat M, Le Devehat C. [Critical analysis of vascular explorations in diabetic  
16 complications]. *J Mal Vasc* 2001;26:122-5.
- 17 20 Meyer MF, Pfohl M, Schatz H. [Assessment of diabetic alterations of microcirculation  
18 by means of capillaroscopy and laser-Doppler anemometry]. *Med Klin (Munich)*  
19 2001;96:71-7.
- 20 21 Chang CH, Tsai RK, Wu WC, Kuo SL, Yu HS. Use of dynamic capillaroscopy for  
21 studying cutaneous microcirculation in patients with diabetes mellitus. *Microvasc Res*  
22 1997;53:121-7.
- 23 22 Gallucci F, Russo R, Buono R, Acampora R, Madrid E, Uomo G. Indications and  
24 results of videocapillaroscopy in clinical practice. *Adv Med Sci* 2008;53:149-57.
- 25 23 Hern S, Mortimer PS. Visualization of dermal blood vessels--capillaroscopy. *Clin Exp*  
26 *Dermatol* 1999;24:473-8.
- 27 24 Ingegnoli F, Gualtierotti R, Lubatti C et al. Feasibility of different capillaroscopic  
28 measures for identifying nailfold microvascular alterations. *Seminars in Arthritis and*  
29 *Rheumatism* 2009;38:289-95.
- 30 25 Kabasakal Y, Elvins DM, Ring EF, McHugh NJ. Quantitative nailfold capillaroscopy  
31 findings in a population with connective tissue disease and in normal healthy controls.  
32 *Ann Rheum Dis* 1996;55:507-12.
- 33 26 Bhakuni DS, Vasdev V, Garg MK, Narayanan K, Jain R, Mullick G. Nailfold  
34 capillaroscopy by digital microscope in an Indian population with systemic sclerosis.  
35 *Int J Rheum Dis* 2012;15:95-101.
- 36 27 Cutolo M, Pizzorni C, Secchi ME, Sulli A. Capillaroscopy. *Best Pract Res Clin*  
37 *Rheumatol* 2008;22:1093-108.
- 38 28 Jouanny P, Schmidt C, Feldmann L, Schmitt J. [Focus on a quick reading of nailfold  
39 capillaroscopy]. *Journal des Maladies Vasculaires* 1994;19:206-9.
- 40 29 Przybylowski J, Podolecki A, Laks L et al. [Health status of workers in polyvinyl  
41 chloride processing plants. I. Evaluation of occupational exposure. Subjective and  
42 capillaroscopy studies. Conduction velocity in the motor nerves]. *Med Pr*  
43 1983;34:385-96.
- 44 30 Jiao J, Feng NN, Li Y et al. Estimation of a Safe Level for Occupational Exposure to  
45 Vinyl Chloride Using a Benchmark Dose Method in Central China. *J Occup Health*  
46 2012.
- 47 31 Carpentier PH. New techniques for clinical assessment of the peripheral  
48 microcirculation. *Drugs* 1999;59 Spec No:17-22.
- 49 32 Laplanche A, Clavel F, Contassot JC, Lanuziere C. Exposure to vinyl chloride  
50 monomer: report on a cohort study. *Br J Ind Med* 1987;44:711-5.
- 51 33 Prasad A, Dunnill GS, Mortimer PS, MacGregor GA. Capillary rarefaction in the  
52 forearm skin in essential hypertension. *J Hypertens* 1995;13:265-8.
- 53  
54  
55  
56  
57  
58  
59  
60

- 1  
2  
3 34 Bonacci E, Santacroce N, D'Amico N, Mattace R. Nail-fold capillaroscopy in the  
4 study of microcirculation in elderly hypertensive patients. *Arch Gerontol Geriatr*  
5 1996;22 Suppl 1:79-83.
- 6 35 Antonios TF, Singer DR, Markandu ND, Mortimer PS, MacGregor GA. Structural  
7 skin capillary rarefaction in essential hypertension. *Hypertension* 1999;33:998-1001.
- 8 36 Lehr HA. Microcirculatory dysfunction induced by cigarette smoking.  
9 *Microcirculation* 2000;7:367-84.
- 10 37 Lova RM, Miniati B, Macchi C et al. Morphologic changes in the microcirculation  
11 induced by chronic smoking habit: a videocapillaroscopic study on the human labial  
12 mucosa. *Am Heart J* 2002;143:658.
- 13 38 Betta A, Tommasini M, Bovenzi M, Barbone F, Versini W, Romeo L. [Scleroderma  
14 and occupational factors: a case-control study and analysis of literature]. *Medicina del*  
15 *Lavoro* 1994;85:496-506.
- 16 39 Ostlere LS, Harris D, Buckley C, Black C, Rustin MH. Atypical systemic sclerosis  
17 following exposure to vinyl chloride monomer. A case report and review of the  
18 cutaneous aspects of vinyl chloride disease. *Clinical and Experimental Dermatology*  
19 1992;17:208-10.
- 20 40 Block JA, Sequeira W. Raynaud's phenomenon. *Lancet* 2001;357:2042-8.
- 21 41 Herrick AL. The pathogenesis, diagnosis and treatment of Raynaud phenomenon. *Nat*  
22 *Rev Rheumatol* 2012;8:469-79.
- 23 42 Koischwitz D, Marsteller HJ, Lackner K, Brecht G, Brecht T. [Changes in the arteries  
24 in the hand and fingers due to vinyl chloride exposure (author's transl)]. *Rofo*  
25 1980;132:62-8.
- 26 43 Dutheil F, Kelly C, Biat I et al. [Relation between the level of knowledge and the rate  
27 of vaccination against the flu virus among the staff of the Clermont-Ferrand  
28 University hospital]. *Med Mal Infect* 2008;38:586-94.
- 29 44 Chiew M, Weber MF, Egger S, Sitas F. A cross-sectional exploration of smoking  
30 status and social interaction in a large population-based Australian cohort. *Social*  
31 *Science and Medicine* 2012;75:77-86.
- 32 45 Penforis A, San-Galli F, Cimino L, Huet D. Current insulin therapy in patients with  
33 type 2 diabetes: results of the ADHOC survey in France. *Diabetes and Metabolism*  
34 2011;37:440-5.
- 35 46 Heinavaara S, Tokola K, Kurttio P, Auvinen A. Validation of exposure assessment  
36 and assessment of recruitment methods for a prospective cohort study of mobile phone  
37 users (COSMOS) in Finland: a pilot study. *Environ Health* 2011;10:14.
- 38 47 Eriksen L, Gronbaek M, Helge JW, Tolstrup JS, Curtis T. The Danish Health  
39 Examination Survey 2007-2008 (DANHES 2007-2008). *Scand J Public Health*  
40 2011;39:203-11.
- 41  
42  
43  
44  
45  
46  
47  
48  
49  
50  
51  
52  
53  
54  
55  
56  
57  
58  
59  
60

**Table 1** Characteristics of participants, exposure to VCM and capillaroscopic outcomes.

|                                                                       | <b>Retired from<br/>exposure to VCM<br/>(n=21)</b> | <b>Controls<br/>(n=40)</b> | <b>p-<br/>value</b> |
|-----------------------------------------------------------------------|----------------------------------------------------|----------------------------|---------------------|
| <b>Age – years</b>                                                    | 74.4±2.9                                           | 76.3±3.2                   | NS                  |
| <b>type of occupation: blue collar<br/>workers – “manual”</b>         | 100%                                               | 100%                       | NS                  |
| <b>Exposure to VCM:</b>                                               |                                                    |                            |                     |
| direct contact with VCM                                               | 100%                                               | 0                          | <.001               |
| exposure time – years                                                 | 29.8±1.9                                           | 0                          | <.001               |
| time after exposure – years                                           | 15.9±2.4                                           | -                          | -                   |
| <b>Main capillaroscopic<br/>outcomes:</b>                             |                                                    |                            |                     |
| <b>1. density</b>                                                     |                                                    |                            |                     |
| mean density – mm                                                     | 8.6±0.4                                            | 8.8±0.3                    | NS                  |
| decreased capillary density<br><10/mm – n (%)                         | 9 (43)                                             | 16 (46)                    | NS                  |
| avascular zone <7/mm – n(%)                                           | 0                                                  | 0                          | NS                  |
| <b>2. length</b>                                                      |                                                    |                            |                     |
| mean length – µm                                                      | 291±14                                             | 254±9                      | .020                |
| augmented capillary length<br>>300µm – n(%)                           | 7 (33)                                             | 0                          | <.001               |
| <b>3. diameter</b>                                                    |                                                    |                            |                     |
| mean diameter of capillaries –<br>µm                                  | 28.9±0.9                                           | 25.7±0.6                   | .006                |
| enlarged capillaries >25µm –<br>n(%)                                  | 4 (19)                                             | 0                          | <.001               |
| megacapillary >50µm – n(%)                                            | 0                                                  | 0                          | NS                  |
| <b>4. dystrophy</b>                                                   |                                                    |                            |                     |
| capillary branching >15% –<br>n(%)                                    | 6 (29)                                             | 0                          | <.001               |
| <b>5. hemorrhage – n(%)</b>                                           |                                                    |                            |                     |
|                                                                       | 0                                                  | 0                          | NS                  |
| <b>Symptoms of Raynaud:</b>                                           |                                                    |                            |                     |
| n(%) with Raynaud                                                     | 4 (19)                                             | 0                          | .007                |
| Participants with medications<br>which could induce Raynaud –<br>n(%) | 2 (9)                                              | 4 (11)                     | NS                  |
| Other causes of Raynaud                                               | 0                                                  | 0                          | NS                  |
| <b>Comorbidities</b>                                                  |                                                    |                            |                     |
| Respiratory diseases                                                  | 2 (9)                                              | 6 (17)                     | NS                  |
| Cardiovascular diseases<br>(except high blood pressure)               | 4 (19)                                             | 5 (14)                     | NS                  |
| Myocardial infraction                                                 | 3 (14)                                             | 3(9)                       | NS                  |
| <b>Routine medications – n(%) of<br/>patients treated for:</b>        |                                                    |                            |                     |
| Blood pressure                                                        | 7 (33)                                             | 13 (37)                    | NS                  |
| Lipid lowering                                                        | 4 (19)                                             | 6 (17)                     | NS                  |
| <b>Smoking – n(%)</b>                                                 | 9 (43)                                             | 18 (51)                    | NS                  |

Figure 1 Participant flow chart.

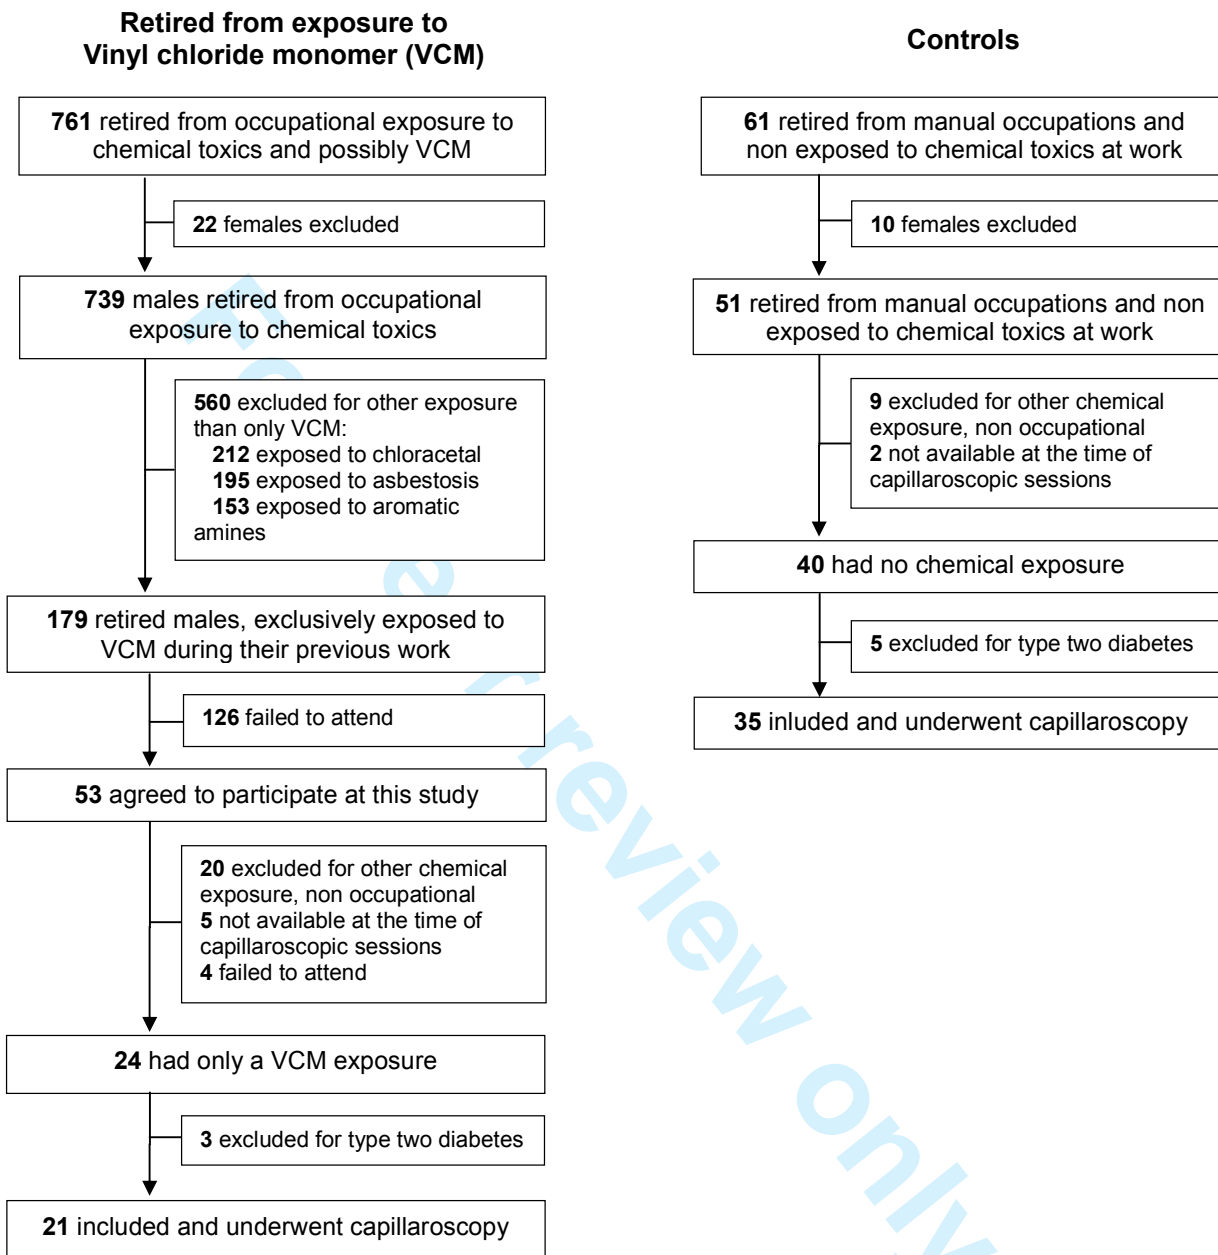

1  
2  
3 **Figure 2** Normal capillaroscopy on a control participant (A) and capillaroscopy with  
4 dystrophia >15% in a retired worker exposed to VCM for 37 years, with no treatment and no  
5 comorbidity, non smoking (B).  
6  
7  
8  
9

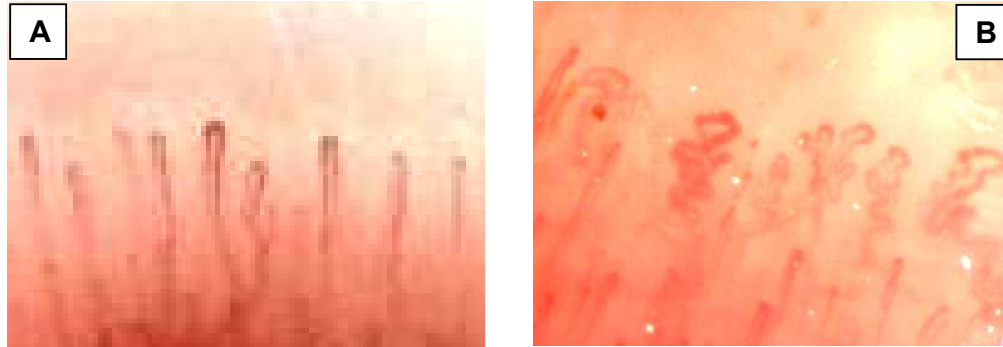

1  
2  
3  
4  
5  
6  
7 **The long-term effects of occupational exposure to vinyl chloride monomer**  
8  
9 **on microcirculation: a cross-sectional study 15 years after retirement**  
10

11  
12  
13  
14  
15 Vincent Lopez <sup>1</sup>, Alain Chamoux <sup>1</sup>, Marion Tempier <sup>2</sup>, H el ene Thiel <sup>3</sup>, Sylvie Ughetto <sup>4</sup>,  
16  
17 Marion Trousselard <sup>5</sup>, Geraldine Naughton <sup>6</sup>, Fr ed eric Dutheil <sup>1,6,7,\*</sup>  
18  
19

20  
21 <sup>1</sup> Occupational Medicine, University Hospital CHU G. Montpied, 63000 Clermont-Ferrand,  
22  
23 France  
24

25 <sup>2</sup> Radiopharmacy, University Hospital CHU G. Montpied, 63000 Clermont-Ferrand, France  
26

27 <sup>3</sup> Vascular Medicine, University Hospital CHU G. Montpied, 63000 Clermont-Ferrand,  
28  
29 France  
30

31 <sup>4</sup> Department of Medical Information - Clinical research and innovation direction, University  
32  
33 Hospital CHU G. Montpied, 63000 Clermont-Ferrand, France  
34

35 <sup>5</sup> Neurophysiology of emotions, ENOP department, CRSSA/IRBA, 38702 La Tronche,  
36  
37 France  
38

39 <sup>6</sup> School of Exercise Science, Australian Catholic University, Locked Bag 4115 Fitzroy MDC  
40  
41 VIC 3065, Australia  
42

43 <sup>7</sup> Laboratory of Metabolic Adaptations to Exercise in Physiological and Pathological  
44  
45 conditions (AME2P, EA3533), 63000 Clermont-Ferrand, France  
46  
47

48 **\*Correspondance to** Fr ed eric Dutheil, Occupational Medicine, University Hospital CHU G.  
49  
50 Montpied, 63000 Clermont-Ferrand, France Tel: +33 6 88 22 48 48. Fax: +33 4 73 27 46 49.  
51  
52 fred\_dutheil@yahoo.fr.  
53  
54  
55



1  
2  
3  
4  
5  
6  
7  
8  
9  
10  
11  
12  
13  
14  
15  
16  
17  
18  
19  
20  
21  
22  
23  
24  
25  
26  
27  
28  
29  
30  
31  
32  
33  
34  
35  
36  
37  
38  
39  
40  
41  
42  
43  
44  
45  
46  
47  
48  
49  
50  
51  
52  
53  
54  
55  
56  
57  
58  
59  
60

Running Title: Capillaroscopy post-exposure to VCM

Words count for introduction methods results discussion conclusion: 2298

Number of tables: 1

Number of figures: 2

Words count for abstract: 258

For peer review only

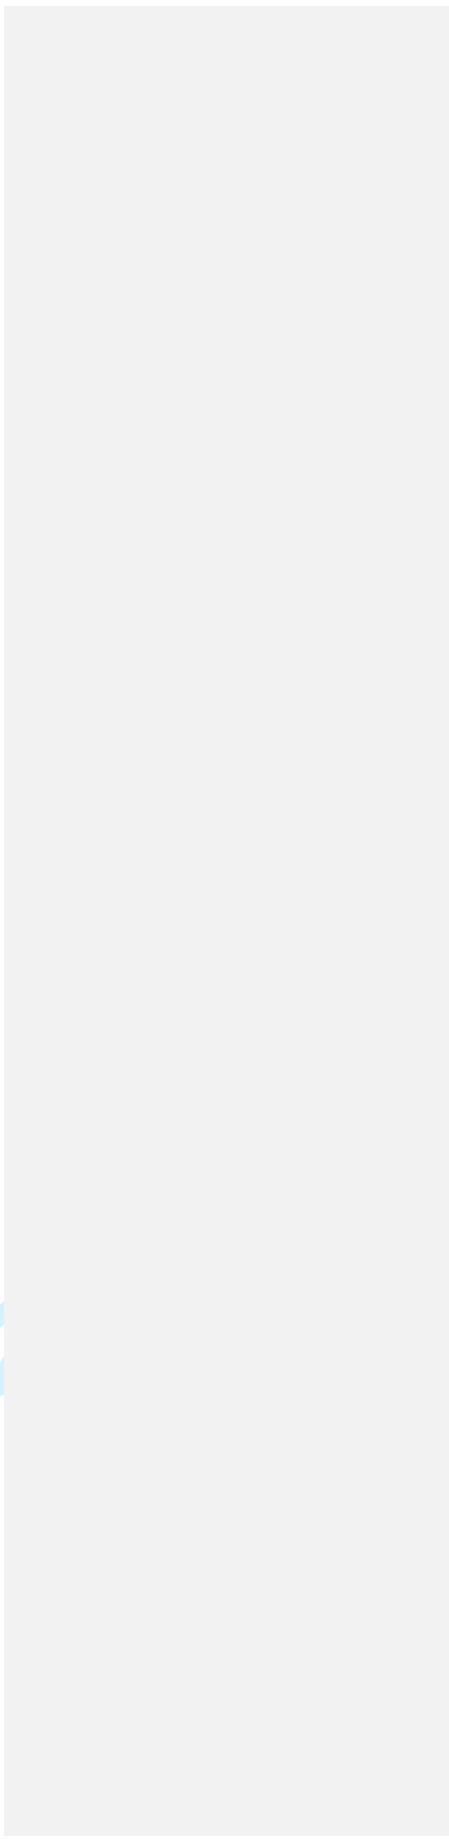

## ABSTRACT

**Objectives:** To assess residual long-term microcirculation abnormalities by capillaroscopy, 15 years after retiring from occupational exposure to vinyl chloride monomer (VCM).

**Design:** Cross-sectional study.

**Setting:** Allier, one of the major area of PVC production in France.

**Participants:** We ~~screened~~ ~~enrolled~~ 761 (97% males) ~~male~~ retired workers exposed to chemical toxics. Exposure to chemical other than VCM excluded potential participants.

**Primary and secondary outcomes measures:** These participants underwent a medical examination including a capillaroscopy, symptoms of Raynaud, and comorbidities, as well as a survey to determine exposure time, direct or indirect contact, type of occupation, smoking status and time after exposure. A double blind analysis of capillaroscopic images was done. A control group was matched in age, sex, type of occupation.

**Results:** 179/761 retired workers were only exposed to VCM at their work, with 21 meeting the inclusion criteria and included. Exposure time was  $29.8 \pm 1.9$  years and time after exposure was  $15.9 \pm 2.4$  years. Retired workers previously exposed to VCM had significantly higher capillaroscopic modifications than 35 controls: enlarged capillaries (19% vs. 0%,  $p < .001$ ), dystrophy (28.6% vs. 0%,  $p = .0012$ ), and augmented length (33% vs. 0%,  $p < .001$ ). Time exposure was linked with enlarged capillaries ( $R^2$  adjusted = 63.53%,  $p < .0001$ ). They also had higher symptoms of Raynaud (19% vs. 0%,  $p = .007$ ) without correlation with capillaroscopic modifications.

**Conclusion:** Although VCM exposure was already known to affect microcirculation, our study demonstrates residual long term abnormalities following an average of 15 years retirement, with a time-related exposure response. Symptoms of Raynaud, although statistically associated with exposure was not related to capillaroscopic modifications; its origin remains to be determined.

1  
2  
3  
4  
5  
6  
7  
8  
9  
10  
11  
12  
13  
14  
15  
16  
17  
18  
19  
20  
21  
22  
23  
24  
25  
26  
27  
28  
29  
30  
31  
32  
33  
34  
35  
36  
37  
38  
39  
40  
41  
42  
43  
44  
45  
46  
47  
48  
49  
50  
51  
52  
53  
54  
55  
56  
57  
58  
59  
60

**Keywords** Exposition, Vinyl chloride monomer, Capillaroscopy, Raynaud

For peer review only



**ARTICLE SUMMARY****Article focus**

- Vinyl chloride monomer exposure induces microcirculation abnormalities, which can be diagnosed by capillaroscopy.
- Residual long-term abnormalities following retirement required investigation.

**Key messages**

- Our results demonstrated residual long-term abnormalities following an average of 15 years retirement, with a time-related exposure response.
- Symptoms of Raynaud, although statistically associated with exposure, was not related to capillaroscopic modifications; its origin remains to be determined.

**Strengths and limitations of this study**

- The strong points is that this study had a rigorous selection criteria of exclusively VCM exposed participants avoided confounding factor and the focus on retired workers at least 15 years after the end of occupational VCM exposure.
- The main limitation is that pathophysiology of Raynaud after VCM exposure remains unclear.

## INTRODUCTION

Vinyl chloride monomer (VCM) is primarily used in the manufacture of plastics and also serves as a raw material in organic synthesis. VCM is an aliphatic hydrocarbon also known as chloroethene. Its polymerization lead to a synthetic resin called polyvinyl chloride, commonly abbreviated PVC. PVC, is the third-most widely produced plastic, after polyethylene and polypropylene.<sup>1</sup> PVC can be made softer and more flexible by the addition of phthalates, and may also replace rubber. Thus, PVC is widely used including: pipes and water distribution, a substitute for painted wood (e.g. window frames, sills, flooring), electrical cable insulation, inflatable products, waterproof clothing (e.g. coats, skiing equipment, shoes), healthcare products (e.g. containers, tubing, catheters), food packaging, dental appliances and vinyl records.<sup>1</sup>

Harmless in its polymeric form, workers handling the finished PVC product are perfectly safe.

In contrast, the at-risk phase lies in the manual descaling of autoclaves used for the polymerization where workers can contact it during its monomer state.<sup>2</sup> The chronic intoxication by gaseous monomer VCM is linked to several symptoms such as:<sup>3</sup> asthenia and dizziness,<sup>3</sup> Raynaud's syndrome,<sup>4</sup> <sup>5</sup> digestive ulcers with nausea and anorexia,<sup>3</sup> systemic symptoms of arthralgia and myalgia<sup>3</sup>, trophic cutaneous symptoms and sclerosis. It has also been suspected in the onset of acroosteolysis<sup>4</sup> <sup>6</sup> <sup>7</sup> and hepatocellular carcinoma.<sup>8</sup> <sup>9</sup> More generally, VCM exposure involves chromosomal aberrations and increased carcinogenic risk.<sup>10</sup> Even if VCM related diseases may have a genetic bases, they are also linked to prolonged occupational VCM exposure.<sup>5</sup> <sup>11</sup>

Scleroderma-like microvascular abnormalities have been also described on exposed workers.<sup>12-14</sup> The most common and non-invasive means of investigating these abnormalities is capillaroscopy. Widespread identification of individuals most at risk could enable early detection and management strategy~~treatment~~.<sup>15</sup> The residual effects of VCM on

1  
2  
3  
4  
5  
6  
7 microcirculation have been shown only once on 15 workers who had ceased their VCM  
8 exposure six months prior to testing.<sup>13</sup> However, residual long-term abnormalities following  
9 retirement are unknown. Our hypothesis was higher capillaroscopic abnormalities in the VCM  
10 exposed group than in the control group.  
11

12  
13  
14 Therefore, the aim of our cross-sectional study was to investigate residual long-term  
15 capillaroscopic abnormalities following retirement, after 15 years without VCM exposure.  
16  
17

## 18 19 20 21 22 **METHODS**

### 23 24 **Participants**

25  
26 We enrolled male retired workers exposed to VCM in PVC production. They provided written  
27 informed consent. The study was approved by the human ethics committees from Clermont-  
28 Ferrand university hospital, France. To be eligible, participants had to be: male (due to male  
29 dominance in this workforce), retired, aged over 60 years, with at least a 5-year occupational  
30 exposure to VCM, a time after VCM exposure of at least 5 years, and no exposure to  
31 chemicals other than VCM. Moreover, participants with diabetes mellitus were also excluded  
32 as it may interfere with microcirculation,<sup>16-21</sup> as well as individuals declaring the use or  
33 previous use of treatments which may alter microcirculation.  
34  
35  
36  
37  
38  
39  
40

41  
42 Participants responded to a survey to determine exposure time, direct or indirect contact, type  
43 of occupation, time after exposure and smoking history. They underwent a medical  
44 examination including a capillaroscopy, symptoms of Raynaud, and comorbidities such as  
45 pathologies that may interfere with microcirculation (arterial hypertension, dyslipidemia) or  
46 pathologies potentially linked with VCM exposure (cardiovascular or respiratory diseases).<sup>22</sup>  
47  
48  
49  
50  
51  
52  
53  
54  
55  
56

1  
2  
3  
4  
5  
6  
7 A control group was matched in age, sex, type of occupation. They were recruited via  
8 advertisements. Selection criteria for this group also included no occupational or leisure  
9 chemical exposure, and no diabetes mellitus.<sup>16-21</sup>

Field Code Changed

### 14 15 **Capillaroscopy**

16 A nailfold capillaroscopy was performed on all fingers of each patient, excluding thumbs.<sup>23</sup>

Field Code Changed

17 The nailfold capillaroscopies of the fingers were captured in images and electronically stored.

18 The same investigator conducted all the capillaroscopies. A double blind analysis of  
19 capillaroscopic images was completed on deidentified data.

20 The outcomes were the five following classical criteria used in capillaroscopy:<sup>23</sup> density,  
21 length, diameter, dystrophy and hemorrhage. Criteria for abnormalities were defined as:  
22 decreased capillary density <10/mm (avascular zone <7/mm),<sup>24</sup> augmented capillary length  
23 >300µm,<sup>24</sup> <sup>25</sup>—increased capillary diameter >2530µm<sup>25</sup> (megacapillary >50µm)<sup>26</sup> <sup>27</sup>, and  
24 dystrophy was associated with capillary branching >15%.<sup>28</sup> Hemorrhage is defined as the  
25 microvascular extravasation of the red blood cells linked to the damage of the vessel wall.<sup>27</sup>

Formatted: Font: Not Italic

### 38 **Statistics**

39 Data are presented as mean percentage change and standard deviation (SD).

40 The main judgment criterion for abnormal microcirculation was the presence of at least one  
41 abnormality in capillaroscopy. The most common abnormality is capillary dystrophy.<sup>25</sup>

42 Previous data<sup>2</sup> <sup>25</sup> and personal observation on residual long-term abnormalities following  
43 VCM exposure showed that a percentage of dystrophy of approximately 25% was required to  
44 differentiate between the exposed group and the controls. Using this value as the main  
45 outcome, we calculated that a sample of 10 participants per group allows a statistical power  
46 greater than 80% with an alpha level less than 5%.

1  
2  
3  
4  
5  
6  
7 Statistical analyses were performed with SPSS software, v19. Correlations were used for  
8 inter-observer reliability. The Gaussian distribution for each parameter was assessed by a  
9  
10 Shapiro-Wilk test. Comparisons between groups (exposed vs. control) were made through the  
11  
12 usual tests: Chi2 test for categorical variables (or Fisher's exact test where appropriate) and  
13  
14 Student's t test for quantitative variables (or Kruskal-Wallis if assumptions of normal  
15  
16 distribution were violated). Significance was accepted for a p-value < 5%. A matrix of the  
17 correlations between the outcomes and exposure was determined using a non-parametric  
18 Spearman test. The links between continuous variables were analyzed using linear regression.  
19  
20 The links between b-inary and continuous variables were analyzed with logistic regression.  
21  
22  
23  
24 Multivariate models were used to predict the relationship between capillary parameters and  
25  
26 other parameters such as exposure time and time after exposure.  
27  
28  
29  
30  
31

Formatted: Highlight

## 32 RESULTS

### 33 34 35 Participants

36  
37 We screened enrolled-761 (97% males) retired workers exposed to chemical toxics from two  
38  
39 leading enterprises involved in PVC production (n=435 and n=91), as well as participants  
40  
41 from many subcontracting companies (n=235), also known for VCM exposure. The strict  
42  
43 selection criteria of exposure only to VCM reduced the sample size to 21 (figure 1).  
44

45 Thirty five age-matched controls were also recruited without occupational or leisure time  
46  
47 exposure to chemical toxics.  
48

### 49 50 Main capillaroscopic outcomes



1  
2  
3  
4  
5  
6  
7  
8  
9  
10  
11  
12  
13  
14  
15  
16  
17  
18  
19  
20  
21  
22  
23  
24  
25  
26  
27  
28  
29  
30  
31  
32  
33  
34  
35  
36  
37  
38  
39  
40  
41  
42  
43  
44  
45  
46  
47  
48  
49  
50  
51  
52  
53  
54  
55  
56  
57  
58  
59  
60

There was no missing data. ~~Double blinded analysis showed no statistical difference between the two investigators.~~ Inter-rater reliability was confirmed with correlations exceeding 0.70 for each parameter. The mean of the values of the 2 investigators is presented in table 1. Concerning the qualitative data, when a disagreement occurred, the two observers analyzed again together and requested the opinion of a third expert. The disagreement occurred only for 2 decreased capillary density <10/mm, and 1 capillary branching >15%.

Compared with controls, retired workers previously exposed to VCM had higher capillaroscopic abnormalities: enlarged capillaries (0% vs. 19%,  $p<.001$ ), dystrophy (0% vs. 28.6%,  $p=.0012$ ) (figure 2), and augmented length (0% vs. 33%,  $p<.001$ ). The mean length was 15% higher in the exposed group than in controls ( $291\pm 14\mu$  vs.  $254\pm 9\mu$ ,  $p=.020$ ), as well as a 12% greater the mean diameter of capillaries ( $28.9\pm 0.9\mu$  vs.  $25.7\pm 0.6\mu$ ,  $p=.006$ ) (table 1).

### Exposure

Exposure time was  $29.8\pm 1.9$  years and time after exposure was  $15.9\pm 2.4$  years. Time of exposure to VCM was strongly linked with enlarged capillaries ( $R^2$  adjusted = ~~63.53%~~,  $p<.0001$ ) and modestly linked with capillary length ( $R^2$  ~~adjusted~~ = 8%;  $p=.031$ ) (table 1). Age was not associated with capillaroscopic abnormalities. No multivariate models improved results from simple regressions.

### Symptoms of Raynaud

VCM exposed group also had more symptoms of Raynaud (19% vs. 0%,  $p=.007$ ) independent of capillaroscopic modifications (table 1).

### Comorbidities and smoking

Neither respiratory nor cardiovascular diseases were associated with VCM exposure. However, we combined both groups to explore potential associations between capillaroscopic parameters and high blood pressure, dyslipidemia, and smoking. Capillary length in participants medicated for arterial hypertension (n=20/61) did not differ from participants without hypertension. Participants treated with lipid lowering drugs with dyslipidemia (n=10/61) also showed a trend for a higher capillary length than participants without dyslipidemia (p=.079). Finally, there were no capillaroscopic difference between smokers and non smokers. However, smokers who had been exposed to VCM tended to have a higher capillary length than non smokers (p=.073).

## DISCUSSION

### Principal findings of the study

Changes in microcirculation persist for at least 15 years following occupational VCM exposure, with a time-related exposure response. Symptoms of Raynaud, although statistically associated with exposure, was not related to pathological capillaroscopic changes.

### What the study adds

The microcirculation changes following VCM exposure has been previously shown on 15 workers who ceased their occupational exposure six months prior to testing.<sup>13</sup> Our study supports these results over a longer period following VCM exposure – 15 years.

The dose responsiveness of VCM exposure and compromised capillarisation is generally,<sup>13</sup> but not always,<sup>12</sup> well reported~~accepted~~.<sup>13</sup> Although daily VCM doses may have been more

Field Code Changed

1  
2  
3  
4  
5  
6  
7  
8  
9  
10  
11  
12  
13  
14  
15  
16  
17  
18  
19  
20  
21  
22  
23  
24  
25  
26  
27  
28  
29  
30  
31  
32  
33  
34  
35  
36  
37  
38  
39  
40  
41  
42  
43  
44  
45  
46  
47  
48  
49  
50  
51  
52  
53  
54  
55  
56  
57  
58  
59  
60

informative, the current study was restricted to years of exposure. Thus, we are limited to describing associations with an exposure time – response rather than a dose-response. Years of exposure is an easy question for physicians to ask of workers during risk assessment protocols.

Formatted: Not Highlight

Formatted: Not Highlight

The absence of changes in microcirculation on less exposed workers<sup>29</sup> resulted in a suggestion that a threshold of exposure exists. This finding is supported by previous studies showing that long-term exposure (>8 years) induced greater chromosomal aberrations.<sup>10 30</sup> Further, not all workers exposed to VCM develop microvascular abnormalities, suggestive of an underlying genetic susceptibility (polymorphism of glutathione S-transferase).<sup>5 11</sup> A finding that female VCM-exposed workers were more susceptible than males to the risk of increased chromosome damage also reinforced genetic susceptibility theory.<sup>30</sup>

### Comparison with other studies

After 50 years of age, minor dystrophies could alter readability and interpretation of capillaroscopic analyses.<sup>31</sup> Nevertheless, we controlled this parameter by matching the exposed group and the controls on age and we conducted a double-blind analysis by two experienced readers. Moreover, capillaroscopic abnormalities among workers exposed to VCM in the present study were not influenced by age.<sup>13</sup>

Field Code Changed

VCM has been suspected of causing respiratory and circulatory diseases.<sup>32</sup> However, similar frequencies of these diseases in both groups do not support this hypothesis.

Field Code Changed

Field Code Changed

Diabetes mellitus,<sup>16-21</sup> high blood pressure,<sup>18 33-35</sup> dyslipidemia,<sup>34</sup> or some comorbidities/medications<sup>22</sup> could interfere with microcirculation. In line with previous studies, we showed a diminished capillary length in participants treated for arterial hypertension,<sup>18 33-35</sup> and a trend for participants treated with lipid lowering drugs.<sup>34</sup> Diabetes mellitus was an exclusion criterion and thus, could not interfere with our results. Perhaps due

Field Code Changed

1  
2  
3  
4  
5  
6  
7 to low numbers of participants, our results failed to support previous findings of compromised  
8 microcirculation in people with high blood pressure. The trend for increased capillary length  
9 observed in our participants with dyslipidemia could be a response to increased peripheral  
10 vascular resistance, in order to maintain their function of metabolic exchange.<sup>35</sup> Similarly,  
11 smoking could induce a decrease in tissue perfusion,<sup>36</sup> and dystrophia.<sup>37</sup> We did not observe  
12 differences between smokers and non-smokers, with the exception of a trend for abnormal  
13 microcirculation among smokers exposed to VCM. The potential of a synergistic effect of  
14 tobacco and VCM-exposure warrants further investigations. It should be noted that VCM  
15 exposure in the current study was more strongly associated with compromised  
16 microcirculation than high blood pressure, dyslipidemia and smoking.  
17  
18  
19  
20  
21  
22  
23  
24  
25

26 Previous research into the links between systemic sclerosis and VCM exposure is limited by  
27 single case design<sup>38</sup> and somewhat dated analyses of a population exposed to solvents.<sup>39</sup> The  
28 broader use of term such as solvents is less specific than the VCM exposure carefully isolated  
29 for investigation in the present study.  
30  
31  
32

33 AA higher prevalence of symptoms of Raynaud has been established in workers with VCM  
34 exposure,<sup>32</sup> up to one third of the exposed workers.<sup>13</sup> The comparison between studies with  
35 different selection criteria and different sample sizes is difficult. There is also the possibility  
36 of selection bias in non randomized recruitment. Within these limitations, o  
37 Our results  
38 support previous these data, and extend knowledge by demonstrating the prevalence of  
39 symptoms of Raynaud remained higher at least 15 years following VCM exposure.  
40  
41 Furthermore, in the current study, all the participants who suffered from symptoms of  
42 Raynaud had never taken medications or suffered from other diseases conducive to Raynaud.  
43  
44  
45  
46  
47  
48  
49  
50

#### 51 **Unanswered questions**

52  
53  
54  
55  
56  
57  
58  
59  
60

Field Code Changed

1  
2  
3  
4  
5  
6  
7 Although symptoms of Raynaud are statistically associated with VCM exposure, we could not  
8 report a link with capillaroscopic modifications. The pathophysiology of Raynaud's  
9 phenomenon remains unknown. There seems to be primary or secondary vascular failure  
10 influenced by a hereditary factor.<sup>40</sup> Decreased perfusion pressure could be secondary to  
11 systemic hypotension or be caused by proximal arterial occlusion, influenced by many  
12 factors; both vascular and intra vascular, neural, environmental or hereditary.<sup>41</sup> Angiography  
13 of the hands of patients exposed to VCM showed occlusions, stenosis and narrowing of distal  
14 arteries with the development of collateral circulation.<sup>42</sup> Lack of statistical power in our study  
15 could contribute to the lack of relationship between capillaroscopic changes and symptoms of  
16 Raynaud.  
17  
18  
19  
20  
21  
22  
23  
24  
25  
26  
27

Field Code Changed

Field Code Changed

Field Code Changed

### 28 **Strengths and limitations of study**

29 This study presents some major strengths: a rigorous selection criteria of exclusively VCM  
30 exposed participants avoided confounding factors, well-matched controls, a double blind  
31 analyses, sufficient number of participants to detect the capillaroscopic differences between  
32 groups, the focus on retired workers at least 15 years after the end of occupational VCM  
33 exposure. The attendance rate of 30% (53 of 179 individuals exclusively exposed to VCM at  
34 work agreed to participate in our study) seems very high compared with other studies<sup>43-47</sup>  
35 taking into account their age (75 years), distance from the location of the medical examination  
36 (averaging approximately 80 km), and that no financial compensation was offered.  
37  
38  
39  
40  
41  
42  
43  
44

45 There are limitations to this study: a cross-sectional design however, proof of concept was  
46 important and achieved (with a possibility of longitudinal follow-up); differences in some but  
47 not all capillary outcomes may be explained by a lack of power; the results are insufficient to  
48 propose guidelines for all workers exposed to VCM; more accurate quantifiable measures of  
49 VCM exposure are not available, however for the purpose of this study we used industry  
50  
51  
52  
53  
54  
55  
56  
57  
58  
59  
60

1  
2  
3  
4  
5  
6 established lists of exposure legally required in France; we combined our knowledge only use a  
7  
8 binary pathophysiology of Raynaud after VCM exposure remains unclear, most of the retired  
9  
10 workers exposed to VCM were from the same enterprise; and potentially more at-risk  
11  
12 manufacturing processes remained undetected.  
13

## 14 15 16 17 18 19 **CONCLUSION**

20  
21 Although VCM exposure was already known to affect microcirculation, our study  
22  
23 demonstrated the potential for residual long-term abnormalities following an average of 15  
24  
25 years retirement, with a time exposure – response. Symptoms of Raynaud, although  
26  
27 statistically associated with exposure were not associated with capillaroscopic modifications;  
28  
29 its origin remains to be determined. Future research could focus on other chemical products  
30  
31 which have a similar structure than VCM and more extensive research on type of occupations  
32  
33 at-risk of VCM exposure.  
34  
35  
36  
37  
38

## 39 **Role of the Funding Source**

40 The Occupational Medicine department of CHU G. Montpied, Clermont-Ferrand, France  
41  
42 funded this study. No other funding source had a role in the design, conduct, or reporting of  
43  
44 the study.  
45  
46  
47

## 48 **Contributors**

49 VL has participated as a MD student and principal investigator. FD and AC obtained research  
50  
51 funding and generated the intellectual development of the study. FD knew potential exposed  
52  
53 workers to VCM. VL, FD, AC and SH contributed to the conception of the protocol. VL, FD  
54  
55

1  
2  
3  
4  
5  
6  
7  
8  
9  
10  
11  
12  
13  
14  
15  
16  
17  
18  
19  
20  
21  
22  
23  
24  
25  
26  
27  
28  
29  
30  
31  
32  
33  
34  
35  
36  
37  
38  
39  
40  
41  
42  
43  
44  
45  
46  
47  
48  
49  
50  
51  
52  
53  
54  
55  
56  
57  
58  
59  
60

and SH made data analysis. VL, FD, MT contributed to manuscript drafting. VL recruited all participants and performed all capillaroscopies. VL and MT completed the double blind analyses of capillaroscopy. FD, AC, VL, GN and MT revised the manuscript. All authors read and approved the final manuscript.

### Acknowledgments

Our thanks to Geraldine Naughton for help with manuscript English proof reading. We also want to acknowledge the “Association of the sick from chemicals” (Association des Malades de la Chimie), 15 Av Albert Poncet 03410 Domerat, France, which helped us recruit the retired workers from VCM exposure.

### REFERENCES

- 1 Allsopp M, Giovanni G. Poly(Vinyl Chloride) *Ullmann's Encyclopedia of Industrial Chemistry* 2000.
- 2 Fontana L, Baietto M, Becker F, Catilina P. [Clinical and capillaroscopic study of Raynaud's phenomenon in retired patients previously exposed to vinyl chloride monomer]. *J Mal Vasc* 1995;20:268-73.
- 3 Veltman G, Lange CE, Juhe S, Stein G, Bachner U. Clinical manifestations and course of vinyl chloride disease. *Ann N Y Acad Sci* 1975;246:6-17.
- 4 Harris DK, Adams WG. Acro-osteolysis occurring in men engaged in the polymerization of vinyl chloride. *Br Med J* 1967;3:712-4.
- 5 Fontana L, Marion MJ, Ughetto S, Catilina P. Glutathione S-transferase M1 and GST T1 genetic polymorphisms and Raynaud's phenomenon in French vinyl chloride monomer-exposed workers. *J Hum Genet* 2006;51:879-86.
- 6 Preston BJ, Jones KL, Grainger RG. Clinical aspects of vinyl chloride disease: acro-osteolysis. *Proc R Soc Med* 1976;69:284-6.
- 7 Wilson RH, McCormick WE, Tatum CF, Creech JL. Occupational acroosteolysis. Report of 31 cases. *JAMA* 1967;201:577-81.
- 8 Dragani TA, Zocchetti C. Occupational exposure to vinyl chloride and risk of hepatocellular carcinoma. *Cancer Causes Control* 2008;19:1193-200.
- 9 Mundt KA, Dell LD, Austin RP, Luippold RS, Noess R, Bigelow C. Historical cohort study of 10 109 men in the North American vinyl chloride industry, 1942-72: update of cancer mortality to 31 December 1995. *Occup Environ Med* 2000;57:774-81.
- 10 Kumar AK, Balachandar V, Arun M et al. A Comprehensive Analysis of Plausible Genotoxic Covariates Among Workers of a Polyvinyl Chloride Plant Exposed to Vinyl Chloride Monomer. *Arch Environ Contam Toxicol* 2012.

Formatted: French (France)

- 1  
2  
3  
4  
5  
6  
7  
8  
9  
10  
11  
12  
13  
14  
15  
16  
17  
18  
19  
20  
21  
22  
23  
24  
25  
26  
27  
28  
29  
30  
31  
32  
33  
34  
35  
36  
37  
38  
39  
40  
41  
42  
43  
44  
45  
46  
47  
48  
49  
50  
51  
52  
53  
54  
55  
56  
57  
58  
59  
60
- 11 Ji F, Zhu S, Sun P, Wang W. [Relationship between genetic polymorphisms of phase I and phase II metabolizing enzymes and DNA damage of workers exposed to vinyl chloride monomer]. *Wei Sheng Yan Jiu* 2009;38:7-11.
- 12 Langauer-Lewowicka H. Nailfolds capillary abnormalities in polyvinyl chloride production workers. *Int Arch Occup Environ Health* 1983;51:337-40.
- 13 Maricq HR, Darke CS, Archibald RM, Leroy EC. In vivo observations of skin capillaries in workers exposed to vinyl chloride. An English-American comparison. *Br J Ind Med* 1978;35:1-7.
- 14 Maricq HR, Johnson MN, Whetstone CL, LeRoy EC. Capillary abnormalities in polyvinyl chloride production workers. Examination by in vivo microscopy. *JAMA* 1976;236:1368-71.
- 15 Kowal-Bielecka O, Bielecki M, Kowal K. Recent advances in the diagnosis and treatment of systemic sclerosis. *Polskie Archiwum Medycyny Wewnętrznej* 2013;123:51-8.
- 16 Pazos-Moura CC, Moura EG, Bouskela E, Torres Filho IP, Breitenbach MM. Nailfold capillaroscopy in non-insulin dependent diabetes mellitus: blood flow velocity during rest and post-occlusive reactive hyperaemia. *Clin Physiol* 1990;10:451-61.
- 17 Iabichella ML, Mariotti R, Nuti M, Balbarini A, Mariani M. [Site specificity of biomicroscopic pattern in diabetic patients]. *Minerva Cardioangiol* 1999;47:619-21.
- 18 Lambova SN, Muller-Ladner U. The specificity of capillaroscopic pattern in connective autoimmune diseases. A comparison with microvascular changes in diseases of social importance: arterial hypertension and diabetes mellitus. *Mod Rheumatol* 2009;19:600-5.
- 19 Vayssairat M, Le Devehat C. [Critical analysis of vascular explorations in diabetic complications]. *J Mal Vasc* 2001;26:122-5.
- 20 Meyer MF, Pfohl M, Schatz H. [Assessment of diabetic alterations of microcirculation by means of capillaroscopy and laser-Doppler anemometry]. *Med Klin (Munich)* 2001;96:71-7.
- 21 Chang CH, Tsai RK, Wu WC, Kuo SL, Yu HS. Use of dynamic capillaroscopy for studying cutaneous microcirculation in patients with diabetes mellitus. *Microvasc Res* 1997;53:121-7.
- 22 Gallucci F, Russo R, Buono R, Acampora R, Madrid E, Uomo G. Indications and results of videocapillaroscopy in clinical practice. *Adv Med Sci* 2008;53:149-57.
- 23 Hern S, Mortimer PS. Visualization of dermal blood vessels--capillaroscopy. *Clin Exp Dermatol* 1999;24:473-8.
- 24 Ingegnoli F, Gualtierotti R, Lubatti C et al. Feasibility of different capillaroscopic measures for identifying nailfold microvascular alterations. *Seminars in Arthritis and Rheumatism* 2009;38:289-95.
- 25 Kabasakal Y, Elvins DM, Ring EF, McHugh NJ. Quantitative nailfold capillaroscopy findings in a population with connective tissue disease and in normal healthy controls. *Ann Rheum Dis* 1996;55:507-12.
- 26 Bhakuni DS, Vasdev V, Garg MK, Narayanan K, Jain R, Mullick G. Nailfold capillaroscopy by digital microscope in an Indian population with systemic sclerosis. *Int J Rheum Dis* 2012;15:95-101.
- 27 Cutolo M, Pizzorni C, Secchi ME, Sulli A. Capillaroscopy. *Best Pract Res Clin Rheumatol* 2008;22:1093-108.
- 28 Jouanny P, Schmidt C, Feldmann L, Schmitt J. [Focus on a quick reading of nailfold capillaroscopy]. *Journal des Maladies Vasculaires* 1994;19:206-9.
- 29 Przybylowski J, Podolecki A, Laks L et al. [Health status of workers in polyvinyl chloride processing plants. I. Evaluation of occupational exposure. Subjective and

Formatted: French (France)

Formatted: French (France)

Formatted: French (France)



1  
2  
3  
4  
5  
6  
7  
8  
9  
10  
11  
12  
13  
14  
15  
16  
17  
18  
19  
20  
21  
22  
23  
24  
25  
26  
27  
28  
29  
30  
31  
32  
33  
34  
35  
36  
37  
38  
39  
40  
41  
42  
43  
44  
45  
46  
47  
48  
49  
50  
51  
52  
53  
54  
55  
56  
57  
58  
59  
60

capillaroscopy studies. Conduction velocity in the motor nerves]. *Med Pr* 1983;34:385-96.

Formatted: French (France)

- 30 Jiao J, Feng NN, Li Y et al. Estimation of a Safe Level for Occupational Exposure to Vinyl Chloride Using a Benchmark Dose Method in Central China. *J Occup Health* 2012.
- 31 Carpentier PH. New techniques for clinical assessment of the peripheral microcirculation. *Drugs* 1999;59 Spec No:17-22.
- 32 Laplanche A, Clavel F, Contassot JC, Lanouziere C. Exposure to vinyl chloride monomer: report on a cohort study. *Br J Ind Med* 1987;44:711-5.
- 33 Prasad A, Dunnill GS, Mortimer PS, MacGregor GA. Capillary rarefaction in the forearm skin in essential hypertension. *J Hypertens* 1995;13:265-8.
- 34 Bonacci E, Santacroce N, D'Amico N, Mattace R. Nail-fold capillaroscopy in the study of microcirculation in elderly hypertensive patients. *Arch Gerontol Geriatr* 1996;22 Suppl 1:79-83.
- 35 Antonios TF, Singer DR, Markandu ND, Mortimer PS, MacGregor GA. Structural skin capillary rarefaction in essential hypertension. *Hypertension* 1999;33:998-1001.
- 36 Lehr HA. Microcirculatory dysfunction induced by cigarette smoking. *Microcirculation* 2000;7:367-84.
- 37 Lova RM, Miniati B, Macchi C et al. Morphologic changes in the microcirculation induced by chronic smoking habit: a videocapillaroscopic study on the human labial mucosa. *Am Heart J* 2002;143:658.
- 38 Betta A, Tommasini M, Bovenzi M, Barbone F, Versini W, Romeo L. [Scleroderma and occupational factors: a case-control study and analysis of literature]. *Medicina del Lavoro* 1994;85:496-506.
- 39 Ostlere LS, Harris D, Buckley C, Black C, Rustin MH. Atypical systemic sclerosis following exposure to vinyl chloride monomer. A case report and review of the cutaneous aspects of vinyl chloride disease. *Clinical and Experimental Dermatology* 1992;17:208-10.
- 40 Block JA, Sequeira W. Raynaud's phenomenon. *Lancet* 2001;357:2042-8.
- 41 Herrick AL. The pathogenesis, diagnosis and treatment of Raynaud phenomenon. *Nat Rev Rheumatol* 2012;8:469-79.
- 42 Koischwitz D, Marsteller HJ, Lackner K, Brecht G, Brecht T. [Changes in the arteries in the hand and fingers due to vinyl chloride exposure (author's transl)]. *Rofo* 1980;132:62-8.
- 43 Duteil F, Kelly C, Biat I et al. [Relation between the level of knowledge and the rate of vaccination against the flu virus among the staff of the Clermont-Ferrand University hospital]. *Med Mal Infect* 2008;38:586-94.
- 44 Chiew M, Weber MF, Egger S, Sitas F. A cross-sectional exploration of smoking status and social interaction in a large population-based Australian cohort. *Social Science and Medicine* 2012;75:77-86.
- 45 Penforis A, San-Galli F, Cimino L, Huet D. Current insulin therapy in patients with type 2 diabetes: results of the ADHOC survey in France. *Diabetes and Metabolism* 2011;37:440-5.
- 46 Heinavaara S, Tokola K, Kurttio P, Auvinen A. Validation of exposure assessment and assessment of recruitment methods for a prospective cohort study of mobile phone users (COSMOS) in Finland: a pilot study. *Environ Health* 2011;10:14.
- 47 Eriksen L, Gronbaek M, Helge JW, Tolstrup JS, Curtis T. The Danish Health Examination Survey 2007-2008 (DANHES 2007-2008). *Scand J Public Health* 2011;39:203-11.

1  
2  
3  
4  
5  
6  
7  
8  
9  
10  
11  
12  
13  
14  
15  
16  
17  
18  
19  
20  
21  
22  
23  
24  
25  
26  
27  
28  
29  
30  
31  
32  
33  
34  
35  
36  
37  
38  
39  
40  
41  
42  
43  
44  
45  
46  
47  
48  
49  
50  
51  
52  
53  
54  
55  
56  
57  
58  
59  
60

For peer review only



**Table 1** Characteristics of participants, exposure to VCM and capillaroscopic outcomes.

|                                                                       | Retired from<br>exposure to VCM<br>(n=21) | Controls<br>(n=40)    | p-<br>value |
|-----------------------------------------------------------------------|-------------------------------------------|-----------------------|-------------|
| Age – years                                                           | 74.4±2.9                                  | 76.3±3.2              | NS          |
| type of occupation: blue collar<br>workers – “manual”                 | 100%                                      | 100%                  | NS          |
| <b>Exposure to VCM:</b>                                               |                                           |                       |             |
| direct contact with VCM                                               | 100%                                      | 0                     | <.001       |
| exposure time – years                                                 | 29.8±1.9                                  | 0                     | <.001       |
| time after exposure – years                                           | 15.9±2.4                                  | -                     | -           |
| <b>Main capillaroscopic<br/>outcomes:</b>                             |                                           |                       |             |
| <b>1. density</b>                                                     |                                           |                       |             |
| mean density – mm                                                     | 8.6±0.4                                   | 8.8±0.3               | NS          |
| decreased capillary density<br><10/mm – n (%)                         | 9 (43)                                    | 16 (46)               | NS          |
| avascular zone <7/mm – n(%)                                           | 0                                         | 0                     | NS          |
| <b>2. length</b>                                                      |                                           |                       |             |
| mean length – $\mu\text{m}$                                           | 291±14 <sup>†</sup>                       | 254±9 <sup>†</sup>    | .020        |
| augmented capillary length<br>>300 $\mu\text{m}$ – n(%)               | 7 (33)                                    | 0                     | <.001       |
| <b>3. diameter</b>                                                    |                                           |                       |             |
| mean diameter of capillaries –<br>$\mu\text{m}$                       | 28.9±0.9 <sup>†</sup>                     | 25.7±0.6 <sup>†</sup> | .006        |
| enlarged capillaries<br>>2530 $\mu\text{m}$ – n(%)                    | 4 (19)                                    | 0                     | <.001       |
| megacapillary >50 $\mu\text{m}$ – n(%)                                | 0                                         | 0                     | NS          |
| <b>4. dystrophy</b>                                                   |                                           |                       |             |
| capillary branching >15% –<br>n(%)                                    | 6 (29)                                    | 0                     | <.001       |
| <b>5. hemorrhage – n(%)</b>                                           |                                           |                       |             |
| 0                                                                     | 0                                         | 0                     | NS          |
| <b>Symptoms of Raynaud:</b>                                           |                                           |                       |             |
| n(%) with Raynaud                                                     | 4 (19)                                    | 0                     | .007        |
| Participants with medications<br>which could induce Raynaud –<br>n(%) | 2 (9)                                     | 4 (11)                | NS          |
| Other causes of Raynaud                                               | 0                                         | 0                     | NS          |
| <b>Comorbidities</b>                                                  |                                           |                       |             |
| Respiratory diseases                                                  | 2 (9)                                     | 6 (17)                | NS          |
| Cardiovascular diseases<br>(except high blood pressure)               | 4 (19)                                    | 5 (14)                | NS          |
| Myocardial infraction                                                 | 3 (14)                                    | 3(9)                  | NS          |
| <b>Routine medications – n(%) of<br/>patients treated for:</b>        |                                           |                       |             |
| Blood pressure                                                        | 7 (33)                                    | 13 (37)               | NS          |
| Lipid lowering                                                        | 4 (19)                                    | 6 (17)                | NS          |
| <b>Smoking – n(%)</b>                                                 | 9 (43)                                    | 18 (51)               | NS          |

Figure 1 Participant flow chart.

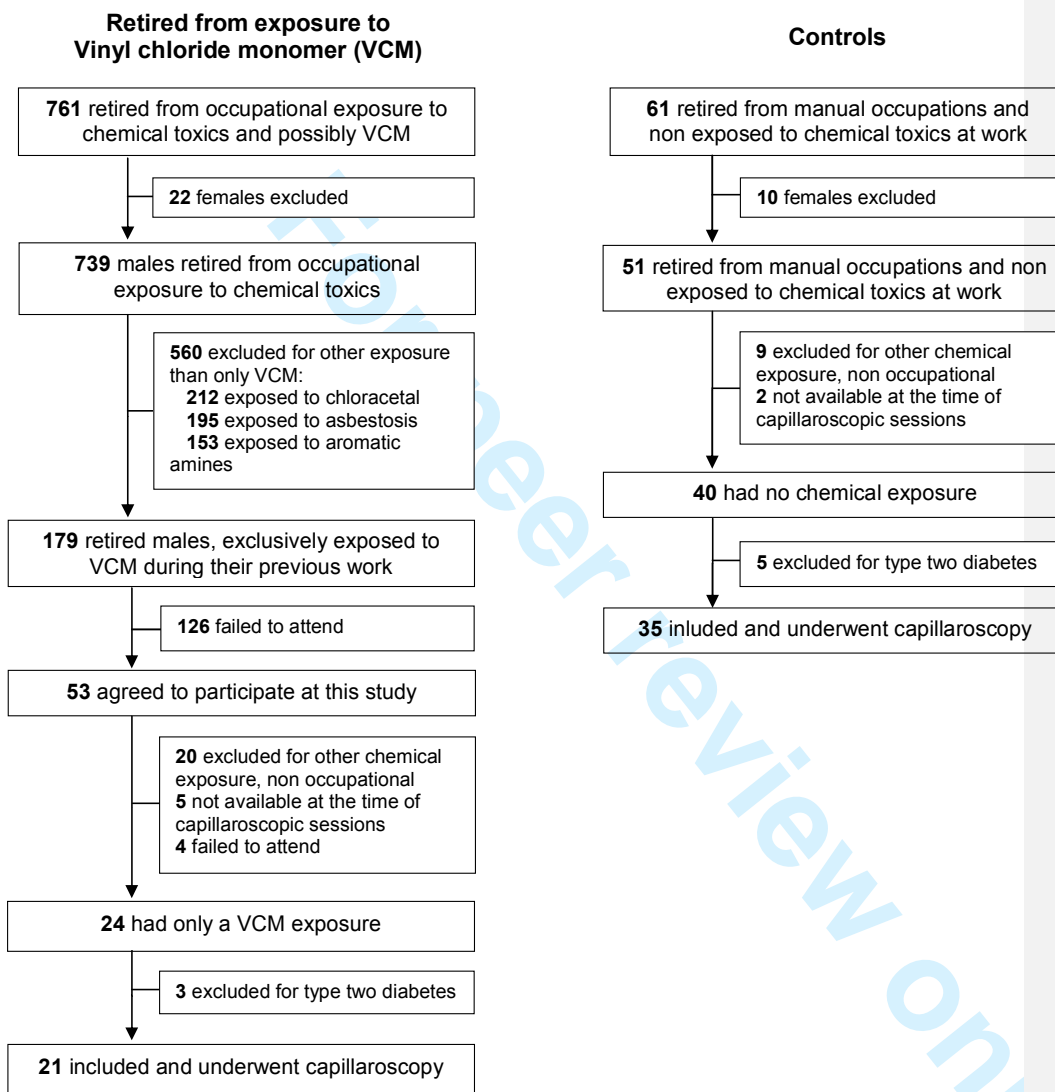

1  
2  
3  
4  
5  
6  
7  
8  
9  
10  
11  
12  
13  
14  
15  
16  
17  
18  
19  
20  
21  
22  
23  
24  
25  
26  
27  
28  
29  
30  
31  
32  
33  
34  
35  
36  
37  
38  
39  
40  
41  
42  
43  
44  
45  
46  
47  
48  
49  
50  
51  
52  
53  
54  
55  
56  
57  
58  
59  
60

**Figure 2** Normal capillaroscopy on a control participant (A) and capillaroscopy with dystrophia >15% in a retired worker exposed to VCM for 37 years, with no treatment and no comorbidity, non smoking (B).

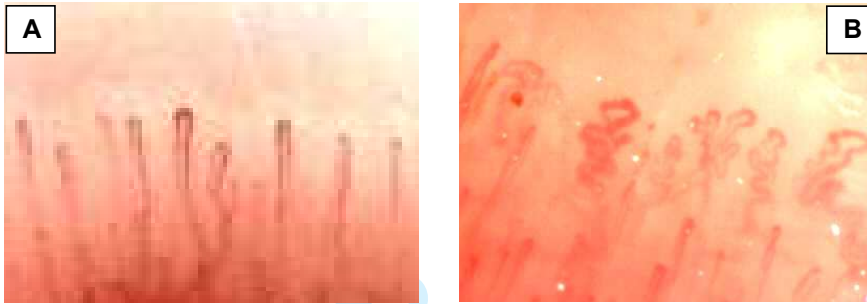

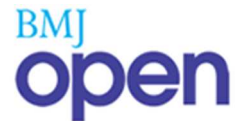

**The long-term effects of occupational exposure to vinyl chloride monomer on microcirculation: a cross-sectional study 15 years after retirement**

|                                 |                                                                                                                                                                                                                                                                                                                         |
|---------------------------------|-------------------------------------------------------------------------------------------------------------------------------------------------------------------------------------------------------------------------------------------------------------------------------------------------------------------------|
| Journal:                        | <i>BMJ Open</i>                                                                                                                                                                                                                                                                                                         |
| Manuscript ID:                  | bmjopen-2013-002785.R2                                                                                                                                                                                                                                                                                                  |
| Article Type:                   | Research                                                                                                                                                                                                                                                                                                                |
| Date Submitted by the Author:   | 23-Apr-2013                                                                                                                                                                                                                                                                                                             |
| Complete List of Authors:       | Lopez, Vincent; CHU G. Montpied, Chamoux, Alain; CHU G. Montpied, Tempier, Marion; CHU G. Montpied, Thiel, Helene; CHU G. Montpied, Ughetto, Sylvie; CHU G. Montpied, Trousselard, Marion; IRBA, Naughton, Geraldine; Australian Catholic University, School of Exercise Science<br>Dutheil, Frederic; CHU G. Montpied, |
| <b>Primary Subject Heading</b>: | Occupational and environmental medicine                                                                                                                                                                                                                                                                                 |
| Secondary Subject Heading:      | Public health                                                                                                                                                                                                                                                                                                           |
| Keywords:                       | OCCUPATIONAL & INDUSTRIAL MEDICINE, CHEMICAL PATHOLOGY, PUBLIC HEALTH                                                                                                                                                                                                                                                   |
|                                 |                                                                                                                                                                                                                                                                                                                         |

SCHOLARONE™  
Manuscripts

only

1  
2  
3 **The long-term effects of occupational exposure to vinyl chloride monomer**  
4  
5 **on microcirculation: a cross-sectional study 15 years after retirement**  
6  
7  
8  
9

10  
11  
12  
13 Vincent Lopez <sup>1</sup>, Alain Chamoux <sup>1</sup>, Marion Tempier <sup>2</sup>, H el ene Thiel <sup>3</sup>, Sylvie Ughetto <sup>4</sup>,  
14  
15 Marion Trousselard <sup>5</sup>, Geraldine Naughton <sup>6</sup>, Fr ed eric Dutheil <sup>1,6,7,\*</sup>  
16  
17

18  
19  
20 <sup>1</sup> Occupational Medicine, University Hospital CHU G. Montpied, 63000 Clermont-Ferrand,  
21  
22 France

23  
24 <sup>2</sup> Radiopharmacy, University Hospital CHU G. Montpied, 63000 Clermont-Ferrand, France

25  
26 <sup>3</sup> Vascular Medicine, University Hospital CHU G. Montpied, 63000 Clermont-Ferrand,  
27  
28 France

29  
30  
31 <sup>4</sup> Department of Medical Information - Clinical research and innovation direction, University  
32  
33 Hospital CHU G. Montpied, 63000 Clermont-Ferrand, France

34  
35 <sup>5</sup> Neurophysiology of emotions, ENOP department, CRSSA/IRBA, 38702 La Tronche,  
36  
37 France

38  
39  
40 <sup>6</sup> School of Exercise Science, Australian Catholic University, Locked Bag 4115 Fitzroy MDC  
41  
42 VIC 3065, Australia

43  
44 <sup>7</sup> Laboratory of Metabolic Adaptations to Exercise in Physiological and Pathological  
45  
46 conditions (AME2P, EA3533), 63000 Clermont-Ferrand, France

47  
48  
49  
50  
51 **\*Correspondance to** Fr ed eric Dutheil, Occupational Medicine, University Hospital CHU G.  
52  
53 Montpied, 63000 Clermont-Ferrand, France Tel: +33 6 88 22 48 48. Fax: +33 4 73 27 46 49.  
54  
55 fred\_dutheil@yahoo.fr.  
56  
57  
58  
59  
60

1  
2  
3 Running Title: Capillaroscopy post-exposure to VCM  
4

5 Words count for introduction methods results discussion conclusion: 2402  
6

7 Number of tables: 1  
8

9 Number of figures: 2  
10

11 Words count for abstract: 262  
12  
13  
14  
15  
16  
17  
18  
19  
20  
21  
22  
23  
24  
25  
26  
27  
28  
29  
30  
31  
32  
33  
34  
35  
36  
37  
38  
39  
40  
41  
42  
43  
44  
45  
46  
47  
48  
49  
50  
51  
52  
53  
54  
55  
56  
57  
58  
59  
60

For peer review only



## ABSTRACT

**Objectives:** To assess residual long-term microcirculation abnormalities by capillaroscopy, 15 years after retiring from occupational exposure to vinyl chloride monomer (VCM).

**Design:** Cross-sectional study.

**Setting:** Allier, one of the major area of PVC production in France.

**Participants:** We screened 761 (97% males) retired workers exposed to chemical toxics. Exposure to chemical other than VCM excluded potential participants.

**Primary and secondary outcomes measures:** These participants underwent a medical examination including a capillaroscopy, symptoms of Raynaud, and comorbidities, as well as a survey to determine exposure time, direct or indirect contact, type of occupation, smoking status and time after exposure. A double blind analysis of capillaroscopic images was done. A control group was matched in age, sex, type of occupation.

**Results:** 179/761 retired workers were only exposed to VCM at their work, with 21 meeting the inclusion criteria and included. Exposure time was  $29.8 \pm 1.9$  years and time after exposure was  $15.9 \pm 2.4$  years. Retired workers previously exposed to VCM had significantly higher capillaroscopic modifications than 35 controls: enlarged capillaries (19% vs. 0%,  $p < .001$ ), dystrophy (28.6% vs. 0%,  $p = .0012$ ), and augmented length (33% vs. 0%,  $p < .001$ ). Time exposure was linked ( $p < .0001$ ) with enlarged capillaries ( $R^2 = .63$ ), dystrophy ( $R^2 = .51$ ), and capillary length ( $R^2 = .36$ ). They also had higher symptoms of Raynaud (19% vs. 0%,  $p = .007$ ) without correlation with capillaroscopic modifications.

**Conclusion:** Although VCM exposure was already known to affect microcirculation, our study demonstrates residual long term abnormalities following an average of 15 years retirement, with a time-related exposure response. Symptoms of Raynaud, although statistically associated with exposure was not related to capillaroscopic modifications; its origin remains to be determined.

1  
2  
3 **Keywords** Exposition, Vinyl chloride monomer, Capillaroscopy, Raynaud  
4  
5  
6  
7  
8  
9  
10  
11  
12  
13  
14  
15  
16  
17  
18  
19  
20  
21  
22  
23  
24  
25  
26  
27  
28  
29  
30  
31  
32  
33  
34  
35  
36  
37  
38  
39  
40  
41  
42  
43  
44  
45  
46  
47  
48  
49  
50  
51  
52  
53  
54  
55  
56  
57  
58  
59  
60

For peer review only

## ARTICLE SUMMARY

### Article focus

- Vinyl chloride monomer exposure induces microcirculation abnormalities, which can be diagnosed by capillaroscopy.
- Residual long-term abnormalities following retirement required investigation.

### Key messages

- Our results demonstrated residual long-term abnormalities following an average of 15 years retirement, with a time-related exposure response.
- Symptoms of Raynaud, although statistically associated with exposure, was not related to capillaroscopic modifications; its origin remains to be determined.

### Strengths and limitations of this study

- The strong points is that this study had a rigorous selection criteria of exclusively VCM exposed participants avoided confounding factor and the focus on retired workers at least 15 years after the end of occupational VCM exposure.
- The main limitation is that pathophysiology of Raynaud after VCM exposure remains unclear.

## INTRODUCTION

Vinyl chloride monomer (VCM) is primarily used in the manufacture of plastics and also serves as a raw material in organic synthesis. VCM is an aliphatic hydrocarbon also known as chloroethene. Its polymerization lead to a synthetic resin called polyvinyl chloride, commonly abbreviated PVC. PVC, is the third-most widely produced plastic, after polyethylene and polypropylene.<sup>1</sup> PVC can be made softer and more flexible by the addition of phthalates, and may also replace rubber. Thus, PVC is widely used including: pipes and water distribution, a substitute for painted wood (e.g. window frames, sills, flooring), electrical cable insulation, inflatable products, waterproof clothing (e.g. coats, skiing equipment, shoes), healthcare products (e.g. containers, tubing, catheters), food packaging, dental appliances and vinyl records.<sup>1</sup>

Harmless in its polymeric form, workers handling the finished PVC product are perfectly safe. In contrast, the at-risk phase lies in the manual descaling of autoclaves used for the polymerization where workers can contact it during its monomer state.<sup>2</sup> The chronic intoxication by gaseous monomer VCM is linked to several symptoms such as:<sup>3</sup> asthenia and dizziness,<sup>3</sup> Raynaud's syndrome,<sup>4 5</sup> digestive ulcers with nausea and anorexia,<sup>3</sup> systemic symptoms of arthralgia and myalgia<sup>3</sup>, trophic cutaneous symptoms and sclerosis. It has also been suspected in the onset of acroosteolysis<sup>4 6 7</sup> and hepatocellular carcinoma.<sup>8 9</sup> More generally, VCM exposure involves chromosomal aberrations and increased carcinogenic risk.<sup>10</sup> Even if VCM related diseases may have a genetic bases, they are also linked to prolonged occupational VCM exposure.<sup>5 11</sup>

Scleroderma-like microvascular abnormalities have been also described on exposed workers.<sup>12-14</sup> The most common and non-invasive means of investigating these abnormalities is capillaroscopy. Widespread identification of individuals most at risk could enable early detection and management strategy.<sup>15</sup> The residual effects of VCM on microcirculation have

1  
2  
3 been shown only once on 15 workers who had ceased their VCM exposure six months prior to  
4 testing.<sup>13</sup> However, residual long-term abnormalities following retirement are unknown. Our  
5  
6 hypothesis was higher capillaroscopic abnormalities in the VCM exposed group than in the  
7  
8 control group.  
9

10  
11 Therefore, the aim of our cross-sectional study was to investigate residual long-term  
12  
13 capillaroscopic abnormalities following retirement, after 15 years without VCM exposure.  
14  
15

## 16 17 18 19 20 21 **METHODS**

### 22 23 **Participants**

24  
25 We enrolled male retired workers exposed to VCM in PVC production. They provided written  
26  
27 informed consent. The study was approved by the human ethics committees from Clermont-  
28  
29 Ferrand university hospital, France. To be eligible, participants had to be: male (due to male  
30  
31 dominance in this workforce), retired, aged over 60 years, with at least a 5-year occupational  
32  
33 exposure to VCM, a time after VCM exposure of at least 5 years, and no exposure to  
34  
35 chemicals other than VCM. Moreover, participants with diabetes mellitus were also excluded  
36  
37 as it may interfere with microcirculation,<sup>16-21</sup> as well as individuals declaring the use or  
38  
39 previous use of treatments which may alter microcirculation.  
40  
41

42  
43 Participants responded to a survey to determine exposure time, direct or indirect contact, type  
44  
45 of occupation, time after exposure and smoking history. They underwent a medical  
46  
47 examination including a capillaroscopy, symptoms of Raynaud, and comorbidities such as  
48  
49 pathologies that may interfere with microcirculation (arterial hypertension, dyslipidemia) or  
50  
51 pathologies potentially linked with VCM exposure (cardiovascular or respiratory diseases).<sup>22</sup>  
52  
53  
54  
55  
56  
57  
58  
59  
60

1  
2  
3 A control group was matched in age, sex, type of occupation. They were recruited via  
4 advertisements. Selection criteria for this group also included no occupational or leisure  
5 chemical exposure, and no diabetes mellitus.<sup>16-21</sup>  
6  
7  
8  
9

### 10 11 12 **Capillaroscopy**

13 A nailfold capillaroscopy was performed on all fingers of each patient, excluding thumbs.<sup>23</sup>  
14 The nailfold capillaroscopies of the fingers were captured in images and electronically stored.  
15 The same investigator conducted all the capillaroscopies. A double blind analysis of  
16 capillaroscopic images was completed on deidentified data.  
17  
18  
19  
20  
21  
22

23 The outcomes were the five following classical criteria used in capillaroscopy: density,  
24 length, diameter, dystrophy and hemorrhage. Criteria for abnormalities were defined as:  
25 decreased capillary density <10/mm (avascular zone <7/mm),<sup>24</sup> augmented capillary length  
26 >300µm,<sup>24 25</sup> increased capillary diameter >25µm<sup>25</sup> (megacapillary >50µm)<sup>26 27</sup>, and  
27 dystrophy was associated with capillary branching >15%.<sup>28</sup> Hemorrhage is defined as the  
28 microvascular extravasation of the red blood cells linked to the damage of the vessel wall.<sup>27</sup>  
29  
30  
31  
32  
33  
34  
35  
36  
37  
38

### 39 **Statistics**

40 Data are presented as mean percentage change and standard deviation (SD).  
41 The main judgment criterion for abnormal microcirculation was the presence of at least one  
42 abnormality in capillaroscopy. Under the assumption of similar proportions of abnormalities  
43 as that reported during a VCM exposure,<sup>12-14</sup> our sample calculation indicated that we would  
44 need 27 participants in each of the exposed and non-exposed groups to find a change in  
45 probability of 35% (i.e., 40% in exposed versus 5% in non-exposed) for a power of 80% and a  
46 two-sided alpha of 5%. When we considered an exposed to non-exposed sample ratio of 1:2,  
47 19 and 38 participants, respectively were needed in the exposed and non-exposed groups.  
48  
49  
50  
51  
52  
53  
54  
55  
56  
57  
58  
59  
60

1  
2  
3 Under the assumption of 0% prevalence in the non-exposed group, sample sizes of 13  
4 exposed and 26 non-exposed were required.

5  
6  
7 Statistical analyses were performed with SPSS software, v19. Correlations were used for  
8 inter-observer reliability. The Gaussian distribution for each parameter was assessed by a  
9 Shapiro-Wilk test. Comparisons between groups (exposed vs. control) were made through the  
10 usual tests: Chi2 test for categorical variables (or Fisher's exact test where appropriate) and  
11 Student's t test for quantitative variables (or Kruskal-Wallis if assumptions of normal  
12 distribution were violated). Significance was accepted for a p-value < 5%. The links between  
13 continuous variables were analyzed using linear regression. The links between binary and  
14 continuous variables were analyzed with logistic regression (Nagelkerke R Square).  
15  
16 Multivariate models were used to predict the relationship between capillary parameters and  
17 other parameters such as exposure time and time after exposure.  
18  
19  
20  
21  
22  
23  
24  
25  
26  
27  
28  
29  
30  
31  
32  
33

## 34 **RESULTS**

### 37 **Participants**

38  
39 We screened 761 (97% males) retired workers exposed to chemical toxics from two leading  
40 enterprises involved in PVC production (n=435 and n=91), as well as participants from many  
41 subcontracting companies (n=235), also known for VCM exposure. The strict selection  
42 criteria of exposure only to VCM reduced the sample size to 21 (figure 1).  
43  
44  
45  
46  
47  
48

49 Thirty five age-matched controls were also recruited without occupational or leisure time  
50 exposure to chemical toxics.  
51  
52  
53  
54  
55

### 56 **Main capillaroscopic outcomes**

1  
2  
3 There was no missing data. Inter-rater reliability was confirmed with correlations exceeding  
4 0.70 for each parameter. The mean of the values of the 2 investigators is presented in table 1.  
5  
6 Concerning the qualitative data, when a disagreement occurred, the two observers analyzed  
7 again together and requested the opinion of a third expert. The disagreement occurred only for  
8  
9 2 decreased capillary density <10/mm, and 1 capillary branching >15%.

10  
11 Compared with controls, retired workers previously exposed to VCM had higher  
12 capillaroscopic abnormalities: enlarged capillaries (0% vs. 19%,  $p<.001$ ), dystrophy (0% vs.  
13 28.6%,  $p=.0012$ ) (figure 2), and augmented length (0% vs. 33%,  $p<.001$ ). The mean length  
14 was 15% higher in the exposed group than in controls ( $p=.020$ ), as well as a 12% greater  
15 diameter of capillaries ( $p=.006$ ) (table 1).  
16  
17  
18  
19  
20  
21  
22  
23  
24  
25  
26

## 27 **Exposure**

28  
29 Exposure time was  $29.8\pm 1.9$  years and time after exposure was  $15.9\pm 2.4$  years. Time of  
30 exposure to VCM was strongly linked with enlarged capillaries (Nagelkerke R Square  
31 approximation of 63%,  $p<.0001$ ), with dystrophy (Nagelkerke R Square approximation of  
32 51%,  $p<.0001$ ), and modestly linked with capillary length expressed as binary data  
33 (Nagelkerke R Square approximation of 36%,  $p<.0001$ ) or as quantitative data ( $R^2 = 8\%$ ;  
34  $p=.031$ ) (table 1). Age was not associated with capillaroscopic abnormalities. No multivariate  
35 models improved results from simple regressions.  
36  
37  
38  
39  
40  
41  
42  
43  
44  
45  
46

## 47 **Symptoms of Raynaud**

48  
49 VCM exposed group also had more symptoms of Raynaud (19% vs. 0%,  $p=.007$ ) independent  
50 of capillaroscopic modifications (table 1).  
51  
52  
53  
54  
55  
56  
57  
58  
59  
60



### Comorbidities and smoking

Neither respiratory nor cardiovascular diseases were associated with VCM exposure. However, we combined both groups to explore potential associations between capillaroscopic parameters and high blood pressure, dyslipidemia, and smoking. Capillary length in participants medicated for arterial hypertension (n=20/61) did not differ from participants without hypertension. Participants treated with lipid lowering drugs with dyslipidemia (n=10/61) also showed a trend for a higher capillary length than participants without dyslipidemia (p=.079). Finally, there were no capillaroscopic difference between smokers and non smokers. However, smokers who had been exposed to VCM tended to have a higher capillary length than non smokers (p=.073).

## DISCUSSION

### Principal findings of the study

Changes in microcirculation persist for at least 15 years following occupational VCM exposure, with a time-related exposure response. Symptoms of Raynaud, although statistically associated with exposure, was not related to pathological capillaroscopic changes.

### What the study adds

The microcirculation changes following VCM exposure has been previously shown on 15 workers who ceased their occupational exposure six months prior to testing.<sup>13</sup> Our study supports these results over a longer period following VCM exposure – 15 years.

The dose responsiveness of VCM exposure and compromised capillarisation is generally,<sup>13</sup> but not always,<sup>12</sup> reported. Although daily VCM doses may have been more informative, the

1  
2  
3 current study was restricted to years of exposure. Thus, we are limited to describing  
4  
5 associations with an exposure time – response rather than a dose-response. Years of exposure  
6  
7 is an easy question for physicians to ask of workers during risk assessment protocols.  
8

9  
10 The absence of changes in microcirculation on less exposed workers<sup>29</sup> resulted in a suggestion  
11  
12 that a threshold of exposure exists. This finding is supported by previous studies showing that  
13  
14 long-term exposure (>8 years) induced greater chromosomal aberrations.<sup>10 30</sup> Further, not all  
15  
16 workers exposed to VCM develop microvascular abnormalities, suggestive of an underlying  
17  
18 genetic susceptibility (polymorphism of glutathione S-transferase).<sup>5 11</sup> A finding that female  
19  
20 VCM-exposed workers were more susceptible than males to the risk of increased  
21  
22 chromosome damage also reinforced genetic susceptibility theory.<sup>30</sup>  
23  
24  
25  
26

### 27 **Comparison with other studies**

28  
29 After 50 years of age, minor dystrophies could alter readability and interpretation of  
30  
31 capillaroscopic analyses.<sup>31</sup> Nevertheless, we controlled this parameter by matching the  
32  
33 exposed group and the controls on age and we conducted a double-blind analysis by two  
34  
35 experienced readers. Moreover, capillaroscopic abnormalities among workers exposed to  
36  
37 VCM in the present study were not influenced by age.<sup>13</sup>  
38  
39

40  
41 VCM has been suspected of causing respiratory and circulatory diseases.<sup>32</sup> However, similar  
42  
43 frequencies of these diseases in both groups do not support this hypothesis.  
44

45  
46 Diabetes mellitus,<sup>16-21</sup> high blood pressure,<sup>18 33-35</sup> dyslipidemia,<sup>34</sup> or some  
47  
48 comorbidities/medications<sup>22</sup> could interfere with microcirculation. In line with previous  
49  
50 studies, we showed a diminished capillary length in participants treated for arterial  
51  
52 hypertension,<sup>18 33-35</sup> and a trend for participants treated with lipid lowering drugs.<sup>34</sup> Diabetes  
53  
54 mellitus was an exclusion criterion and thus, could not interfere with our results. Perhaps due  
55  
56 to low numbers of participants, our results failed to support previous findings of compromised  
57  
58  
59  
60

1  
2  
3 microcirculation in people with high blood pressure. The trend for increased capillary length  
4  
5 observed in our participants with dyslipidemia could be a response to increased peripheral  
6  
7 vascular resistance, in order to maintain their function of metabolic exchange.<sup>35</sup> Similarly,  
8  
9 smoking could induce a decrease in tissue perfusion,<sup>36</sup> and dystrophia.<sup>37</sup> We did not observe  
10  
11 differences between smokers and non-smokers, with the exception of a trend for abnormal  
12  
13 microcirculation among smokers exposed to VCM. The potential of a synergistic effect of  
14  
15 tobacco and VCM-exposure warrants further investigations. It should be noted that VCM  
16  
17 exposure in the current study was more strongly associated with compromised  
18  
19 microcirculation than high blood pressure, dyslipidemia and smoking.  
20  
21

22  
23 Previous research into the links between systemic sclerosis and VCM exposure is limited by  
24  
25 single case design<sup>38</sup> and somewhat dated analyses of a population exposed to solvents.<sup>39</sup> The  
26  
27 broader use of term such as solvents is less specific than the VCM exposure carefully isolated  
28  
29 for investigation in the present study.  
30

31  
32 A higher prevalence of symptoms of Raynaud has been established in workers with VCM  
33  
34 exposure,<sup>32</sup> up to one third of the exposed workers.<sup>13</sup> The comparison between studies with  
35  
36 different selection criteria and different sample sizes is difficult. There is also the possibility  
37  
38 of selection bias in non randomized recruitment. Within these limitations, our results support  
39  
40 previous data, and extend knowledge by demonstrating the prevalence of symptoms of  
41  
42 Raynaud remained higher at least 15 years following VCM exposure. Furthermore, in the  
43  
44 current study, all the participants who suffered from symptoms of Raynaud had never taken  
45  
46 medications or suffered from other diseases conducive to Raynaud.  
47  
48  
49  
50

### 51 **Unanswered questions**

52  
53 Although symptoms of Raynaud are statistically associated with VCM exposure, we could not  
54  
55 report a link with capillaroscopic modifications. The pathophysiology of Raynaud's  
56  
57  
58  
59  
60

1  
2  
3 phenomenon remains unknown. There seems to be primary or secondary vascular failure  
4 influenced by a hereditary factor.<sup>40</sup> Decreased perfusion pressure could be secondary to  
5 systemic hypotension or be caused by proximal arterial occlusion, influenced by many  
6 factors; both vascular and intra vascular, neural, environmental or hereditary.<sup>41</sup> Angiography  
7 of the hands of patients exposed to VCM showed occlusions, stenosis and narrowing of distal  
8 arteries with the development of collateral circulation.<sup>42</sup> Lack of statistical power in our study  
9 could contribute to the lack of relationship between capillaroscopic changes and symptoms of  
10 Raynaud.  
11  
12  
13  
14  
15  
16  
17  
18  
19

### 20 21 22 23 **Strengths and limitations of study**

24 This study presents some major strengths: a rigorous selection criteria of exclusively VCM  
25 exposed participants avoided confounding factors, well-matched controls, a double blind  
26 analyses, sufficient number of participants to detect the capillaroscopic differences between  
27 groups, the focus on retired workers at least 15 years after the end of occupational VCM  
28 exposure. The attendance rate of 30% (53 of 179 individuals exclusively exposed to VCM at  
29 work agreed to participate in our study) seems very high compared with other studies<sup>43-47</sup>  
30 taking into account their age (75 years), distance from the location of the medical examination  
31 (averaging approximately 80 km), and that no financial compensation was offered.  
32  
33  
34  
35  
36  
37  
38  
39  
40  
41

42 There are limitations to this study. The cross-sectional design has limitations; however, proof  
43 of concept was important and achieved (with a possibility of longitudinal follow-up).  
44 Differences in some but not all capillary outcomes may be explained by a lack of statistical  
45 power. The results are insufficient to propose guidelines for all workers exposed to VCM.  
46 More accurate quantifiable measures of VCM exposure are not available; however, for the  
47 purpose of this study we used industry established lists of exposure legally required in France.  
48  
49  
50  
51  
52  
53  
54  
55  
56  
57  
58  
59  
60

1  
2  
3 may lie in the fact that most of the retired workers exposed to VCM were from the same  
4  
5 enterprise; thus, potentially more at-risk manufacturing processes remained undetected.  
6  
7 Gender specificity may warrant future studies.  
8  
9

## 10 11 12 13 14 15 **CONCLUSION**

16  
17 Although VCM exposure was already known to affect microcirculation, our study  
18  
19 demonstrated the potential for residual long-term abnormalities following an average of 15  
20  
21 years retirement, with a time exposure – response. Symptoms of Raynaud, although  
22  
23 statistically associated with exposure were not associated with capillaroscopic modifications;  
24  
25 its origin remains to be determined. Future research could focus on other chemical products  
26  
27 which have a similar structure than VCM and more extensive research on type of occupations  
28  
29 at-risk of VCM exposure.  
30  
31  
32  
33  
34  
35  
36  
37

### 38 **Role of the Funding Source**

39  
40 The Occupational Medicine department of CHU G. Montpied, Clermont-Ferrand, France  
41  
42 funded this study. No other funding source had a role in the design, conduct, or reporting of  
43  
44 the study.  
45  
46  
47

### 48 **Contributors**

49  
50 VL has participated as a MD student and principal investigator. FD and AC obtained research  
51  
52 funding and generated the intellectual development of the study. FD knew potential exposed  
53  
54 workers to VCM. VL, FD, AC and SH contributed to the conception of the protocol. VL, FD  
55  
56 and SH made data analysis. VL, FD, MT contributed to manuscript drafting. VL recruited all  
57  
58  
59  
60

1  
2  
3 participants and performed all capillaroscopies. VL and MT completed the double blind  
4  
5 analyses of capillaroscopy. FD, AC, VL, GN and MT revised the manuscript. All authors read  
6  
7 and approved the final manuscript.  
8  
9

### 10 11 **Competing Interests**

12  
13  
14 None  
15  
16

### 17 18 **Data sharing**

19  
20 No additional data available.  
21  
22

### 23 24 **Acknowledgments**

25  
26 Our thanks to Dr George Mnatzaganian for help with statistics (Faculty of Health Sciences,  
27  
28 Australian Catholic University, Fitzroy, Victoria, Australia, email:  
29  
30 [George.Mnatzaganian@acu.edu.au](mailto:George.Mnatzaganian@acu.edu.au)). We also want to acknowledge the “Association of the  
31  
32 sick from chemicals” (Association des Malades de la Chimie), 15 Av Albert Poncet 03410  
33  
34 Domerat, France, which helped us recruit the retired workers from VCM exposure.  
35  
36  
37  
38  
39

### 40 41 **REFERENCES**

- 42  
43  
44  
45 1 Allsopp M, Giovanni G. Poly(Vinyl Chloride) *Ullmann's Encyclopedia of Industrial*  
46 *Chemistry* 2000.  
47 2 Fontana L, Baietto M, Becker F, et al. [Clinical and capillaroscopic study of  
48 Raynaud's phenomenon in retired patients previously exposed to vinyl chloride  
49 monomer]. *J Mal Vasc* 1995;20:268-73.  
50 3 Veltman G, Lange CE, Juhe S, Stein G, Bachner U. Clinical manifestations and course  
51 of vinyl chloride disease. *Ann N Y Acad Sci* 1975;246:6-17.  
52 4 Harris DK, Adams WG. Acro-osteolysis occurring in men engaged in the  
53 polymerization of vinyl chloride. *Br Med J* 1967;3:712-4.  
54 5 Fontana L, Marion MJ, Ughetto S, et al. Glutathione S-transferase M1 and GST T1  
55 genetic polymorphisms and Raynaud's phenomenon in French vinyl chloride  
56 monomer-exposed workers. *J Hum Genet* 2006;51:879-86.  
57  
58  
59  
60

- 1  
2  
3 6 Preston BJ, Jones KL, Grainger RG. Clinical aspects of vinyl chloride disease: acro-  
4 osteolysis. *Proc R Soc Med* 1976;69:284-6.  
5 7 Wilson RH, McCormick WE, Tatum CF, Creech JL. Occupational acroosteolysis.  
6 Report of 31 cases. *JAMA* 1967;201:577-81.  
7 8 Dragani TA, Zocchetti C. Occupational exposure to vinyl chloride and risk of  
8 hepatocellular carcinoma. *Cancer Causes Control* 2008;19:1193-200.  
9 9 Mundt KA, Dell LD, Austin RP, et al. Historical cohort study of 10 109 men in the  
10 North American vinyl chloride industry, 1942-72: update of cancer mortality to 31  
11 December 1995. *Occup Environ Med* 2000;57:774-81.  
12 13 Kumar AK, Balachandar V, Arun M et al. A Comprehensive Analysis of Plausible  
14 Genotoxic Covariates Among Workers of a Polyvinyl Chloride Plant Exposed to  
15 Vinyl Chloride Monomer. *Arch Environ Contam Toxicol* 2012.  
16 17 Ji F, Zhu S, Sun P, Wang W. [Relationship between genetic polymorphisms of phase I  
18 and phase II metabolizing enzymes and DNA damage of workers exposed to vinyl  
19 chloride monomer]. *Wei Sheng Yan Jiu* 2009;38:7-11.  
20 21 Langauer-Lewowicka H. Nailfolds capillary abnormalities in polyvinyl chloride  
22 production workers. *Int Arch Occup Environ Health* 1983;51:337-40.  
23 24 Maricq HR, Darke CS, Archibald RM, et al. In vivo observations of skin capillaries in  
25 workers exposed to vinyl chloride. An English-American comparison. *Br J Ind Med*  
26 1978;35:1-7.  
27 28 Maricq HR, Johnson MN, Whetstone CL, et al. Capillary abnormalities in polyvinyl  
29 chloride production workers. Examination by in vivo microscopy. *JAMA*  
30 1976;236:1368-71.  
31 32 Kowal-Bielecka O, Bielecki M, Kowal K. Recent advances in the diagnosis and  
33 treatment of systemic sclerosis. *Polskie Archiwum Medycyny Wewnetrznej*  
34 2013;123:51-8.  
35 36 Pazos-Moura CC, Moura EG, Bouskela E, et al. Nailfold capillaroscopy in non-insulin  
37 dependent diabetes mellitus: blood flow velocity during rest and post-occlusive  
38 reactive hyperaemia. *Clin Physiol* 1990;10:451-61.  
39 40 Iabichella ML, Mariotti R, Nuti M, et al. [Site specificity of biomicroscopic pattern in  
41 diabetic patients]. *Minerva Cardioangiol* 1999;47:619-21.  
42 43 Lambova SN, Muller-Ladner U. The specificity of capillaroscopic pattern in  
44 connective autoimmune diseases. A comparison with microvascular changes in  
45 diseases of social importance: arterial hypertension and diabetes mellitus. *Mod*  
46 *Rheumatol* 2009;19:600-5.  
47 48 Vayssairat M, Le Devehat C. [Critical analysis of vascular explorations in diabetic  
49 complications]. *J Mal Vasc* 2001;26:122-5.  
50 51 Meyer MF, Pfohl M, Schatz H. [Assessment of diabetic alterations of microcirculation  
52 by means of capillaroscopy and laser-Doppler anemometry]. *Med Klin (Munich)*  
53 2001;96:71-7.  
54 55 Chang CH, Tsai RK, Wu WC, et al. Use of dynamic capillaroscopy for studying  
56 cutaneous microcirculation in patients with diabetes mellitus. *Microvasc Res*  
57 1997;53:121-7.  
58 59 Gallucci F, Russo R, Buono R, et al. Indications and results of videocapillaroscopy in  
60 clinical practice. *Adv Med Sci* 2008;53:149-57.  
23 Hern S, Mortimer PS. Visualization of dermal blood vessels--capillaroscopy. *Clin Exp Dermatol* 1999;24:473-8.  
24 Ingegnoli F, Gualtierotti R, Lubatti C et al. Feasibility of different capillaroscopic measures for identifying nailfold microvascular alterations. *Seminars in Arthritis and Rheumatism* 2009;38:289-95.

- 1  
2  
3 25 Kabasakal Y, Elvins DM, Ring EF, et al. Quantitative nailfold capillaroscopy findings  
4 in a population with connective tissue disease and in normal healthy controls. *Ann*  
5 *Rheum Dis* 1996;55:507-12.
- 6 26 Bhakuni DS, Vasdev V, Garg MK, et al. Nailfold capillaroscopy by digital microscope  
7 in an Indian population with systemic sclerosis. *Int J Rheum Dis* 2012;15:95-101.
- 8 27 Cutolo M, Pizzorni C, Secchi ME, et al. Capillaroscopy. *Best Pract Res Clin*  
9 *Rheumatol* 2008;22:1093-108.
- 10 28 Jouanny P, Schmidt C, Feldmann L, et al. [Focus on a quick reading of nailfold  
11 capillaroscopy]. *Journal des Maladies Vasculaires* 1994;19:206-9.
- 12 29 Przybylowski J, Podolecki A, Laks L et al. [Health status of workers in polyvinyl  
13 chloride processing plants. I. Evaluation of occupational exposure. Subjective and  
14 capillaroscopy studies. Conduction velocity in the motor nerves]. *Med Pr*  
15 1983;34:385-96.
- 16 30 Jiao J, Feng NN, Li Y et al. Estimation of a Safe Level for Occupational Exposure to  
17 Vinyl Chloride Using a Benchmark Dose Method in Central China. *J Occup Health*  
18 2012.
- 19 31 Carpentier PH. New techniques for clinical assessment of the peripheral  
20 microcirculation. *Drugs* 1999;59 Spec No:17-22.
- 21 32 Laplanche A, Clavel F, Contassot JC, et al. Exposure to vinyl chloride monomer:  
22 report on a cohort study. *Br J Ind Med* 1987;44:711-5.
- 23 33 Prasad A, Dunnill GS, Mortimer PS, et al. Capillary rarefaction in the forearm skin in  
24 essential hypertension. *J Hypertens* 1995;13:265-8.
- 25 34 Bonacci E, Santacroce N, D'Amico N, et al. Nail-fold capillaroscopy in the study of  
26 microcirculation in elderly hypertensive patients. *Arch Gerontol Geriatr* 1996;22  
27 Suppl 1:79-83.
- 28 35 Antonios TF, Singer DR, Markandu ND, et al. Structural skin capillary rarefaction in  
29 essential hypertension. *Hypertension* 1999;33:998-1001.
- 30 36 Lehr HA. Microcirculatory dysfunction induced by cigarette smoking.  
31 *Microcirculation* 2000;7:367-84.
- 32 37 Lova RM, Miniati B, Macchi C et al. Morphologic changes in the microcirculation  
33 induced by chronic smoking habit: a videocapillaroscopic study on the human labial  
34 mucosa. *Am Heart J* 2002;143:658.
- 35 38 Betta A, Tommasini M, Bovenzi M, et al. [Scleroderma and occupational factors: a  
36 case-control study and analysis of literature]. *Medicina del Lavoro* 1994;85:496-506.
- 37 39 Ostlere LS, Harris D, Buckley C, et al. Atypical systemic sclerosis following exposure  
38 to vinyl chloride monomer. A case report and review of the cutaneous aspects of vinyl  
39 chloride disease. *Clinical and Experimental Dermatology* 1992;17:208-10.
- 40 40 Block JA, Sequeira W. Raynaud's phenomenon. *Lancet* 2001;357:2042-8.
- 41 41 Herrick AL. The pathogenesis, diagnosis and treatment of Raynaud phenomenon. *Nat*  
42 *Rev Rheumatol* 2012;8:469-79.
- 43 42 Koischwitz D, Marsteller HJ, Lackner K, et al. [Changes in the arteries in the hand and  
44 fingers due to vinyl chloride exposure (author's transl)]. *Rofo* 1980;132:62-8.
- 45 43 Dutheil F, Kelly C, Biat I et al. [Relation between the level of knowledge and the rate  
46 of vaccination against the flu virus among the staff of the Clermont-Ferrand  
47 University hospital]. *Med Mal Infect* 2008;38:586-94.
- 48 44 Chiew M, Weber MF, Egger S, et al. A cross-sectional exploration of smoking status  
49 and social interaction in a large population-based Australian cohort. *Social Science*  
50 *and Medicine* 2012;75:77-86.
- 51  
52  
53  
54  
55  
56  
57  
58  
59  
60



- 1  
2  
3 45 Penformis A, San-Galli F, Cimino L, et al. Current insulin therapy in patients with type  
4 2 diabetes: results of the ADHOC survey in France. *Diabetes and Metabolism*  
5 2011;37:440-5.  
6 46 Heinavaara S, Tokola K, Kurttio P, et al. Validation of exposure assessment and  
7 assessment of recruitment methods for a prospective cohort study of mobile phone  
8 users (COSMOS) in Finland: a pilot study. *Environ Health* 2011;10:14.  
9 47 Eriksen L, Gronbaek M, Helge JW, et al. The Danish Health Examination Survey  
10 2007-2008 (DANHES 2007-2008). *Scand J Public Health* 2011;39:203-11.  
11  
12  
13  
14  
15  
16  
17  
18  
19  
20  
21  
22  
23  
24  
25  
26  
27  
28  
29  
30  
31  
32  
33  
34  
35  
36  
37  
38  
39  
40  
41  
42  
43  
44  
45  
46  
47  
48  
49  
50  
51  
52  
53  
54  
55  
56  
57  
58  
59  
60

For peer review only

**Table 1** Characteristics of participants, exposure to VCM and capillaroscopic outcomes.

|                                                                 | Retired from<br>exposure to VCM<br>(n=21) | Controls<br>(n=40) | p-<br>value |
|-----------------------------------------------------------------|-------------------------------------------|--------------------|-------------|
| Age – years                                                     | 74.4±2.9                                  | 76.3±3.2           | NS          |
| type of occupation: blue collar workers – “manual”              | 100%                                      | 100%               | NS          |
| <b>Exposure to VCM:</b>                                         |                                           |                    |             |
| direct contact with VCM                                         | 100%                                      | 0                  | <.001       |
| exposure time – years                                           | 29.8±1.9                                  | 0                  | <.001       |
| time after exposure – years                                     | 15.9±2.4                                  | -                  | -           |
| <b>Main capillaroscopic outcomes:</b>                           |                                           |                    |             |
| <b>1. density</b>                                               |                                           |                    |             |
| mean density – mm                                               | 8.6±0.4                                   | 8.8±0.3            | NS          |
| decreased capillary density <10/mm – n (%)                      | 9 (43)                                    | 16 (46)            | NS          |
| avascular zone <7/mm – n(%)                                     | 0                                         | 0                  | NS          |
| <b>2. length</b>                                                |                                           |                    |             |
| mean length – µm                                                | 291±14                                    | 254±9              | .020        |
| augmented capillary length >300µm – n(%)                        | 7 (33)                                    | 0                  | <.001       |
| <b>3. diameter</b>                                              |                                           |                    |             |
| mean diameter of capillaries – µm                               | 28.9±0.9                                  | 25.7±0.6           | .006        |
| enlarged capillaries >25µm – n(%)                               | 4 (19)                                    | 0                  | .007        |
| megacapillary >50µm – n(%)                                      | 0                                         | 0                  | NS          |
| <b>4. dystrophy</b>                                             |                                           |                    |             |
| capillary branching >15% – n(%)                                 | 6 (29)                                    | 0                  | <.001       |
| <b>5. hemorrhage – n(%)</b>                                     |                                           |                    |             |
|                                                                 | 0                                         | 0                  | NS          |
| <b>Symptoms of Raynaud:</b>                                     |                                           |                    |             |
| n(%) with Raynaud                                               | 4 (19)                                    | 0                  | .007        |
| Participants with medications which could induce Raynaud – n(%) | 2 (9)                                     | 4 (11)             | NS          |
| Other causes of Raynaud                                         | 0                                         | 0                  | NS          |
| <b>Comorbidities</b>                                            |                                           |                    |             |
| Respiratory diseases                                            | 2 (9)                                     | 6 (17)             | NS          |
| Cardiovascular diseases (except high blood pressure)            | 4 (19)                                    | 5 (14)             | NS          |
| Myocardial infraction                                           | 3 (14)                                    | 3(9)               | NS          |
| <b>Routine medications – n(%) of patients treated for:</b>      |                                           |                    |             |
| Blood pressure                                                  | 7 (33)                                    | 13 (37)            | NS          |
| Lipid lowering                                                  | 4 (19)                                    | 6 (17)             | NS          |
| <b>Smoking – n(%)</b>                                           | 9 (43)                                    | 18 (51)            | NS          |

## Figure legends

**Figure 1** Participant flow chart.

**Figure 2** Normal capillaroscopy on a control participant (A) and capillaroscopy with dystrophia >15% in a retired worker exposed to VCM for 37 years, with no treatment and no comorbidity, non smoking (B).

For peer review only

1  
2  
3  
4  
5  
6  
7 **The long-term effects of occupational exposure to vinyl chloride monomer**  
8  
9 **on microcirculation: a cross-sectional study 15 years after retirement**  
10

11  
12  
13  
14  
15 Vincent Lopez <sup>1</sup>, Alain Chamoux <sup>1</sup>, Marion Tempier <sup>2</sup>, H el ene Thiel <sup>3</sup>, Sylvie Ughetto <sup>4</sup>,  
16  
17 Marion Trousselard <sup>5</sup>, Geraldine Naughton <sup>6</sup>, Fr ed eric Dutheil <sup>1,6,7,\*</sup>  
18  
19

20  
21 <sup>1</sup> Occupational Medicine, University Hospital CHU G. Montpied, 63000 Clermont-Ferrand,  
22  
23 France  
24

25 <sup>2</sup> Radiopharmacy, University Hospital CHU G. Montpied, 63000 Clermont-Ferrand, France  
26

27 <sup>3</sup> Vascular Medicine, University Hospital CHU G. Montpied, 63000 Clermont-Ferrand,  
28  
29 France  
30

31 <sup>4</sup> Department of Medical Information - Clinical research and innovation direction, University  
32  
33 Hospital CHU G. Montpied, 63000 Clermont-Ferrand, France  
34

35 <sup>5</sup> Neurophysiology of emotions, ENOP department, CRSSA/IRBA, 38702 La Tronche,  
36  
37 France  
38

39 <sup>6</sup> School of Exercise Science, Australian Catholic University, Locked Bag 4115 Fitzroy MDC  
40  
41 VIC 3065, Australia  
42

43 <sup>7</sup> Laboratory of Metabolic Adaptations to Exercise in Physiological and Pathological  
44  
45 conditions (AME2P, EA3533), 63000 Clermont-Ferrand, France  
46  
47

48 **\*Correspondance to** Fr ed eric Dutheil, Occupational Medicine, University Hospital CHU G.  
49  
50 Montpied, 63000 Clermont-Ferrand, France Tel: +33 6 88 22 48 48. Fax: +33 4 73 27 46 49.  
51  
52 fred\_dutheil@yahoo.fr.  
53  
54  
55

1  
2  
3  
4  
5  
6  
7  
8  
9  
10  
11  
12  
13  
14  
15  
16  
17  
18  
19  
20  
21  
22  
23  
24  
25  
26  
27  
28  
29  
30  
31  
32  
33  
34  
35  
36  
37  
38  
39  
40  
41  
42  
43  
44  
45  
46  
47  
48  
49  
50  
51  
52  
53  
54  
55  
56  
57  
58  
59  
60

Running Title: Capillaroscopy post-exposure to VCM

Words count for introduction methods results discussion conclusion: ~~2402~~298

Number of tables: 1

Number of figures: 2

Words count for abstract: ~~262~~58

For peer review only



## ABSTRACT

**Objectives:** To assess residual long-term microcirculation abnormalities by capillaroscopy, 15 years after retiring from occupational exposure to vinyl chloride monomer (VCM).

**Design:** Cross-sectional study.

**Setting:** Allier, one of the major area of PVC production in France.

**Participants:** We screened 761 (97% males) retired workers exposed to chemical toxics. Exposure to chemical other than VCM excluded potential participants.

**Primary and secondary outcomes measures:** These participants underwent a medical examination including a capillaroscopy, symptoms of Raynaud, and comorbidities, as well as a survey to determine exposure time, direct or indirect contact, type of occupation, smoking status and time after exposure. A double blind analysis of capillaroscopic images was done. A control group was matched in age, sex, type of occupation.

**Results:** 179/761 retired workers were only exposed to VCM at their work, with 21 meeting the inclusion criteria and included. Exposure time was  $29.8 \pm 1.9$  years and time after exposure was  $15.9 \pm 2.4$  years. Retired workers previously exposed to VCM had significantly higher capillaroscopic modifications than 35 controls: enlarged capillaries (19% vs. 0%,  $p < .001$ ), dystrophy (28.6% vs. 0%,  $p = .0012$ ), and augmented length (33% vs. 0%,  $p < .001$ ). Time exposure was linked ( $p < .0001$ ) with enlarged capillaries ( $R^2 = .R^2_{\text{adjusted}} = 63\%$ ), dystrophy ( $R^2 = .51$ ), and capillary length ( $R^2 = .36$ ),  $p < .0001$ . They also had higher symptoms of Raynaud (19% vs. 0%,  $p = .007$ ) without correlation with capillaroscopic modifications.

**Conclusion:** Although VCM exposure was already known to affect microcirculation, our study demonstrates residual long term abnormalities following an average of 15 years retirement, with a time-related exposure response. Symptoms of Raynaud, although statistically associated with exposure was not related to capillaroscopic modifications; its origin remains to be determined.

1  
2  
3  
4  
5  
6  
7  
8  
9  
10  
11  
12  
13  
14  
15  
16  
17  
18  
19  
20  
21  
22  
23  
24  
25  
26  
27  
28  
29  
30  
31  
32  
33  
34  
35  
36  
37  
38  
39  
40  
41  
42  
43  
44  
45  
46  
47  
48  
49  
50  
51  
52  
53  
54  
55  
56  
57  
58  
59  
60

**Keywords** Exposition, Vinyl chloride monomer, Capillaroscopy, Raynaud

For peer review only

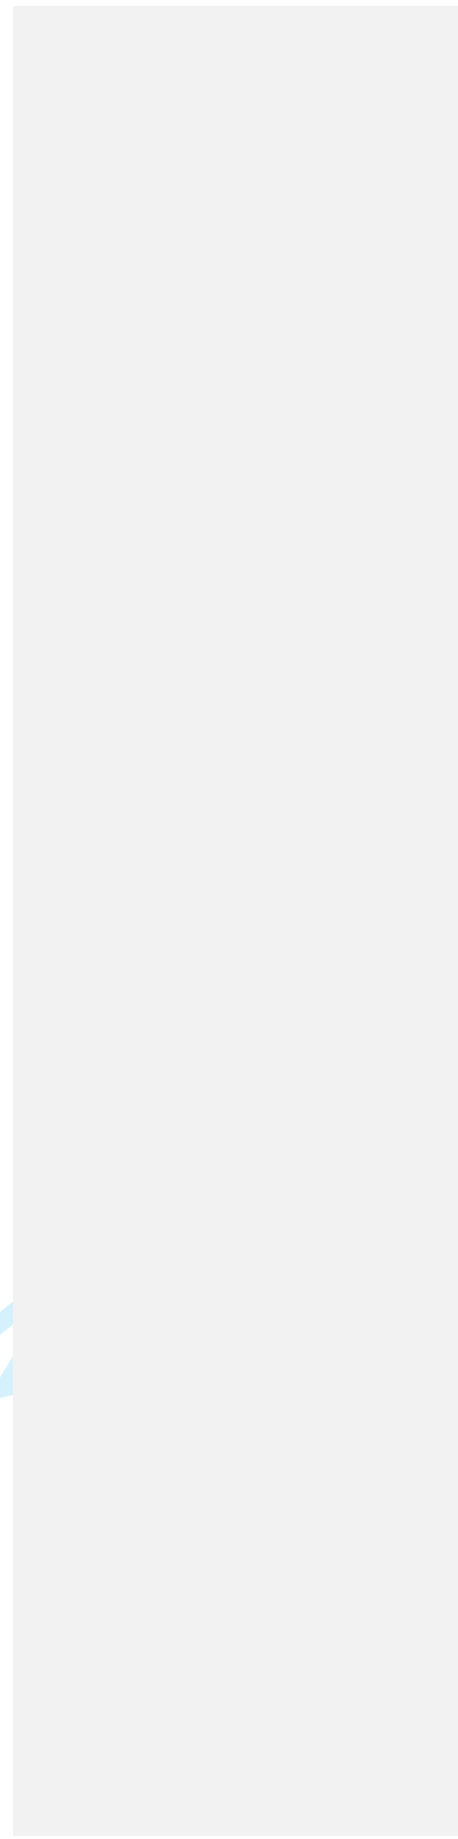

**ARTICLE SUMMARY****Article focus**

- Vinyl chloride monomer exposure induces microcirculation abnormalities, which can be diagnosed by capillaroscopy.
- Residual long-term abnormalities following retirement required investigation.

**Key messages**

- Our results demonstrated residual long-term abnormalities following an average of 15 years retirement, with a time-related exposure response.
- Symptoms of Raynaud, although statistically associated with exposure, was not related to capillaroscopic modifications; its origin remains to be determined.

**Strengths and limitations of this study**

- The strong points is that this study had a rigorous selection criteria of exclusively VCM exposed participants avoided confounding factor and the focus on retired workers at least 15 years after the end of occupational VCM exposure.
- The main limitation is that pathophysiology of Raynaud after VCM exposure remains unclear.



## INTRODUCTION

Vinyl chloride monomer (VCM) is primarily used in the manufacture of plastics and also serves as a raw material in organic synthesis. VCM is an aliphatic hydrocarbon also known as chloroethene. Its polymerization lead to a synthetic resin called polyvinyl chloride, commonly abbreviated PVC. PVC, is the third-most widely produced plastic, after polyethylene and polypropylene.<sup>1</sup> PVC can be made softer and more flexible by the addition of phthalates, and may also replace rubber. Thus, PVC is widely used including: pipes and water distribution, a substitute for painted wood (e.g. window frames, sills, flooring), electrical cable insulation, inflatable products, waterproof clothing (e.g. coats, skiing equipment, shoes), healthcare products (e.g. containers, tubing, catheters), food packaging, dental appliances and vinyl records.<sup>1</sup>

Harmless in its polymeric form, workers handling the finished PVC product are perfectly safe.

In contrast, the at-risk phase lies in the manual descaling of autoclaves used for the polymerization where workers can contact it during its monomer state.<sup>2</sup> The chronic intoxication by gaseous monomer VCM is linked to several symptoms such as:<sup>3</sup> asthenia and dizziness,<sup>3</sup> Raynaud's syndrome,<sup>4 5</sup> digestive ulcers with nausea and anorexia,<sup>3</sup> systemic symptoms of arthralgia and myalgia<sup>3</sup>, trophic cutaneous symptoms and sclerosis. It has also been suspected in the onset of acroosteolysis<sup>4 6 7</sup> and hepatocellular carcinoma.<sup>8 9</sup> More generally, VCM exposure involves chromosomal aberrations and increased carcinogenic risk.<sup>10</sup> Even if VCM related diseases may have a genetic bases, they are also linked to prolonged occupational VCM exposure.<sup>5 11</sup>

Scleroderma-like microvascular abnormalities have been also described on exposed workers.<sup>12-14</sup> The most common and non-invasive means of investigating these abnormalities is capillaroscopy. Widespread identification of individuals most at risk could enable early detection and management strategy.<sup>15</sup> The residual effects of VCM on microcirculation have

1  
2  
3  
4  
5  
6  
7 been shown only once on 15 workers who had ceased their VCM exposure six months prior to  
8 testing.<sup>13</sup> However, residual long-term abnormalities following retirement are unknown. Our  
9 hypothesis was higher capillaroscopic abnormalities in the VCM exposed group than in the  
10 control group.  
11

12  
13  
14 Therefore, the aim of our cross-sectional study was to investigate residual long-term  
15 capillaroscopic abnormalities following retirement, after 15 years without VCM exposure.  
16  
17  
18  
19

## 20 21 22 **METHODS**

### 23 24 **Participants**

25  
26 We enrolled male retired workers exposed to VCM in PVC production. They provided written  
27 informed consent. The study was approved by the human ethics committees from Clermont-  
28 Ferrand university hospital, France. To be eligible, participants had to be: male (due to male  
29 dominance in this workforce), retired, aged over 60 years, with at least a 5-year occupational  
30 exposure to VCM, a time after VCM exposure of at least 5 years, and no exposure to  
31 chemicals other than VCM. Moreover, participants with diabetes mellitus were also excluded  
32 as it may interfere with microcirculation,<sup>16-21</sup> as well as individuals declaring the use or  
33 previous use of treatments which may alter microcirculation.  
34  
35  
36  
37  
38  
39

40  
41 Participants responded to a survey to determine exposure time, direct or indirect contact, type  
42 of occupation, time after exposure and smoking history. They underwent a medical  
43 examination including a capillaroscopy, symptoms of Raynaud, and comorbidities such as  
44 pathologies that may interfere with microcirculation (arterial hypertension, dyslipidemia) or  
45 pathologies potentially linked with VCM exposure (cardiovascular or respiratory diseases).<sup>22</sup>  
46  
47  
48  
49  
50  
51  
52  
53  
54  
55

1  
2  
3  
4  
5  
6  
7  
8  
9  
10  
11  
12  
13  
14  
15  
16  
17  
18  
19  
20  
21  
22  
23  
24  
25  
26  
27  
28  
29  
30  
31  
32  
33  
34  
35  
36  
37  
38  
39  
40  
41  
42  
43  
44  
45  
46  
47  
48  
49  
50  
51  
52  
53  
54  
55  
56  
57  
58  
59  
60

A control group was matched in age, sex, type of occupation. They were recruited via advertisements. Selection criteria for this group also included no occupational or leisure chemical exposure, and no diabetes mellitus.<sup>16-21</sup>

Field Code Changed

### Capillaroscopy

A nailfold capillaroscopy was performed on all fingers of each patient, excluding thumbs.<sup>23</sup>

Field Code Changed

The nailfold capillaroscopies of the fingers were captured in images and electronically stored.

The same investigator conducted all the capillaroscopies. A double blind analysis of capillaroscopic images was completed on deidentified data.

The outcomes were the five following classical criteria used in capillaroscopy: density, length, diameter, dystrophy and hemorrhage. Criteria for abnormalities were defined as: decreased capillary density <10/mm (avascular zone <7/mm),<sup>24</sup> augmented capillary length >300µm,<sup>24 25</sup> increased capillary diameter >25µm<sup>25</sup> (megacapillary >50µm)<sup>26 27</sup>, and dystrophy was associated with capillary branching >15%.<sup>28</sup> Hemorrhage is defined as the microvascular extravasation of the red blood cells linked to the damage of the vessel wall.<sup>27</sup>

### Statistics

Data are presented as mean percentage change and standard deviation (SD).

The main judgment criterion for abnormal microcirculation was the presence of at least one abnormality in capillaroscopy. ~~The most common abnormality is capillary dystrophy.<sup>25 12-</sup>~~

Formatted: Font color: Auto

Formatted: Font color: Auto

Formatted: Font color: Auto

<sup>14</sup>Under the assumption of similar proportions of abnormalities as that reported during a VCM exposure,<sup>12-14</sup> our sample calculation indicated that we would need 27 participants in each of

Formatted: Font: (Default) Times New Roman, 12 pt

Formatted: Font: (Default) Times New Roman, 12 pt

the exposed and non-exposed groups to find a change in probability of 35% (i.e., 40% in exposed versus 5% in non-exposed) for a power of 80% and a two-sided alpha of 5%. When we considered an exposed to non-exposed sample ratio of 1:2, 19 and 38 participants,

Formatted: Font: (Default) Times New Roman, 12 pt

Formatted: Font: (Default) Times New Roman, 12 pt

1  
2  
3  
4  
5  
6  
7 respectively were needed in the exposed and non-exposed groups. Under the assumption of  
8  
9 0% prevalence in the non-exposed group, sample sizes of 13 exposed and 26 non-exposed  
10 were required.

11 ~~Previous data<sup>2-25</sup> and personal observation on residual long term abnormalities following~~  
12 ~~VCM exposure showed that a percentage of dystrophy of approximately 25% was required to~~  
13 ~~differentiate between the exposed group and the controls. Using this value as the main~~  
14 ~~outcome, we calculated that a sample of 10 participants per group allows a statistical power~~  
15 ~~greater than 80% with an alpha level less than 5%.~~

16  
17  
18  
19  
20  
21  
22 Statistical analyses were performed with SPSS software, v19. Correlations were used for  
23 inter-observer reliability. The Gaussian distribution for each parameter was assessed by a  
24 Shapiro-Wilk test. Comparisons between groups (exposed vs. control) were made through the  
25  
26 Shapiro-Wilk test. Comparisons between groups (exposed vs. control) were made through the  
27  
28 usual tests: Chi2 test for categorical variables (or Fisher's exact test where appropriate) and  
29  
30 Student's t test for quantitative variables (or Kruskal-Wallis if assumptions of normal  
31  
32 distribution were violated). Significance was accepted for a p-value < 5%. The links between  
33  
34 continuous variables were analyzed using linear regression. The links between binary and  
35  
36 continuous variables were analyzed with logistic regression (Nagelkerke R Square).  
37  
38 Multivariate models were used to predict the relationship between capillary parameters and  
39  
40 other parameters such as exposure time and time after exposure.  
41  
42  
43  
44

## 45 RESULTS

### 46 47 48 Participants

49 We screened 761 (97% males) retired workers exposed to chemical toxics from two leading  
50  
51 enterprises involved in PVC production (n=435 and n=91), as well as participants from many  
52  
53  
54  
55

Formatted: Font: (Default) Times New Roman, 12 pt, English (U.S.)

Formatted: Font color: Auto

Formatted: Font color: Auto

Formatted: Font color: Auto

Formatted: Font color: Auto

1  
2  
3  
4  
5  
6  
7 subcontracting companies (n=235), also known for VCM exposure. The strict selection  
8 criteria of exposure only to VCM reduced the sample size to 21 (figure 1).

9  
10 Thirty five age-matched controls were also recruited without occupational or leisure time  
11 exposure to chemical toxics.  
12

### 13 14 15 16 **Main capillaroscopic outcomes**

17  
18 There was no missing data. Inter-rater reliability was confirmed with correlations exceeding  
19 0.70 for each parameter. The mean of the values of the 2 investigators is presented in table 1.

20  
21 Concerning the qualitative data, when a disagreement occurred, the two observers analyzed  
22 again together and requested the opinion of a third expert. The disagreement occurred only for  
23 2 decreased capillary density <10/mm, and 1 capillary branching >15%.

24  
25 Compared with controls, retired workers previously exposed to VCM had higher  
26 capillaroscopic abnormalities: enlarged capillaries (0% vs. 19%, p<.001), dystrophy (0% vs.  
27 28.6%, p=.0012) (figure 2), and augmented length (0% vs. 33%, p<.001). The mean length  
28 was 15% higher in the exposed group than in controls (p=.020), as well as a 12% greater  
29 diameter of capillaries (p=.006) (table 1).  
30  
31  
32  
33  
34  
35  
36  
37  
38

### 39 **Exposure**

40  
41 Exposure time was 29.8±1.9 years and time after exposure was 15.9±2.4 years. Time of  
42 exposure to VCM was strongly linked with enlarged capillaries (Nagelkerke R Square  
43 approximation of  $R^2$  adjusted = 63%, p<.0001), and with dystrophy (Nagelkerke R Square  
44 approximation of 51%, p<.0001), and modestly linked with capillary length expressed as  
45 binary ( $R^2 = 8%$ ; p=.031) data (Nagelkerke R Square approximation of 36%, p<.0001) or as  
46 quantitative data ( $R^2 = 8%$ ; p=.031) (table 1). Age was not associated with capillaroscopic  
47  
48  
49  
50  
51  
52 abnormalities. No multivariate models improved results from simple regressions.  
53  
54  
55  
56  
57  
58  
59  
60

Formatted: English (U.S.)

### Symptoms of Raynaud

VCM exposed group also had more symptoms of Raynaud (19% vs. 0%,  $p=.007$ ) independent of capillaroscopic modifications (table 1).

### Comorbidities and smoking

Neither respiratory nor cardiovascular diseases were associated with VCM exposure. However, we combined both groups to explore potential associations between capillaroscopic parameters and high blood pressure, dyslipidemia, and smoking. Capillary length in participants medicated for arterial hypertension ( $n=20/61$ ) did not differ from participants without hypertension. Participants treated with lipid lowering drugs with dyslipidemia ( $n=10/61$ ) also showed a trend for a higher capillary length than participants without dyslipidemia ( $p=.079$ ). Finally, there were no capillaroscopic difference between smokers and non smokers. However, smokers who had been exposed to VCM tended to have a higher capillary length than non smokers ( $p=.073$ ).

## DISCUSSION

### Principal findings of the study

Changes in microcirculation persist for at least 15 years following occupational VCM exposure, with a time-related exposure response. Symptoms of Raynaud, although statistically associated with exposure, was not related to pathological capillaroscopic changes.

### What the study adds

The microcirculation changes following VCM exposure has been previously shown on 15 workers who ceased their occupational exposure six months prior to testing.<sup>13</sup> Our study supports these results over a longer period following VCM exposure – 15 years.

The dose responsiveness of VCM exposure and compromised capillarisation is generally,<sup>13</sup> but not always,<sup>12</sup> reported. Although daily VCM doses may have been more informative, the current study was restricted to years of exposure. Thus, we are limited to describing associations with an exposure time – response rather than a dose-response. Years of exposure is an easy question for physicians to ask of workers during risk assessment protocols.

The absence of changes in microcirculation on less exposed workers<sup>29</sup> resulted in a suggestion that a threshold of exposure exists. This finding is supported by previous studies showing that long-term exposure (>8 years) induced greater chromosomal aberrations.<sup>10 30</sup> Further, not all workers exposed to VCM develop microvascular abnormalities, suggestive of an underlying genetic susceptibility (polymorphism of glutathione S-transferase).<sup>5 11</sup> A finding that female VCM-exposed workers were more susceptible than males to the risk of increased chromosome damage also reinforced genetic susceptibility theory.<sup>30</sup>

### Comparison with other studies

After 50 years of age, minor dystrophies could alter readability and interpretation of capillaroscopic analyses.<sup>31</sup> Nevertheless, we controlled this parameter by matching the exposed group and the controls on age and we conducted a double-blind analysis by two experienced readers. Moreover, capillaroscopic abnormalities among workers exposed to VCM in the present study were not influenced by age.<sup>13</sup> VCM has been suspected of causing respiratory and circulatory diseases.<sup>32</sup> However, similar frequencies of these diseases in both groups do not support this hypothesis.

Field Code Changed

Field Code Changed

Field Code Changed

Field Code Changed

1  
2  
3  
4  
5  
6  
7 Diabetes mellitus,<sup>16-21</sup> high blood pressure,<sup>18 33-35</sup> dyslipidemia,<sup>34</sup> or some  
8 comorbidities/medications<sup>22</sup> could interfere with microcirculation. In line with previous  
9 studies, we showed a diminished capillary length in participants treated for arterial  
10 hypertension,<sup>18 33-35</sup> and a trend for participants treated with lipid lowering drugs.<sup>34</sup> Diabetes  
11 mellitus was an exclusion criterion and thus, could not interfere with our results. Perhaps due  
12 to low numbers of participants, our results failed to support previous findings of compromised  
13 microcirculation in people with high blood pressure. The trend for increased capillary length  
14 observed in our participants with dyslipidemia could be a response to increased peripheral  
15 vascular resistance, in order to maintain their function of metabolic exchange.<sup>35</sup> Similarly,  
16 smoking could induce a decrease in tissue perfusion,<sup>36</sup> and dystrophia.<sup>37</sup> We did not observe  
17 differences between smokers and non-smokers, with the exception of a trend for abnormal  
18 microcirculation among smokers exposed to VCM. The potential of a synergistic effect of  
19 tobacco and VCM-exposure warrants further investigations. It should be noted that VCM  
20 exposure in the current study was more strongly associated with compromised  
21 microcirculation than high blood pressure, dyslipidemia and smoking.

22  
23  
24  
25  
26  
27  
28  
29  
30  
31  
32  
33  
34  
35  
36  
37  
38  
39  
40  
41  
42  
43  
44  
45  
46  
47  
48  
49  
50  
51  
52  
53  
54  
55  
56  
57  
58  
59  
60

Previous research into the links between systemic sclerosis and VCM exposure is limited by  
single case design<sup>38</sup> and somewhat dated analyses of a population exposed to solvents.<sup>39</sup> The  
broader use of term such as solvents is less specific than the VCM exposure carefully isolated  
for investigation in the present study.

A higher prevalence of symptoms of Raynaud has been established in workers with VCM  
exposure,<sup>32</sup> up to one third of the exposed workers.<sup>13</sup> The comparison between studies with  
different selection criteria and different sample sizes is difficult. There is also the possibility  
of selection bias in non randomized recruitment. Within these limitations, our results support  
previous data, and extend knowledge by demonstrating the prevalence of symptoms of  
Raynaud remained higher at least 15 years following VCM exposure. Furthermore, in the

Field Code Changed



1  
2  
3  
4  
5  
6  
7  
8  
9  
10  
11  
12  
13  
14  
15  
16  
17  
18  
19  
20  
21  
22  
23  
24  
25  
26  
27  
28  
29  
30  
31  
32  
33  
34  
35  
36  
37  
38  
39  
40  
41  
42  
43  
44  
45  
46  
47  
48  
49  
50  
51  
52  
53  
54  
55  
56  
57  
58  
59  
60

current study, all the participants who suffered from symptoms of Raynaud had never taken medications or suffered from other diseases conducive to Raynaud.

### Unanswered questions

Although symptoms of Raynaud are statistically associated with VCM exposure, we could not report a link with capillaroscopic modifications. The pathophysiology of Raynaud's phenomenon remains unknown. There seems to be primary or secondary vascular failure influenced by a hereditary factor.<sup>40</sup> Decreased perfusion pressure could be secondary to systemic hypotension or be caused by proximal arterial occlusion, influenced by many factors; both vascular and intra vascular, neural, environmental or hereditary.<sup>41</sup> Angiography of the hands of patients exposed to VCM showed occlusions, stenosis and narrowing of distal arteries with the development of collateral circulation.<sup>42</sup> Lack of statistical power in our study could contribute to the lack of relationship between capillaroscopic changes and symptoms of Raynaud.

Field Code Changed

Field Code Changed

Field Code Changed

### Strengths and limitations of study

This study presents some major strengths: a rigorous selection criteria of exclusively VCM exposed participants avoided confounding factors, well-matched controls, a double blind analyses, sufficient number of participants to detect the capillaroscopic differences between groups, the focus on retired workers at least 15 years after the end of occupational VCM exposure. The attendance rate of 30% (53 of 179 individuals exclusively exposed to VCM at work agreed to participate in our study) seems very high compared with other studies<sup>43-47</sup> taking into account their age (75 years), distance from the location of the medical examination (averaging approximately 80 km), and that no financial compensation was offered.

1  
2  
3  
4  
5  
6  
7 There are limitations to this study. ~~The :-a~~ cross-sectional design has limitations; ~~h~~however,  
8 proof of concept was important and achieved (with a possibility of longitudinal follow-up). D;  
9 ~~d~~ifferences in some but not all capillary outcomes may be explained by a lack of statistical  
10 power. T; ~~t~~he results are insufficient to propose guidelines for all workers exposed to VCM.  
11 M; ~~m~~ore accurate quantifiable measures of VCM exposure are not available; ~~;~~ however, ; for the  
12 purpose of this study we used industry established lists of exposure legally required in France.  
13 The ; ~~we combined our knowledge only use a binary~~ pathophysiology of Raynaud after VCM  
14 exposure remains unclear. A further limitation may lie in the fact that m; ~~m~~ost of the retired  
15 workers exposed to VCM were from the same enterprise; thus, and ~~and~~ potentially more at-risk  
16 manufacturing processes remained undetected. Gender specificity may warrant future studies.  
17  
18  
19  
20  
21  
22  
23  
24  
25  
26  
27  
28  
29  
30

## 31 CONCLUSION

32  
33 Although VCM exposure was already known to affect microcirculation, our study  
34 demonstrated the potential for residual long-term abnormalities following an average of 15  
35 years retirement, with a time exposure – response. Symptoms of Raynaud, although  
36 statistically associated with exposure were not associated with capillaroscopic modifications;  
37 its origin remains to be determined. Future research could focus on other chemical products  
38 which have a similar structure than VCM and more extensive research on type of occupations  
39 at-risk of VCM exposure.  
40  
41  
42  
43  
44  
45  
46  
47  
48  
49

## 50 Role of the Funding Source

1  
2  
3  
4  
5  
6  
7 The Occupational Medicine department of CHU G. Montpied, Clermont-Ferrand, France  
8 funded this study. No other funding source had a role in the design, conduct, or reporting of  
9 the study.  
10  
11

### 12 13 14 **Contributors**

15  
16 VL has participated as a MD student and principal investigator. FD and AC obtained research  
17 funding and generated the intellectual development of the study. FD knew potential exposed  
18 workers to VCM. VL, FD, AC and SH contributed to the conception of the protocol. VL, FD  
19 and SH made data analysis. VL, FD, MT contributed to manuscript drafting. VL recruited all  
20 participants and performed all capillaroscopies. VL and MT completed the double blind  
21 analyses of capillaroscopy. FD, AC, VL, GN and MT revised the manuscript. All authors read  
22 and approved the final manuscript.  
23  
24  
25  
26  
27  
28  
29  
30  
31

### 32 **Acknowledgments**

33 Our thanks to Dr George Mnatzaganian Geraldine Naughton for help with statisticsmanuscript  
34 English proof reading (-Faculty of Health Sciences, Australian Catholic University, Fitzroy,  
35 Victoria, Australia, email: George.Mnatzaganian@acu.edu.au). We also want to acknowledge  
36 the “Association of the sick from chemicals” (Association des Malades de la Chimie), 15 Av  
37 Albert Poncet 03410 Domerat, France, which helped us recruit the retired workers from VCM  
38 exposure.  
39  
40  
41  
42  
43  
44  
45  
46

### 47 **REFERENCES**

- 48  
49  
50  
51 1 Allsopp M, Giovanni G. Poly(Vinyl Chloride) *Ullmann's Encyclopedia of Industrial*  
52 *Chemistry* 2000.  
53 2 Fontana L, Baietto M, Becker F, Catilina P. [Clinical and capillaroscopic study of  
54 Raynaud's phenomenon in retired patients previously exposed to vinyl chloride  
55 monomer]. *J Mal Vasc* 1995;20:268-73.  
56  
57  
58  
59  
60

Formatted: English (U.S.)

Field Code Changed

Formatted: No underline, English (U.S.)

Formatted: English (U.S.)

- 1  
2  
3  
4  
5  
6  
7  
8  
9  
10  
11  
12  
13  
14  
15  
16  
17  
18  
19  
20  
21  
22  
23  
24  
25  
26  
27  
28  
29  
30  
31  
32  
33  
34  
35  
36  
37  
38  
39  
40  
41  
42  
43  
44  
45  
46  
47  
48  
49  
50  
51  
52  
53  
54  
55  
56  
57  
58  
59  
60
- 3 Veltman G, Lange CE, Juhe S, Stein G, Bachner U. Clinical manifestations and course of vinyl chloride disease. *Ann NY Acad Sci* 1975;246:6-17.
- 4 Harris DK, Adams WG. Acro-osteolysis occurring in men engaged in the polymerization of vinyl chloride. *Br Med J* 1967;3:712-4.
- 5 Fontana L, Marion MJ, Ughetto S, Catilina P. Glutathione S-transferase M1 and GST T1 genetic polymorphisms and Raynaud's phenomenon in French vinyl chloride monomer-exposed workers. *J Hum Genet* 2006;51:879-86.
- 6 Preston BJ, Jones KL, Grainger RG. Clinical aspects of vinyl chloride disease: acro-osteolysis. *Proc R Soc Med* 1976;69:284-6.
- 7 Wilson RH, McCormick WE, Tatum CF, Creech JL. Occupational acroosteolysis. Report of 31 cases. *JAMA* 1967;201:577-81.
- 8 Dragani TA, Zocchetti C. Occupational exposure to vinyl chloride and risk of hepatocellular carcinoma. *Cancer Causes Control* 2008;19:1193-200.
- 9 Mundt KA, Dell LD, Austin RP, Luippold RS, Noess R, Bigelow C. Historical cohort study of 10 109 men in the North American vinyl chloride industry, 1942-72: update of cancer mortality to 31 December 1995. *Occup Environ Med* 2000;57:774-81.
- 10 Kumar AK, Balachandar V, Arun M et al. A Comprehensive Analysis of Plausible Genotoxic Covariates Among Workers of a Polyvinyl Chloride Plant Exposed to Vinyl Chloride Monomer. *Arch Environ Contam Toxicol* 2012.
- 11 Ji F, Zhu S, Sun P, Wang W. [Relationship between genetic polymorphisms of phase I and phase II metabolizing enzymes and DNA damage of workers exposed to vinyl chloride monomer]. *Wei Sheng Yan Jiu* 2009;38:7-11.
- 12 Langauer-Lewowicka H. Nailfolds capillary abnormalities in polyvinyl chloride production workers. *Int Arch Occup Environ Health* 1983;51:337-40.
- 13 Maricq HR, Darke CS, Archibald RM, Leroy EC. In vivo observations of skin capillaries in workers exposed to vinyl chloride. An English-American comparison. *Br J Ind Med* 1978;35:1-7.
- 14 Maricq HR, Johnson MN, Whetstone CL, LeRoy EC. Capillary abnormalities in polyvinyl chloride production workers. Examination by in vivo microscopy. *JAMA* 1976;236:1368-71.
- 15 Kowal-Bielecka O, Bielecki M, Kowal K. Recent advances in the diagnosis and treatment of systemic sclerosis. *Polskie Archiwum Medycyny Wewnetrznej* 2013;123:51-8.
- 16 Pazos-Moura CC, Moura EG, Bouskela E, Torres Filho IP, Breitenbach MM. Nailfold capillaroscopy in non-insulin dependent diabetes mellitus: blood flow velocity during rest and post-occlusive reactive hyperaemia. *Clin Physiol* 1990;10:451-61.
- 17 Iabichella ML, Mariotti R, Nuti M, Balbarini A, Mariani M. [Site specificity of biomicroscopic pattern in diabetic patients]. *Minerva Cardioangiol* 1999;47:619-21.
- 18 Lambova SN, Muller-Ladner U. The specificity of capillaroscopic pattern in connective autoimmune diseases. A comparison with microvascular changes in diseases of social importance: arterial hypertension and diabetes mellitus. *Mod Rheumatol* 2009;19:600-5.
- 19 Vayssairat M, Le Devehat C. [Critical analysis of vascular explorations in diabetic complications]. *J Mal Vasc* 2001;26:122-5.
- 20 Meyer MF, Pfohl M, Schatz H. [Assessment of diabetic alterations of microcirculation by means of capillaroscopy and laser-Doppler anemometry]. *Med Klin (Munich)* 2001;96:71-7.
- 21 Chang CH, Tsai RK, Wu WC, Kuo SL, Yu HS. Use of dynamic capillaroscopy for studying cutaneous microcirculation in patients with diabetes mellitus. *Microvasc Res* 1997;53:121-7.

Formatted: French (France)

1  
2  
3  
4  
5  
6  
7  
8  
9  
10  
11  
12  
13  
14  
15  
16  
17  
18  
19  
20  
21  
22  
23  
24  
25  
26  
27  
28  
29  
30  
31  
32  
33  
34  
35  
36  
37  
38  
39  
40  
41  
42  
43  
44  
45  
46  
47  
48  
49  
50  
51  
52  
53  
54  
55  
56  
57  
58  
59  
60

- 22 Gallucci F, Russo R, Buono R, Acampora R, Madrid E, Uomo G. Indications and results of videocapillaroscopy in clinical practice. *Adv Med Sci* 2008;53:149-57.
- 23 Hern S, Mortimer PS. Visualization of dermal blood vessels--capillaroscopy. *Clin Exp Dermatol* 1999;24:473-8.
- 24 Ingegnoli F, Gualtierotti R, Lubatti C et al. Feasibility of different capillaroscopic measures for identifying nailfold microvascular alterations. *Seminars in Arthritis and Rheumatism* 2009;38:289-95.
- 25 Kabasakal Y, Elvins DM, Ring EF, McHugh NJ. Quantitative nailfold capillaroscopy findings in a population with connective tissue disease and in normal healthy controls. *Ann Rheum Dis* 1996;55:507-12.
- 26 Bhakuni DS, Vasdev V, Garg MK, Narayanan K, Jain R, Mullick G. Nailfold capillaroscopy by digital microscope in an Indian population with systemic sclerosis. *Int J Rheum Dis* 2012;15:95-101.
- 27 Cutolo M, Pizzorni C, Secchi ME, Sulli A. Capillaroscopy. *Best Pract Res Clin Rheumatol* 2008;22:1093-108.
- 28 Jouanny P, Schmidt C, Feldmann L, Schmitt J. [Focus on a quick reading of nailfold capillaroscopy]. *Journal des Maladies Vasculaires* 1994;19:206-9.
- 29 Przybylowski J, Podolecki A, Laks L et al. [Health status of workers in polyvinyl chloride processing plants. I. Evaluation of occupational exposure. Subjective and capillaroscopy studies. Conduction velocity in the motor nerves]. *Med Pr* 1983;34:385-96.
- 30 Jiao J, Feng NN, Li Y et al. Estimation of a Safe Level for Occupational Exposure to Vinyl Chloride Using a Benchmark Dose Method in Central China. *J Occup Health* 2012.
- 31 Carpentier PH. New techniques for clinical assessment of the peripheral microcirculation. *Drugs* 1999;59 Spec No:17-22.
- 32 Laplanche A, Clavel F, Contassot JC, Lanouziere C. Exposure to vinyl chloride monomer: report on a cohort study. *Br J Ind Med* 1987;44:711-5.
- 33 Prasad A, Dunnill GS, Mortimer PS, MacGregor GA. Capillary rarefaction in the forearm skin in essential hypertension. *J Hypertens* 1995;13:265-8.
- 34 Bonacci E, Santacroce N, D'Amico N, Mattace R. Nail-fold capillaroscopy in the study of microcirculation in elderly hypertensive patients. *Arch Gerontol Geriatr* 1996;22 Suppl 1:79-83.
- 35 Antonios TF, Singer DR, Markandu ND, Mortimer PS, MacGregor GA. Structural skin capillary rarefaction in essential hypertension. *Hypertension* 1999;33:998-1001.
- 36 Lehr HA. Microcirculatory dysfunction induced by cigarette smoking. *Microcirculation* 2000;7:367-84.
- 37 Lova RM, Miniati B, Macchi C et al. Morphologic changes in the microcirculation induced by chronic smoking habit: a videocapillaroscopic study on the human labial mucosa. *Am Heart J* 2002;143:658.
- 38 Betta A, Tommasini M, Bovenzi M, Barbone F, Versini W, Romeo L. [Scleroderma and occupational factors: a case-control study and analysis of literature]. *Medicina del Lavoro* 1994;85:496-506.
- 39 Ostlere LS, Harris D, Buckley C, Black C, Rustin MH. Atypical systemic sclerosis following exposure to vinyl chloride monomer. A case report and review of the cutaneous aspects of vinyl chloride disease. *Clinical and Experimental Dermatology* 1992;17:208-10.
- 40 Block JA, Sequeira W. Raynaud's phenomenon. *Lancet* 2001;357:2042-8.
- 41 Herrick AL. The pathogenesis, diagnosis and treatment of Raynaud phenomenon. *Nat Rev Rheumatol* 2012;8:469-79.

Formatted: French (France)

Formatted: French (France)

Formatted: French (France)

Formatted: French (France)

- 1  
2  
3  
4  
5  
6  
7 42 Koischwitz D, Marsteller HJ, Lackner K, Brecht G, Brecht T. [Changes in the arteries  
8 in the hand and fingers due to vinyl chloride exposure (author's transl)]. *Rofo*  
9 1980;132:62-8.
- 10 43 Dutheil F, Kelly C, Biat I et al. [Relation between the level of knowledge and the rate  
11 of vaccination against the flu virus among the staff of the Clermont-Ferrand  
12 University hospital]. *Med Mal Infect* 2008;38:586-94.
- 13 44 Chiew M, Weber MF, Egger S, Sitas F. A cross-sectional exploration of smoking  
14 status and social interaction in a large population-based Australian cohort. *Social  
15 Science and Medicine* 2012;75:77-86.
- 16 45 Penforis A, San-Galli F, Cimino L, Huet D. Current insulin therapy in patients with  
17 type 2 diabetes: results of the ADHOC survey in France. *Diabetes and Metabolism*  
18 2011;37:440-5.
- 19 46 Heinavaara S, Tokola K, Kurttio P, Auvinen A. Validation of exposure assessment  
20 and assessment of recruitment methods for a prospective cohort study of mobile phone  
21 users (COSMOS) in Finland: a pilot study. *Environ Health* 2011;10:14.
- 22 47 Eriksen L, Gronbaek M, Helge JW, Tolstrup JS, Curtis T. The Danish Health  
23 Examination Survey 2007-2008 (DANHES 2007-2008). *Scand J Public Health*  
24 2011;39:203-11.
- 25  
26  
27  
28  
29  
30  
31  
32  
33  
34  
35  
36  
37  
38  
39  
40  
41  
42  
43  
44  
45  
46  
47  
48  
49  
50  
51  
52  
53  
54  
55  
56  
57  
58  
59  
60

**Table 1** Characteristics of participants, exposure to VCM and capillaroscopic outcomes.

|                                                                       | Retired from<br>exposure to VCM<br>(n=21) | Controls<br>(n=40) | p-<br>value |
|-----------------------------------------------------------------------|-------------------------------------------|--------------------|-------------|
| Age – years                                                           | 74.4±2.9                                  | 76.3±3.2           | NS          |
| type of <b>occupation: blue collar</b><br>workers – “manual”          | 100%                                      | 100%               | NS          |
| <b>Exposure to VCM:</b>                                               |                                           |                    |             |
| direct contact with VCM                                               | 100%                                      | 0                  | <.001       |
| exposure time – years                                                 | 29.8±1.9                                  | 0                  | <.001       |
| time after exposure – years                                           | 15.9±2.4                                  | -                  | -           |
| <b>Main capillaroscopic outcomes:</b>                                 |                                           |                    |             |
| <b>1. density</b>                                                     |                                           |                    |             |
| mean density – mm                                                     | 8.6±0.4                                   | 8.8±0.3            | NS          |
| decreased capillary density<br><10/mm – n (%)                         | 9 (43)                                    | 16 (46)            | NS          |
| avascular zone <7/mm – n(%)                                           | 0                                         | 0                  | NS          |
| <b>2. length</b>                                                      |                                           |                    |             |
| mean length – μm                                                      | 291±14                                    | 254±9              | .020        |
| augmented capillary length<br>>300μm – n(%)                           | 7 (33)                                    | 0                  | <.001       |
| <b>3. diameter</b>                                                    |                                           |                    |             |
| mean diameter of capillaries –<br>μm                                  | 28.9±0.9                                  | 25.7±0.6           | .006        |
| enlarged capillaries >25μm –<br>n(%)                                  | 4 (19)                                    | 0                  | <.007<br>‡  |
| megacapillary >50μm – n(%)                                            | 0                                         | 0                  | NS          |
| <b>4. dystrophy</b>                                                   |                                           |                    |             |
| capillary branching >15% –<br>n(%)                                    | 6 (29)                                    | 0                  | <.001       |
| <b>5. hemorrhage – n(%)</b>                                           |                                           |                    |             |
|                                                                       | 0                                         | 0                  | NS          |
| <b>Symptoms of Raynaud:</b>                                           |                                           |                    |             |
| n(%) with Raynaud                                                     | 4 (19)                                    | 0                  | .007        |
| Participants with medications<br>which could induce Raynaud –<br>n(%) | 2 (9)                                     | 4 (11)             | NS          |
| Other causes of Raynaud                                               | 0                                         | 0                  | NS          |
| <b>Comorbidities</b>                                                  |                                           |                    |             |
| Respiratory diseases                                                  | 2 (9)                                     | 6 (17)             | NS          |
| Cardiovascular diseases<br>(except high blood pressure)               | 4 (19)                                    | 5 (14)             | NS          |
| Myocardial infraction                                                 | 3 (14)                                    | 3(9)               | NS          |
| <b>Routine medications – n(%) of<br/>patients treated for:</b>        |                                           |                    |             |
| Blood pressure                                                        | 7 (33)                                    | 13 (37)            | NS          |
| Lipid lowering                                                        | 4 (19)                                    | 6 (17)             | NS          |
| <b>Smoking – n(%)</b>                                                 | 9 (43)                                    | 18 (51)            | NS          |

Figure 1 Participant flow chart.

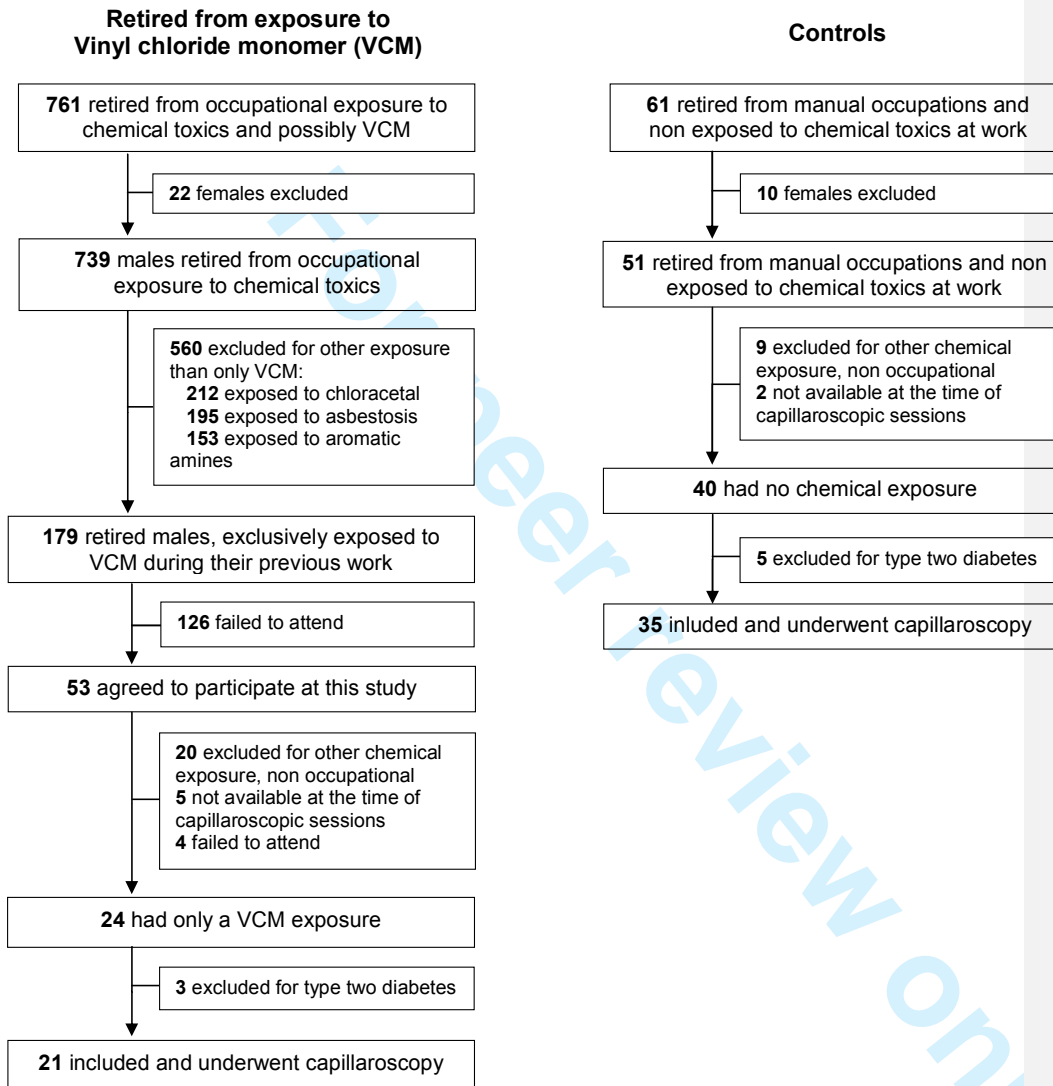



1  
2  
3  
4  
5  
6  
7  
8  
9  
10  
11  
12  
13  
14  
15  
16  
17  
18  
19  
20  
21  
22  
23  
24  
25  
26  
27  
28  
29  
30  
31  
32  
33  
34  
35  
36  
37  
38  
39  
40  
41  
42  
43  
44  
45  
46  
47  
48  
49  
50  
51  
52  
53  
54  
55  
56  
57  
58  
59  
60

**Figure 2** Normal capillaroscopy on a control participant (A) and capillaroscopy with dystrophia >15% in a retired worker exposed to VCM for 37 years, with no treatment and no comorbidity, non smoking (B).



STROBE 2007 (v4) Statement—Checklist of items that should be included in reports of *cross-sectional studies*

| Section/Topic                | Item # | Recommendation                                                                                                                                                                       | Reported on page # |
|------------------------------|--------|--------------------------------------------------------------------------------------------------------------------------------------------------------------------------------------|--------------------|
| Title and abstract           | 1      | (a) Indicate the study's design with a commonly used term in the title or the abstract                                                                                               | 1                  |
|                              |        | (b) Provide in the abstract an informative and balanced summary of what was done and what was found                                                                                  | 3                  |
| <b>Introduction</b>          |        |                                                                                                                                                                                      |                    |
| Background/rationale         | 2      | Explain the scientific background and rationale for the investigation being reported                                                                                                 | 6                  |
| Objectives                   | 3      | State specific objectives, including any prespecified hypotheses                                                                                                                     | 7                  |
| <b>Methods</b>               |        |                                                                                                                                                                                      |                    |
| Study design                 | 4      | Present key elements of study design early in the paper                                                                                                                              | 7-8                |
| Setting                      | 5      | Describe the setting, locations, and relevant dates, including periods of recruitment, exposure, follow-up, and data collection                                                      | 7                  |
| Participants                 | 6      | (a) Give the eligibility criteria, and the sources and methods of selection of participants                                                                                          | 7                  |
| Variables                    | 7      | Clearly define all outcomes, exposures, predictors, potential confounders, and effect modifiers. Give diagnostic criteria, if applicable                                             | 7-8                |
| Data sources/<br>measurement | 8*     | For each variable of interest, give sources of data and details of methods of assessment (measurement). Describe comparability of assessment methods if there is more than one group | 7-8                |
| Bias                         | 9      | Describe any efforts to address potential sources of bias                                                                                                                            | 7                  |
| Study size                   | 10     | Explain how the study size was arrived at                                                                                                                                            | 19 (figure 1)      |
| Quantitative variables       | 11     | Explain how quantitative variables were handled in the analyses. If applicable, describe which groupings were chosen and why                                                         | 8-9                |
| Statistical methods          | 12     | (a) Describe all statistical methods, including those used to control for confounding                                                                                                | 8-9                |
|                              |        | (b) Describe any methods used to examine subgroups and interactions                                                                                                                  | 8-9                |
|                              |        | (c) Explain how missing data were addressed                                                                                                                                          | 8-9                |
|                              |        | (d) If applicable, describe analytical methods taking account of sampling strategy                                                                                                   | 8-9                |
|                              |        | (e) Describe any sensitivity analyses                                                                                                                                                | 8-9                |
| <b>Results</b>               |        |                                                                                                                                                                                      |                    |

|                          |     |                                                                                                                                                                                                              |                     |
|--------------------------|-----|--------------------------------------------------------------------------------------------------------------------------------------------------------------------------------------------------------------|---------------------|
| Participants             | 13* | (a) Report numbers of individuals at each stage of study—eg numbers potentially eligible, examined for eligibility, confirmed eligible, included in the study, completing follow-up, and analysed            | 19 (figure 1)       |
|                          |     | (b) Give reasons for non-participation at each stage                                                                                                                                                         | 19 (figure 1)       |
|                          |     | (c) Consider use of a flow diagram                                                                                                                                                                           | 19 (figure 1)       |
| Descriptive data         | 14* | (a) Give characteristics of study participants (eg demographic, clinical, social) and information on exposures and potential confounders                                                                     | 7;9; 19 (figure 1)  |
|                          |     | (b) Indicate number of participants with missing data for each variable of interest                                                                                                                          | 9                   |
| Outcome data             | 15* | Report numbers of outcome events or summary measures                                                                                                                                                         | 9-10; 19 (figure 1) |
| Main results             | 16  | (a) Give unadjusted estimates and, if applicable, confounder-adjusted estimates and their precision (eg, 95% confidence interval). Make clear which confounders were adjusted for and why they were included | 9-10; 19 (figure 1) |
|                          |     | (b) Report category boundaries when continuous variables were categorized                                                                                                                                    | 9-10; 19 (figure 1) |
|                          |     | (c) If relevant, consider translating estimates of relative risk into absolute risk for a meaningful time period                                                                                             | -                   |
| Other analyses           | 17  | Report other analyses done—eg analyses of subgroups and interactions, and sensitivity analyses                                                                                                               | 9-10                |
| <b>Discussion</b>        |     |                                                                                                                                                                                                              |                     |
| Key results              | 18  | Summarise key results with reference to study objectives                                                                                                                                                     | 11-13               |
| Limitations              | 19  | Discuss limitations of the study, taking into account sources of potential bias or imprecision. Discuss both direction and magnitude of any potential bias                                                   | 13-14               |
| Interpretation           | 20  | Give a cautious overall interpretation of results considering objectives, limitations, multiplicity of analyses, results from similar studies, and other relevant evidence                                   | 11-13               |
| Generalisability         | 21  | Discuss the generalisability (external validity) of the study results                                                                                                                                        | 14                  |
| <b>Other information</b> |     |                                                                                                                                                                                                              |                     |
| Funding                  | 22  | Give the source of funding and the role of the funders for the present study and, if applicable, for the original study on which the present article is based                                                | 15                  |

\*Give information separately for cases and controls in case-control studies and, if applicable, for exposed and unexposed groups in cohort and cross-sectional studies.

**Note:** An Explanation and Elaboration article discusses each checklist item and gives methodological background and published examples of transparent reporting. The STROBE checklist is best used in conjunction with this article (freely available on the Web sites of PLoS Medicine at <http://www.plosmedicine.org/>, Annals of Internal Medicine at <http://www.annals.org/>, and Epidemiology at <http://www.epidem.com/>). Information on the STROBE Initiative is available at [www.strobe-statement.org](http://www.strobe-statement.org).

1  
2  
3  
4  
5  
6  
7  
8  
9  
10  
11  
12  
13  
14  
15  
16  
17  
18  
19  
20  
21  
22  
23  
24  
25  
26  
27  
28  
29  
30  
31  
32  
33  
34  
35  
36  
37  
38  
39  
40  
41  
42  
43  
44  
45  
46  
47  
48  
49  
50  
51  
52  
53  
54  
55  
56  
57  
58  
59  
60

Figure 1 Participant flow chart.

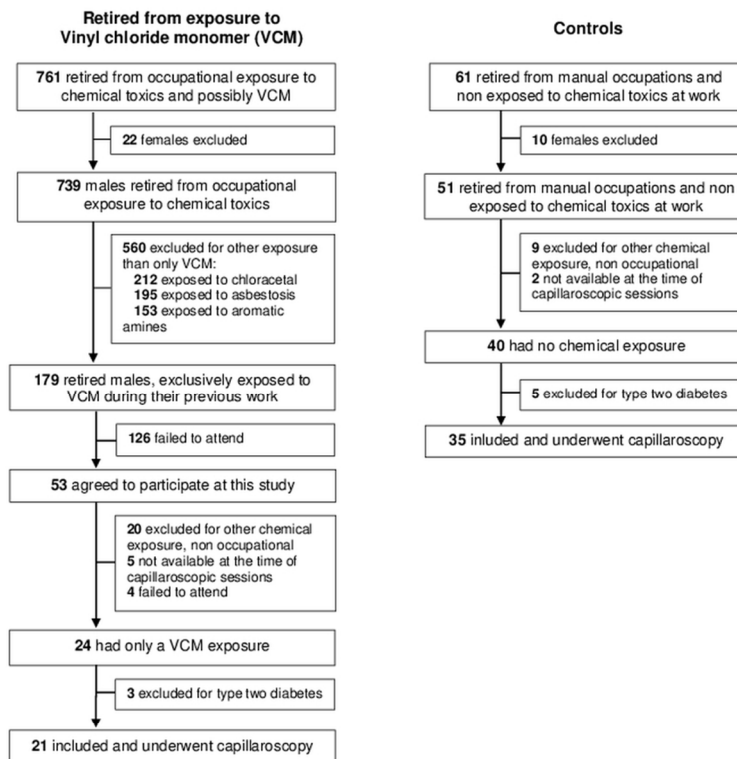

.....  
.....

90x116mm (300 x 300 DPI)

1  
2  
3  
4  
5  
6  
7  
8  
9  
10  
11  
12  
13  
14  
15  
16  
17  
18  
19  
20  
21  
22  
23  
24  
25  
26  
27  
28  
29  
30  
31  
32  
33  
34  
35  
36  
37  
38  
39  
40  
41  
42  
43  
44  
45  
46  
47  
48  
49  
50  
51  
52  
53  
54  
55  
56  
57  
58  
59  
60

**Figure 2** Normal capillaroscopy on a control participant (A) and capillaroscopy with dystrophia >15% in a retired worker exposed to VCM for 37 years, with no treatment and no comorbidity, non smoking (B).

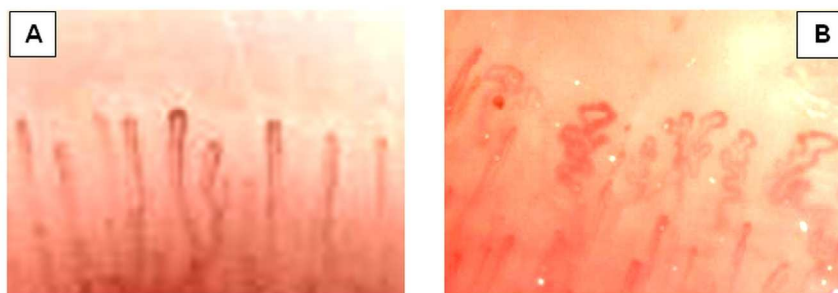

182x90mm (300 x 300 DPI)

er review only
